# Supplementary material for: Sinensetin, a polymethoxyflavone from citrus fruits, ameliorates LPS-induced acute lung injury by suppressing Txnip/NLRP3/Caspase-1/GSDMD signaling-mediated inflammatory responses and pyroptosis
Source: Royal Society of Chemistry journal article supplement (doi:10.1039/d4fo01704h), 2024-01-01
Supplement: d4fo01704h2.xlsx [file d4fo01704h2.xlsx]

## Sheet: Sheet1
Supplementary Table 1. Differential expression genes (DEGs) of LPS vs.Con (n = 3).
Gene name	LPS (Mean)	Con (Mean)	log2FoldChange	p-value	Regulation
0610040J01Rik	13.9587	10.3472	0.932471	0.00048837	Up
0610043K17Rik	1.95432	0.662518	2.04837	0.00259705	Up
1110002J07Rik	0.238807	0.0484935	2.80076	0.000790847	Up
1110002L01Rik	1.04692	2.91477	-0.997907	0.0105927	Down
1110019D14Rik	0.695627	2.52536	-1.39096	0.000164199	Down
1110025M09Rik	2.09316	1.39989	1.06432	0.000147764	Up
1110032F04Rik	0.44562	0.132271	2.25077	0.000150588	Up
1110046J04Rik	2.088	5.70044	-0.970582	0.012403	Down
1110051M20Rik	1.39609	4.13713	-1.07397	2.64505e-06	Down
1300002E11Rik	1.09074	3.16025	-1.04632	8.13747e-06	Down
1500009C09Rik	1.37697	0	9.46196	1.16124e-09	Up
1500009L16Rik	6.62915	2.85254	1.73655	0.000102357	Up
1600014C10Rik	50.0129	9.84131	2.83188	3.35867e-17	Up
1700011B04Rik	2.84556	0	9.1271	9.68636e-13	Up
1700017B05Rik	8.7042	3.78199	1.6853	1.1901e-15	Up
1700020L24Rik	0.915944	0.21659	2.5844	8.9037e-05	Up
1700025G04Rik	0.946172	2.54181	-0.933957	2.6854e-05	Down
1700025N23Rik	1.73069	0.102293	4.65257	9.81878e-05	Up
1700047M11Rik	0.699836	0.0733471	3.78487	0.0142964	Up
1700071M16Rik	0.215114	0.0327512	3.13429	0.0085057	Up
1700109H08Rik	1.91433	0.427357	2.66479	0.00143533	Up
1700113A16Rik	0.429944	2.24865	-1.90477	1.88623e-05	Down
1810010H24Rik	2.77432	14.3452	-1.88609	8.55846e-17	Down
1810034E14Rik	0.263343	1.54276	-2.06228	1.95916e-07	Down
1810055G02Rik	6.75253	5.25243	0.842718	0.000620431	Up
1810064F22Rik	0.349473	0.940709	-0.946971	0.00831454	Down
2010001A14Rik	1.53587	4.59972	-1.07855	0.00720919	Down
2010003K11Rik	0.144414	0.00718597	4.69307	0.0108786	Up
2210016L21Rik	7.13156	17.7718	-0.830853	1.70123e-06	Down
2310001H17Rik	10.9462	7.52545	1.02016	0.00194715	Up
2310002F09Rik	0.0362984	0.255697	-2.36064	0.00586593	Down
2310022A10Rik	5.99317	4.33336	0.941132	0.00133247	Up
2310022B05Rik	8.21442	24.9107	-1.11422	1.8069e-08	Down
2500004C02Rik	0.540962	2.03168	-1.40797	0.000161123	Down
2510002D24Rik	1.1072	3.84212	-1.30642	4.2668e-06	Down
2610008E11Rik	2.62109	6.97189	-0.931624	5.80291e-05	Down
2610027K06Rik	0.152657	0.926119	-2.13178	9.48442e-05	Down
2610203C22Rik	0.117192	2.44787	-3.86872	3.05697e-05	Down
2610307P16Rik	0.258648	1.12443	-1.6373	5.80667e-06	Down
2610507I01Rik	1.46951	14.4958	-2.83646	3.72659e-11	Down
2610528J11Rik	3.2301	6.99828	-0.634264	0.00354782	Down
2700046A07Rik	0.00797436	0.253527	-4.52736	0.00208785	Down
2700046G09Rik	0.150335	0.778554	-1.88235	0.000899917	Down
2700081O15Rik	1.73438	7.6848	-1.67897	3.30401e-07	Down
2810006K23Rik	0.956157	2.82572	-1.09382	0.00263754	Down
2810025M15Rik	3.58553	30.2829	-2.59847	9.23548e-34	Down
2810030D12Rik	0.41142	2.17513	-1.93746	0.00234356	Down
2810047C21Rik1	0.126608	0.0326003	2.45192	0.00592061	Up
2810410L24Rik	0.863816	4.34395	-1.87573	0.0024872	Down
2810414N06Rik	0.149225	0.872779	-2.10384	0.00434823	Down
2810433D01Rik	0.173577	2.03621	-3.03047	0.0004095	Down
2900026A02Rik	2.48131	7.81466	-1.18325	8.42521e-07	Down
2900041M22Rik	0.0252166	0.40192	-3.50715	0.00179959	Down
3110082I17Rik	7.15986	5.75255	0.810257	0.001643	Up
3300002A11Rik	9.61918	22.5748	-0.732723	0.00864509	Down
3830406C13Rik	1.72274	3.95747	-0.724514	0.00135074	Down
3930402G23Rik	0.345518	0.169363	1.49044	0.014086	Up
4632404H12Rik	0.294486	1.16862	-1.52449	0.00178449	Down
4732419C18Rik	0.146216	0	7.11724	7.55093e-05	Up
4831440E17Rik	0.0595563	0.442821	-2.41837	7.09752e-06	Down
4833407H14Rik	6.81859	1.6515	2.52709	2.04008e-10	Up
4833419F23Rik	5.55492	0.935634	3.0726	1.61391e-15	Up
4833422C13Rik	0.0515198	0.232843	-1.6711	0.00552703	Down
4833438C02Rik	3.47304	3.05734	0.671569	0.00715517	Up
4921509O07Rik	0.194639	0	7.24346	1.23151e-06	Up
4921524J17Rik	5.17799	11.1559	-0.620909	0.0019243	Down
4921529L05Rik	0.42859	0.0465041	3.70603	0.000915332	Up
4921531C22Rik	0.39107	1.23369	-1.19095	0.00681884	Down
4930404N11Rik	0.79388	3.38283	-1.58957	0.00101494	Down
4930438A08Rik	1.45894	0.0170427	6.90515	8.87861e-19	Up
4930453N24Rik	9.6523	7.76165	0.807519	0.000129876	Up
4930480K23Rik	0.0409611	0.309312	-2.40683	0.00159461	Down
4930486L24Rik	22.641	4.53205	2.78623	3.49519e-23	Up
4930509G22Rik	0.454273	0.104269	2.65799	0.000658985	Up
4930511M06Rik	0	0.0921792	-5.59127	0.000958984	Down
4930522L14Rik	0.59788	1.78799	-1.11145	0.00599455	Down
4930522O17Rik	0.0190514	1.10724	-5.34082	0.0012718	Down
4930523C07Rik	42.1625	31.1064	0.928217	0.0010324	Up
4930552P12Rik	0.119316	0.026781	2.66086	0.0105121	Up
4930555A03Rik	0.0319964	0.369961	-3.05469	0.00341118	Down
4930556M19Rik	0.831617	2.39667	-1.05784	0.00124118	Down
4930578G10Rik	1.99144	0.954867	1.54235	0.000163679	Up
4930579C12Rik	0.0415366	0.00228127	4.58392	0.00888817	Up
4930599N23Rik	7.67247	0.695048	3.92331	1.39217e-19	Up
4931406B18Rik	0.0245618	0	5.15324	0.0139854	Up
4931428F04Rik	0.223709	0.801454	-1.34612	0.000251764	Down
4932438A13Rik	7.89888	5.04111	1.13601	4.93803e-06	Up
4933403O08Rik	0.011225	0.143985	-3.25598	0.00163399	Down
4933406C10Rik	0.207425	0.838893	-1.53446	0.001447	Down
4933412E12Rik	11.7373	3.5739	2.21422	1.45142e-15	Up
4933412O06Rik	1.35394	0	8.86577	1.06089e-11	Up
4933421O10Rik	0.62846	1.63408	-0.901606	0.00164161	Down
4933431E20Rik	0.0188329	0.15019	-2.49087	0.0069042	Down
4933432I03Rik	0.717856	0.023466	5.41938	4.92592e-07	Up
4933439C10Rik	0.442442	2.00318	-1.68787	3.03898e-05	Down
5031425E22Rik	2.01345	5.37346	-0.942394	0.000138949	Down
5031434O11Rik	0.146171	0.655389	-1.67572	0.00400171	Down
5033421B08Rik	9.27524	2.68843	2.27102	6.02123e-17	Up
5033426O07Rik	0.317228	0.0704085	2.66979	0.0054629	Up
5430416N02Rik	10.5113	5.90382	1.29787	4.18701e-05	Up
5730409E04Rik	1.26745	6.1785	-1.79787	2.1229e-17	Down
5730596B20Rik	0.00227159	0.196025	-5.81844	3.8903e-05	Down
5930430L01Rik	0.0893418	0.738786	-2.55761	1.64502e-07	Down
6330403K07Rik	0.240983	1.34864	-1.9547	0.00959569	Down
6530402F18Rik	5.99342	2.26291	1.87616	5.17341e-09	Up
8430426J06Rik	0.0894255	1.89701	-3.92285	0.000406668	Down
8430432A02Rik	0.0513319	0.403967	-2.52288	0.00990721	Down
9030404E10Rik	0.212586	1.43045	-2.24343	0.012804	Down
9030622O22Rik	0.0639856	0.337918	-1.9332	1.3668e-06	Down
9130015G15Rik	0.792881	3.55224	-1.6838	1.33178e-08	Down
9330104G04Rik	0.0226789	0.215282	-2.76122	0.00399272	Down
9330133O14Rik	2.57263	1.58282	1.19227	2.84784e-06	Up
9330151L19Rik	0.921264	3.20892	-1.33934	0.00748866	Down
9330159F19Rik	0.239123	0.945422	-1.49692	0.0114588	Down
9330162012Rik	0.178496	1.06298	-2.10603	0.000187275	Down
9330175E14Rik	1.98073	0.342862	3.06705	1.03932e-05	Up
9330179D12Rik	0.665844	0.383649	1.29177	0.0150022	Up
9430015G10Rik	1.04977	2.79592	-0.937651	0.00198721	Down
9430065F17Rik	0.00591758	0.203927	-4.5179	0.0051798	Down
9530003J23Rik	0.0980476	0.61342	-2.15192	0.013193	Down
9530036O11Rik	0.287401	0.984629	-1.28491	0.00462871	Down
9530068E07Rik	102.165	89.4151	0.690449	0.00439134	Up
9530082P21Rik	5.54416	3.9402	0.973191	0.0108436	Up
9630028I04Rik	0.457011	2.99343	-2.18207	0.000330133	Down
9830107B12Rik	1.47337	0.0542206	5.23232	3.61854e-11	Up
9930012K11Rik	2.07898	6.91579	-1.2734	0.000282286	Down
9930014A18Rik	0.573416	2.47661	-1.59392	0.000690837	Down
9930111J21Rik1	9.81476	1.56346	3.13382	4.61162e-16	Up
9930111J21Rik2	1.40019	0.248193	2.99162	1.48158e-08	Up
A230045G11Rik	0.362555	1.01079	-1.00692	0.00860902	Down
A2m	0.336846	0.102728	2.22839	0.000358741	Up
A330001L22Rik	0.0311508	0.164332	-1.93099	0.00529179	Down
A330009N23Rik	0.355699	5.04174	-3.37522	3.5924e-09	Down
A330032P22Rik	0.0543082	0.919629	-3.6061	0.000455628	Down
A330076H08Rik	0.115961	0.575089	-1.82119	0.00527565	Down
A3galt2	0.739229	0.0933305	3.49704	3.31069e-05	Up
A430018G15Rik	0.217743	0.892761	-1.554	0.000123979	Down
A430027H14Rik	0.107836	0.995293	-2.70349	0.0107514	Down
A430033K04Rik	1.30301	3.02994	-0.7252	0.00634641	Down
A430035B10Rik	0.39846	1.52525	-1.4601	7.82816e-05	Down
A430046D13Rik	0.393045	2.04846	-1.9038	0.000432327	Down
A530032D15Rik	1.93524	0.11512	4.58898	1.90113e-16	Up
A530040E14Rik	1.22948	0.25748	2.77282	2.76728e-07	Up
A530064D06Rik	18.8176	1.10864	4.59592	6.43197e-18	Up
A630001G21Rik	4.58291	2.61957	1.33721	0.00831027	Up
A630001O12Rik	0.104138	0.00624293	4.55143	0.00186122	Up
A730017L22Rik	0.345164	1.53393	-1.66953	0.000103472	Down
A730049H05Rik	1.85633	0.160578	3.99444	2.15083e-16	Up
A730090N16Rik	0.176777	0.00606365	5.22521	0.0035633	Up
A830018L16Rik	0.102167	0.31221	-1.11452	0.00191873	Down
A930004D18Rik	0.146568	1.41407	-2.78383	1.52382e-16	Down
A930005H10Rik	0.802016	2.81045	-1.32085	0.000369434	Down
A930006K02Rik	0.511745	1.88877	-1.39458	0.00562579	Down
A930015D03Rik	5.69781	1.03069	2.94563	9.32891e-16	Up
AA388235	0.0632415	0.285787	-1.6914	0.0148318	Down
AA467197	415.626	5.72311	6.70041	4.64009e-49	Up
AA986860	57.5421	40.1623	0.982642	0.00331944	Up
AB124611	22.6908	8.07442	1.98992	1.63446e-07	Up
AI197445	0.0287114	0.18128	-2.17369	0.00285789	Down
AI593442	0	0.0359598	-5.54831	0.000949465	Down
AI662270	20.6948	11.2224	1.38222	8.98765e-05	Up
AI837181	37.3782	23.1127	1.17731	5.04379e-06	Up
AU021092	35.2443	75.7744	-0.628571	0.00875019	Down
AW112010	685.286	87.1585	3.48586	1.22632e-15	Up
AW549542	0.273549	2.53876	-2.71785	5.19045e-07	Down
AW554918	0.357092	0.79852	-0.667956	0.00964694	Down
Aamdc	5.67371	22.3649	-1.51112	2.25243e-07	Down
Aar2	10.7611	9.69738	0.645628	0.0116783	Up
Aard	0.935137	15.4654	-3.52601	7.99909e-06	Down
Aars	21.4069	11.7428	1.34698	2.68566e-11	Up
Aasdh	0.384988	1.01689	-0.921625	0.0111584	Down
Aass	0.881944	2.49848	-1.03815	0.00276058	Down
Aatf	6.12903	5.22485	0.730446	0.00969437	Up
Abca13	0.471686	0.0314199	4.36296	1.4309e-10	Up
Abca14	0.00430103	0.124834	-4.38452	0.00030768	Down
Abca5	3.07234	8.29361	-0.950699	0.00791464	Down
Abca6	0.0937314	0.871138	-2.69761	2.15829e-06	Down
Abca7	9.31747	6.37711	1.01266	0.00490545	Up
Abca8a	2.57509	17.2463	-2.21342	5.93552e-05	Down
Abca8b	1.13111	4.04612	-1.34154	0.000132958	Down
Abca9	0.218573	2.44507	-2.94554	1.11005e-05	Down
Abcb10	2.703	6.56559	-0.790111	0.000240581	Down
Abcb1b	5.85376	1.01316	3.05259	2.4323e-13	Up
Abcb6	2.05083	4.62294	-0.685843	0.00170569	Down
Abcb9	0.559814	1.51311	-0.950552	8.64547e-05	Down
Abcc4	3.00083	1.65297	1.35714	1.48309e-08	Up
Abcd4	1.26086	3.07195	-0.794849	0.00533135	Down
Abcg3	0.299153	2.11149	-2.35197	4.09734e-05	Down
Abhd11os	0.439433	4.16535	-2.75697	3.46532e-05	Down
Abhd14b	4.01456	18.4477	-1.7059	1.45043e-13	Down
Abhd8	3.04704	9.0233	-1.09056	6.25071e-06	Down
Abi1	50.9143	36.1452	0.970292	2.33851e-06	Up
Abi2	0.91785	2.55059	-0.989695	1.06796e-08	Down
Abl2	4.93053	3.43083	1.01643	4.54923e-05	Up
Ablim2	0.200728	0.885324	-1.63904	0.000534928	Down
Ablim3	4.79161	14.5092	-1.10943	3.78269e-05	Down
Abtb2	18.5873	2.28369	3.52732	3.85475e-22	Up
Acaa1a	51.9532	44.5408	0.698791	0.000225158	Up
Acaa2	29.1779	75.5843	-0.889285	1.16578e-07	Down
Acacb	0.408387	1.79274	-1.62211	0.000142125	Down
Acad10	0.77083	2.55863	-1.22672	0.000415945	Down
Acadl	101.04	60.061	1.24021	6.7565e-13	Up
Acadm	12.9787	32.3223	-0.826833	1.20094e-06	Down
Accs	0.364722	0.909319	-0.818958	0.00748941	Down
Ace	62.2494	228.29	-1.41116	9.69888e-06	Down
Ace3	0.016299	0.905544	-5.32973	1.21971e-14	Down
Ackr3	111.495	19.5363	2.98119	6.1548e-35	Up
Ackr4	0.0279309	3.13695	-6.34043	1.34326e-26	Down
Acod1	178.718	0.461276	9.13461	6.00124e-70	Up
Acot1	17.8551	10.9365	1.17061	0.00436418	Up
Acot13	12.5724	37.9619	-1.11705	3.95941e-06	Down
Acot6	0.0772902	0.810739	-2.90944	1.11596e-09	Down
Acot9	38.3403	26.828	0.995179	0.000169612	Up
Acoxl	2.46759	10.1073	-1.53804	0.0112716	Down
Acp5	15.8185	7.8334	1.51319	3.02591e-08	Up
Acp6	2.32025	7.33635	-1.18777	0.00012579	Down
Acpp	3.17287	1.62835	1.4403	0.000100931	Up
Acsm1	6.57185	3.75816	1.30203	0.000383392	Up
Acss1	9.0938	22.3306	-0.812166	0.00140271	Down
Actb	2128.9	1319.11	1.19087	3.69396e-07	Up
Actg1	724.063	497.487	1.01769	9.1054e-08	Up
Actn1	60.4852	35.3963	1.26993	1.13882e-05	Up
Actr2	123.528	87.6657	0.978633	2.96739e-08	Up
Actr3	235.782	126.165	1.40239	4.3625e-08	Up
Acvr1b	30.1005	16.2391	1.37223	5.08183e-17	Up
Acvr2b	0.62685	2.05143	-1.22783	1.74633e-05	Down
Acvrl1	49.9261	169.923	-1.30565	6.61225e-05	Down
Acy3	1.47747	6.02975	-1.54559	1.24344e-08	Down
Acyp1	1.17098	3.48504	-1.10313	0.000113009	Down
Ada	19.7199	1.6745	4.04273	1.27164e-54	Up
Adal	0.736812	2.00369	-0.978549	0.00721569	Down
Adam15	36.222	32.3261	0.63204	0.0114089	Up
Adam17	23.3955	16.1015	1.02672	2.72061e-07	Up
Adam22	0.256439	1.09818	-1.60875	8.66045e-06	Down
Adam23	0.262494	1.0266	-1.45557	0.000866747	Down
Adam33	0.148998	0.817145	-1.93826	0.000678037	Down
Adam8	26.3588	4.94476	2.90415	2.44978e-13	Up
Adam9	60.2543	32.5448	1.36483	2.80708e-08	Up
Adamts1	39.2889	22.6042	1.2956	4.12253e-05	Up
Adamts10	2.35333	21.6197	-2.71772	8.45472e-38	Down
Adamts13	0.00164571	0.068363	-4.7842	0.00263932	Down
Adamts14	1.35242	0.891742	1.09752	0.00165775	Up
Adamts17	0.0529702	0.274016	-1.89707	0.000114671	Down
Adamts3	1.12625	0.272612	2.55119	3.09508e-10	Up
Adamts4	37.1188	0.0747025	9.44273	3.47733e-155	Up
Adamts8	21.8711	6.65428	2.23078	1.5773e-08	Up
Adamts9	18.4895	6.79359	1.90178	0.000782973	Up
Adamtsl1	0.454806	1.00922	-0.654931	0.0107143	Down
Adamtsl5	1.6983	9.52535	-2.00273	1.09202e-11	Down
Adap1	7.68728	4.15784	1.38031	0.00743343	Up
Adap2	10.0287	5.14404	1.45859	1.03714e-09	Up
Adar	43.9536	12.9207	2.28856	9.2526e-08	Up
Adarb1	1.28317	3.49004	-0.94551	0.000154764	Down
Adat1	0.0707771	0.280365	-1.52916	0.00437212	Down
Adcy1	0.0208482	0.246278	-3.05049	1.55867e-05	Down
Adcy5	0.902537	3.23169	-1.33874	0.00208846	Down
Adcy6	1.96535	5.28531	-0.948227	0.000854569	Down
Adcy9	1.0992	4.88693	-1.67373	5.50504e-19	Down
Adcyap1r1	1.24808	0.304066	2.58498	0.000122535	Up
Adgra2	1.96899	11.621	-2.07553	7.59577e-08	Down
Adgra3	4.4372	16.9675	-1.45961	1.13678e-12	Down
Adgrb1	0.10852	0.0143481	3.39397	8.41002e-05	Up
Adgre1	16.604	8.056	1.52372	1.30307e-06	Up
Adgrg3	2.11298	1.13877	1.3579	4.55067e-06	Up
Adgrg6	6.41424	16.4722	-0.867811	0.00131391	Down
Adgrg7	0.315767	0.00791007	5.81692	1.34199e-08	Up
Adgrl1	0.873946	6.20233	-2.34467	1.6685e-18	Down
Adgrl2	21.6159	14.7565	1.03639	0.0113747	Up
Adgrl4	19.856	60.3877	-1.1548	0.00747035	Down
Adh1	2.9497	70.4375	-4.03517	2.33641e-10	Down
Adh7	0.973098	6.16673	-2.11056	0.00175337	Down
Adi1	7.47819	25.3077	-1.26681	3.27876e-08	Down
Adk	7.92536	18.371	-0.743673	0.0127478	Down
Adm	27.5354	2.62825	3.88537	2.61427e-50	Up
Adnp2	6.02011	4.79823	0.821592	5.14441e-05	Up
Adora1	1.50607	0.801244	1.38856	2.6937e-05	Up
Adora2a	15.0019	2.29931	3.22128	4.42605e-19	Up
Adora2b	17.5236	7.2309	1.75572	4.60184e-18	Up
Adora3	1.57636	0.0839655	4.73944	7.51192e-14	Up
Adpgk	11.6248	9.35186	0.791705	0.000737566	Up
Adprh	54.419	27.0784	1.48616	3.80217e-18	Up
Adra1a	0.0416308	1.1283	-4.25207	2.92881e-27	Down
Adra2b	0	0.0449846	-4.81477	0.0142039	Down
Adrb1	2.35824	21.8652	-2.74406	4.31529e-27	Down
Adrb3	0.11232	2.41529	-3.89312	3.67175e-09	Down
Adtrp	0.469444	0.14738	2.10175	0.00269188	Up
Aen	4.37226	3.90522	0.658337	0.0121763	Up
Afap1	1.43617	3.83547	-0.923704	6.54484e-05	Down
Afap1l1	21.4794	101.285	-1.77983	3.22875e-08	Down
Aff1	32.9834	17.2366	1.42813	6.3801e-06	Up
Aff2	0.0845732	0.419715	-1.80637	0.0014514	Down
Aff3	1.39672	5.15584	-1.40456	8.33038e-07	Down
Afg1l	2.32074	6.17475	-0.932087	1.46101e-05	Down
Aftph	39.1764	22.4394	1.30229	4.73034e-07	Up
Agap1	2.87121	9.16019	-1.18157	2.11517e-07	Down
Agap3	6.44267	16.6667	-0.902168	0.00144427	Down
Agbl3	0.239133	0.567618	-0.761774	0.00694506	Down
Agl	1.01281	2.29086	-0.694479	0.0101648	Down
Agmo	4.82171	11.1821	-0.732344	0.000355676	Down
Ago1	3.90169	16.6443	-1.60603	9.45881e-15	Down
Ago3	0.776872	2.0696	-0.923771	1.5365e-06	Down
Ago4	0.973867	2.82284	-1.06917	0.00947487	Down
Agpat4	28.07	22.1257	0.827268	5.84108e-05	Up
Agrn	25.6766	23.5089	0.608489	0.00307689	Up
Agtr1b	0.0157587	0.173316	-2.98611	0.00872048	Down
Agtrap	21.7956	17.0522	0.834181	0.000128592	Up
Ahcy	8.78736	7.33595	0.740076	0.00639692	Up
Ahnak2	0.367937	1.72448	-1.74909	3.09313e-07	Down
Ahr	5.55695	14.7862	-0.936103	6.04233e-05	Down
Ahsa2	2.84311	7.34965	-0.904767	0.00269364	Down
Aida	76.316	19.4266	2.47242	1.26446e-24	Up
Aif1l	0.422672	2.36776	-2.00596	5.98705e-08	Down
Airn	0.232231	1.60596	-2.31398	3.95044e-08	Down
Ajap1	0.0524522	0.262299	-1.84596	0.00959986	Down
Ajuba	2.78412	13.4248	-1.78347	1.40188e-09	Down
Ak1	2.80104	10.3754	-1.36526	0.00433744	Down
Ak2	24.0005	16.8436	1.00324	3.18427e-05	Up
Ak3	7.82212	21.0873	-0.948226	7.11833e-09	Down
Akap12	356.271	30.3815	4.05157	7.74514e-23	Up
Akap5	7.71601	46.3299	-2.09738	1.17478e-07	Down
Akap7	0.590753	1.45771	-0.826745	0.000181439	Down
Akap8l	7.44186	17.2923	-0.744753	0.00295385	Down
Akip1	6.00033	13.5519	-0.679942	0.00255606	Down
Akirin1	31.2064	28.705	0.595922	0.00231814	Up
Akna	12.9417	8.68181	1.06433	0.00157692	Up
Aknaos	0.058813	0.00518738	4.00942	0.00147897	Up
Akr1b10	4.92015	12.2788	-0.837802	0.0002602	Down
Akr1b8	19.3394	12.983	1.09181	0.00495565	Up
Akr1c14	138.743	55.0114	1.78294	0.00077461	Up
Akr1c19	0.890028	3.82364	-1.63749	0.000866519	Down
Akr1e1	2.51152	5.96377	-0.765394	0.000836224	Down
Akr7a5	4.16254	11.6356	-0.989804	0.0013641	Down
Akt2	19.3485	17.8059	0.608314	0.00382653	Up
Akt3	11.2108	9.41004	0.724243	0.0096009	Up
Aktip	3.09114	9.58574	-1.14894	2.10514e-10	Down
Alad	3.01119	10.1136	-1.26884	3.70536e-11	Down
Aldh18a1	6.32846	3.58177	1.30566	5.8283e-06	Up
Aldh1a3	1.26714	0.402355	2.16749	5.0398e-07	Up
Aldh1a7	41.9195	96.853	-0.714121	0.00053235	Down
Aldh1b1	6.83814	0.823125	3.6151	5.2256e-07	Up
Aldh1l1	9.36862	7.16973	0.86659	0.00301056	Up
Aldh2	81.9946	219.259	-0.925335	0.000405478	Down
Aldh5a1	0.422001	1.68678	-1.49604	1.54052e-05	Down
Aldh6a1	13.1375	27.7422	-0.606607	0.00917951	Down
Aldoc	1.40694	3.79279	-0.94237	0.000679894	Down
Alg14	4.96559	11.6437	-0.758012	0.00242058	Down
Alg6	0.708217	2.64034	-1.41098	3.45577e-08	Down
Alkal2	0.305039	0.0220596	4.29345	0.000173903	Up
Alox12	7.61355	3.48638	1.6797	0.0101235	Up
Alox5ap	126.07	52.4878	1.74082	3.74693e-07	Up
Alpk1	6.00551	1.39873	2.604	6.30157e-20	Up
Alpk2	0.178532	0.0254516	3.3928	0.00456544	Up
Alpl	5.58046	1.06604	2.88455	2.70326e-30	Up
Als2cl	4.0004	15.7881	-1.51744	1.8243e-05	Down
Alx4	0.144386	0.0255879	3.02458	0.00034353	Up
Amacr	1.21106	3.61211	-1.09812	0.000380602	Down
Ambp	2.26478	0.0066188	8.84554	1.27284e-10	Up
Amhr2	0.477152	1.98162	-1.58205	9.52595e-05	Down
Amigo3	1.87929	0.538781	2.32218	2.7592e-05	Up
Amn	0.361335	0.0410921	3.63462	0.00145811	Up
Amot	0.207168	1.02832	-1.82178	3.3996e-05	Down
Ampd3	27.4229	7.51629	2.33468	1.07218e-13	Up
Amph	0.384248	1.83723	-1.74761	4.33978e-05	Down
Amt	0.710945	3.09476	-1.64167	9.06799e-06	Down
Amz1	0.662442	4.85128	-2.41653	2.45595e-06	Down
Amz2	4.99267	11.7674	-0.744715	0.00048043	Down
Anapc11	4.72347	13.034	-0.976145	1.57381e-08	Down
Ang	7.04582	21.5431	-1.1353	1.58142e-07	Down
Angel1	0.19509	0.503367	-0.893626	0.00595249	Down
Angpt1	10.7167	22.4726	-0.590216	0.0142868	Down
Angpt2	26.3527	7.63163	2.25378	6.17345e-06	Up
Angptl2	3.00249	29.1896	-2.74864	8.23948e-05	Down
Angptl4	81.6287	18.5665	2.59108	1.97941e-06	Up
Ank	2.28955	6.68687	-1.0479	0.00114939	Down
Ank2	0.243804	0.0947318	1.873	3.8147e-06	Up
Ankfy1	28.4674	13.3254	1.5931	3.76875e-10	Up
Ankle2	9.79015	8.76934	0.66019	0.0122641	Up
Ankmy2	2.67442	8.72977	-1.21838	9.33003e-06	Down
Ankrd10	0.920332	2.82607	-1.14336	3.93066e-05	Down
Ankrd17	7.72266	5.23773	1.05904	0.00187591	Up
Ankrd22	8.09906	0.179901	5.97264	5.22243e-63	Up
Ankrd24	0.218473	0.619381	-1.0315	0.00201104	Down
Ankrd26	0.303767	1.39993	-1.73015	0.000674895	Down
Ankrd29	1.05835	3.13321	-1.10174	0.00377607	Down
Ankrd44	4.10201	8.67735	-0.601904	0.000676959	Down
Ankrd49	6.43611	4.3789	1.03246	7.86287e-06	Up
Ankrd50	4.08384	12.4445	-1.12692	3.92936e-07	Down
Ankrd6	0.186847	0.577285	-1.11799	0.011661	Down
Ankrd63	0.0259703	4.18164	-6.86276	2.50224e-36	Down
Ankrd65	0.295061	1.87631	-2.14796	6.14567e-05	Down
Ankrd66	4.07196	2.96514	0.952312	0.0109436	Up
Anks6	0.14203	0.514484	-1.38221	0.00429059	Down
Ano1	4.88861	15.4836	-1.18027	0.00877145	Down
Ano10	14.1832	12.4337	0.669041	0.00390635	Up
Ano5	0.00436453	0.123382	-4.32224	0.000157691	Down
Ano8	1.15013	3.55893	-1.16234	0.00239793	Down
Anp32a	36.9377	102.773	-0.982449	3.16212e-06	Down
Antxr1	10.2162	32.449	-1.17069	0.000463468	Down
Anxa1	421.478	251	1.23557	1.50173e-12	Up
Anxa13	0.770642	0.166231	2.72816	2.32543e-05	Up
Anxa2	468.736	363.446	0.844367	7.70017e-06	Up
Anxa7	112.025	55.4585	1.50684	2.38779e-11	Up
Anxa9	0.295831	0.793731	-0.951892	0.00253516	Down
Aoah	10.5025	0.611296	4.61697	1.40288e-19	Up
Aox3	11.0039	25.848	-0.755166	0.00494597	Down
Ap3b1	13.5974	9.91532	0.947636	1.35604e-05	Up
Ap3s1	23.2619	16.537	0.950837	0.00545533	Up
Ap4e1	3.50731	2.47849	0.979894	5.57059e-08	Up
Apaf1	12.8964	5.64048	1.69218	4.29324e-10	Up
Apbb1ip	18.3047	9.39154	1.45193	0.00043169	Up
Apcdd1	0.831428	4.01444	-1.76669	6.61688e-05	Down
Apela	0.37057	0.0315858	4.13421	0.00586039	Up
Apex1	18.5124	14.2001	0.863956	0.0037441	Up
Aph1b	1.17466	3.33538	-1.03464	7.29042e-05	Down
Aph1c	0.569304	1.97065	-1.3056	5.17126e-08	Down
Apln	2.31247	20.4299	-2.67162	1.09825e-20	Down
Aplnr	2.23535	19.6338	-2.63321	3.84132e-08	Down
Apoa1	0.307388	0.00821956	5.57328	0.00515463	Up
Apob	0.237789	0.0789768	2.04544	0.00651972	Up
Apobec1	13.8897	4.65436	2.09484	1.96155e-08	Up
Apobec3	33.2764	9.68039	2.29091	2.84241e-13	Up
Apobr	17.313	5.28063	2.20157	4.1589e-16	Up
Apod	163.879	7.46295	4.97951	6.29686e-06	Up
Apof	0.288591	0.0359278	3.53924	8.06311e-05	Up
Apol10b	17.9239	1.48575	4.10367	3.52465e-23	Up
Apol6	4.18316	0.376949	4.0405	4.62562e-07	Up
Apol7a	1.58493	0.33175	2.81607	0.000466938	Up
Apol7c	1.24449	0.675095	1.37417	0.000748241	Up
Apol8	0.505981	0.0189697	5.32664	0.0120841	Up
Apol9b	26.0747	4.01117	3.26555	0.00653366	Up
Apold1	21.3388	0.987576	4.93272	2.69372e-42	Up
Apon	1.68586	0.108214	4.45169	3.43498e-20	Up
Apool	13.2796	11.8932	0.645329	0.000139602	Up
Appbp2	11.2642	9.31258	0.760577	7.0446e-05	Up
Appl2	3.07601	8.19362	-0.91399	0.000723072	Down
Aqp4	2.81383	2.31917	0.778215	0.00438346	Up
Aqp5	56.9694	226.504	-1.52641	9.24927e-07	Down
Aqp9	1.11058	0.556755	1.4667	0.000260532	Up
Ar	0.190162	1.04914	-1.96718	2.9115e-08	Down
Arap1	20.0749	14.7361	0.930996	0.000347822	Up
Arc	0.856204	0.244706	2.28439	2.09234e-05	Up
Arel1	24.4517	9.14778	1.92362	1.18557e-09	Up
Arf2	41.2992	27.4115	1.06056	2.51376e-05	Up
Arf4	221.868	121.86	1.35178	4.28817e-08	Up
Arfgef1	23.3172	20.9203	0.643141	0.000538197	Up
Arg2	59.0095	9.0113	3.17752	6.94784e-23	Up
Arhgap21	1.49165	4.18834	-0.993605	9.09842e-05	Down
Arhgap23	5.47551	13.1912	-0.801141	0.00724136	Down
Arhgap25	7.34423	6.07243	0.763815	0.00513562	Up
Arhgap26	1.42678	0.640389	1.66529	1.89531e-05	Up
Arhgap30	28.6349	12.4752	1.70517	6.76641e-07	Up
Arhgap33	0.486238	1.42496	-1.06887	0.00041398	Down
Arhgap42	1.58061	3.92921	-0.832511	0.000885215	Down
Arhgap8	11.8463	3.89259	2.09286	2.21029e-10	Up
Arhgef10	0.687072	4.31654	-2.17423	2.35938e-14	Down
Arhgef10l	3.64964	2.99807	0.76258	0.00213503	Up
Arhgef12	8.60171	20.1758	-0.750065	0.0106033	Down
Arhgef15	3.61307	16.8518	-1.75266	2.55815e-10	Down
Arhgef17	4.89134	10.8816	-0.680003	0.00404297	Down
Arhgef18	4.72716	12.4452	-0.928425	0.00445596	Down
Arhgef19	0.832207	2.53653	-1.13722	0.00576441	Down
Arhgef25	1.13559	6.97748	-2.11018	1.3192e-07	Down
Arhgef37	2.16413	0.480144	2.68685	2.37425e-11	Up
Arhgef38	1.90866	6.89837	-1.39307	5.06954e-05	Down
Arhgef40	1.88887	4.10109	-0.638367	0.000966588	Down
Arhgef6	3.06141	10.2169	-1.25202	1.41401e-12	Down
Arhgef9	0.220863	0.868134	-1.47361	0.000363263	Down
Arid3a	7.24007	1.69785	2.56339	9.16305e-09	Up
Arid5a	28.1065	4.14385	3.27452	3.20154e-21	Up
Arid5b	14.6013	13.0029	0.647047	0.00966008	Up
Arih2	6.41629	4.68956	0.947775	1.70475e-05	Up
Arl10	2.00074	5.42304	-0.967711	0.000676426	Down
Arl15	0.806465	3.32547	-1.56916	9.67057e-09	Down
Arl2	12.821	28.7659	-0.687781	0.000474858	Down
Arl2bp	25.2138	60.6593	-0.769879	0.00331183	Down
Arl4a	17.1232	12.0992	0.988436	6.04366e-07	Up
Armc7	5.67735	3.25252	1.29976	4.13616e-05	Up
Armcx1	1.31873	5.92443	-1.7005	1.88595e-06	Down
Armcx4	0.71944	3.58832	-1.85223	8.63229e-06	Down
Armh4	0.368879	1.61627	-1.62258	0.000291298	Down
Arntl	0.613576	0.185875	2.22565	1.63184e-08	Up
Arpc1b	223.15	123.463	1.32314	6.54205e-08	Up
Arpc2	232.179	155.208	1.06487	1.22539e-05	Up
Arpc3	242.13	184.171	0.877615	3.39102e-09	Up
Arpc4	44.9051	34.4294	0.865858	6.57073e-05	Up
Arpc5	224.162	158.156	0.98957	1.67521e-08	Up
Arrb1	9.13789	34.5382	-1.44531	1.16427e-08	Down
Arrb2	33.9874	19.2313	1.29	0.00281068	Up
Arrdc4	28.1279	9.32139	2.09424	5.86308e-14	Up
Arsg	1.28366	0.704583	1.35176	5.97582e-06	Up
Arsi	2.07411	0.232969	3.72585	4.14647e-06	Up
Arsj	1.65112	0.499194	2.25199	0.000188502	Up
Arsk	1.31665	3.82977	-1.07213	0.000597412	Down
Art3	15.8317	10.0302	1.15941	9.32499e-06	Up
Art4	1.49728	12.386	-2.51539	5.31691e-06	Down
Arvcf	0.542563	6.05177	-3.00109	3.0482e-32	Down
Arxes2	0.835272	7.97199	-2.77208	1.12207e-06	Down
As3mt	3.14518	10.0529	-1.17968	1.797e-06	Down
Asap2	3.99191	3.3286	0.734352	0.00697962	Up
Asap3	7.9028	1.79699	2.64935	1.97735e-13	Up
Asb11	0.633492	0.144975	2.6074	0.00127766	Up
Asb13	21.2238	9.94818	1.57845	3.33352e-18	Up
Asb4	2.67376	0.0811503	5.53231	1.84339e-44	Up
Ascc3	18.6718	5.27564	2.31745	2.89919e-16	Up
Ascl1	0.0136603	0.284452	-3.87521	0.000463596	Down
Asgr1	0.0857954	0.522609	-2.1486	6.36106e-05	Down
Asns	17.8717	8.85662	1.48565	1.2866e-07	Up
Aspa	0.462187	2.94495	-2.16535	0.000138847	Down
Aspg	1.35391	0.328982	2.4977	0.000166385	Up
Aspn	2.32317	11.0145	-1.77233	2.05585e-07	Down
Asprv1	54.2846	2.13471	5.13699	4.61138e-69	Up
Ass1	43.148	16.1616	1.93548	4.39442e-07	Up
Asxl1	10.2136	9.24175	0.629515	0.00024093	Up
Atad1	38.8659	33.3207	0.708568	0.00584925	Up
Atad3aos	0.102063	0.877368	-2.63107	0.00012925	Down
Atf3	49.0446	5.00245	3.81285	4.09816e-23	Up
Atf4	243.389	126.398	1.42531	2.58173e-12	Up
Atf6	16.6014	12.7009	0.881623	0.000183094	Up
Atg14	6.87508	5.44086	0.816379	0.000186379	Up
Atg16l2	0.838049	2.24337	-0.947838	0.00136667	Down
Atg4c	0.609969	1.69745	-1.00328	0.00560659	Down
Atl1	0.369884	1.02215	-0.974798	0.00853979	Down
Atp10a	11.2872	3.31189	2.26742	5.54605e-19	Up
Atp11a	45.0847	36.7555	0.764405	0.00216177	Up
Atp11b	15.3356	13.9245	0.628254	0.00117605	Up
Atp13a1	13.5997	10.8146	0.814118	9.42445e-06	Up
Atp13a4	0.264896	1.33502	-1.83273	0.000886938	Down
Atp1a1	259.136	190.008	0.920557	8.02645e-06	Up
Atp1a2	2.61327	18.2389	-2.2658	6.22829e-05	Down
Atp1b1	260.337	222.958	0.698351	0.00245638	Up
Atp1b3	137.763	87.83	1.14364	5.66704e-06	Up
Atp23	0.154139	0.889643	-2.05491	1.2245e-07	Down
Atp2a3	18.638	88.6382	-1.74255	0.000132925	Down
Atp2b2	0.219721	1.10136	-1.812	5.41118e-05	Down
Atp2b4	6.83225	6.15991	0.649996	0.0147738	Up
Atp2c1	10.2109	21.4218	-0.591604	0.000983657	Down
Atp6v0a4	2.89128	0.933676	2.10252	5.14201e-11	Up
Atp6v0c	88.926	53.1036	1.19533	0.00188561	Up
Atp6v0e2	3.13044	11.9878	-1.43987	3.99495e-08	Down
Atp6v1b2	73.4047	64.198	0.675557	4.20453e-05	Up
Atp6v1c2	6.00777	16.8605	-1.01488	0.000218517	Down
Atp6v1d	54.2129	47.4903	0.674428	0.000106272	Up
Atp6v1e1	116.476	101.185	0.679113	0.000310668	Up
Atp6v1g1	199.449	170.607	0.699428	0.0021239	Up
Atp8b4	6.00615	1.76489	2.2575	5.76664e-12	Up
Atp9a	6.74254	16.0854	-0.774272	0.00117765	Down
Atpsckmt	0.493	1.5534	-1.18528	0.000305868	Down
Atraid	29.8116	65.5682	-0.658583	0.00200781	Down
Atrnl1	14.6741	11.8275	0.792395	0.00519745	Up
Atxn7l1	6.4684	3.40057	1.4193	4.49833e-14	Up
Atxn7l2	1.42969	1.26738	0.662969	0.0134901	Up
Avl9	9.43684	7.58309	0.800867	0.000411982	Up
Axin2	1.43738	6.74603	-1.74145	1.19907e-11	Down
Axl	54.0727	24.3682	1.6337	5.09866e-11	Up
Azgp1	1.95042	5.11976	-0.899772	0.00359114	Down
Azi2	36.736	11.2494	2.1931	9.60828e-22	Up
Azin1	21.9361	17.1701	0.832868	1.0727e-05	Up
Azin2	4.04815	10.1078	-0.855932	0.0068422	Down
B130024G19Rik	0.107932	1.74547	-3.49806	4.98568e-08	Down
B230208H11Rik	0.229296	0.892441	-1.47231	0.00557161	Down
B230217O12Rik	0.0824752	0.437915	-1.90966	0.0103428	Down
B230307C23Rik	3.32144	2.10602	1.14389	3.53287e-07	Up
B230354K17Rik	0.630402	2.24143	-1.3497	0.000250299	Down
B230398E01Rik	0.111063	0.014458	3.45789	1.15501e-06	Up
B2m	5451.44	1635.62	2.22202	3.33651e-12	Up
B330016D10Rik	0.557327	1.95278	-1.34765	0.00302842	Down
B3gnt2	41.8949	28.7735	1.02378	9.63666e-07	Up
B3gnt3	28.6871	10.71	1.88943	2.19322e-11	Up
B3gnt9	1.04918	6.18594	-2.08365	1.09935e-13	Down
B430306N03Rik	13.1869	0.854499	4.45563	5.74481e-18	Up
B4galnt1	22.0473	20.436	0.607196	0.00756828	Up
B4galt1	59.0988	39.9213	1.05749	2.04343e-08	Up
B4galt2	0.703998	2.37433	-1.27576	2.17466e-06	Down
B4galt4	11.0451	32.1333	-1.06769	6.46863e-05	Down
B4galt5	36.9594	13.9646	1.91819	2.38948e-08	Up
B4galt6	1.96109	1.0496	1.4289	0.00289179	Up
B4gat1	4.77347	16.9136	-1.33191	8.78898e-10	Down
BC005537	96.839	75.6208	0.847767	2.62978e-06	Up
BC028528	3.55942	38.8615	-2.97044	2.94939e-51	Down
BC029722	9.06387	28.7183	-1.18192	5.38016e-11	Down
BC147527	4.90165	1.80603	1.99155	0.00224902	Up
Bace1	1.50574	5.40306	-1.35672	7.88625e-10	Down
Bach1	27.9573	14.8754	1.39183	7.15942e-07	Up
Baiap2l1	6.23925	14.6295	-0.760267	0.00586884	Down
Baiap3	0.729815	2.2561	-1.14318	1.6536e-07	Down
Bak1	42.2705	20.5074	1.53955	4.25399e-09	Up
Bambi	2.53344	5.89927	-0.747132	0.0028674	Down
Basp1	26.2031	6.20197	2.61057	8.49762e-08	Up
Batf	75.2758	7.44785	3.81164	2.89966e-63	Up
Batf2	65.7092	1.82568	5.68928	6.69637e-48	Up
Batf3	3.58857	1.91888	1.40114	0.000956266	Up
Baz1a	11.3285	6.61361	1.25934	2.18014e-07	Up
Bbs10	0.399109	1.31029	-1.24293	0.00244532	Down
Bbs12	0.114729	0.38256	-1.25404	0.00215928	Down
Bbs2	2.69859	5.85723	-0.625429	0.00878636	Down
Bbx	8.24291	4.29092	1.45226	0.00050146	Up
Bcam	111.803	270.827	-0.801086	0.00392534	Down
Bcan	0.131152	0.553437	-1.6146	0.00016522	Down
Bcar3	42.069	16.832	1.77363	2.09547e-05	Up
Bcat1	0.0839885	0.0265908	2.16422	0.0052651	Up
Bche	0.585744	1.58263	-0.927991	0.0145067	Down
Bcl10	47.6624	24.986	1.42461	1.34095e-11	Up
Bcl2	1.76485	4.14898	-0.737227	0.00381095	Down
Bcl2a1a	51.3008	8.54575	3.0672	2.55962e-17	Up
Bcl2a1b	151.644	22.4365	3.25952	8.43902e-20	Up
Bcl2a1d	79.3633	13.1787	3.07853	2.03811e-19	Up
Bcl2l1	61.0777	37.9974	1.14435	0.00139453	Up
Bcl2l11	8.1085	3.47684	1.71765	9.92779e-07	Up
Bcl2l12	4.05261	10.0174	-0.829159	0.0059012	Down
Bcl2l15	0.0883065	0.0094704	3.74516	0.000436842	Up
Bcl2l2	6.327	14.5254	-0.731951	0.0056763	Down
Bcl3	91.5627	10.2772	3.64492	2.10411e-97	Up
Bcl6	13.6479	9.34673	1.03279	7.47599e-05	Up
Bcl6b	22.8639	11.5864	1.46982	4.46594e-06	Up
Bcl7a	1.6889	6.40924	-1.44046	4.90904e-11	Down
Bcl9	2.81448	2.04253	0.967666	0.00304702	Up
Bcl9l	4.39089	11.3133	-0.898936	0.00646235	Down
Bclaf1	20.9834	17.7462	0.724619	0.000139453	Up
Bdkrb1	6.69667	2.28236	2.05631	1.32486e-05	Up
Bdkrb2	6.42892	1.95358	2.19315	5.93275e-22	Up
Bdnf	1.33618	3.31067	-0.844529	0.0101965	Down
Bean1	2.52036	0.103534	5.07705	2.47405e-37	Up
Begain	0.174907	1.13502	-2.20326	0.000356177	Down
Best1	1.60514	1.1233	0.988224	0.00388279	Up
Best3	0.0223356	0.383115	-3.58305	7.19532e-09	Down
Bex2	3.5414	36.4649	-2.88879	5.52998e-27	Down
Bex4	21.6	57.5544	-0.938127	0.00014535	Down
Bfar	9.31004	8.6455	0.600721	0.0022752	Up
Bhlhe40	43.8623	28.0949	1.13664	0.000820411	Up
Bhlhe41	1.20186	5.74217	-1.78238	4.99739e-10	Down
Bicd2	8.77752	20.9271	-0.788371	0.00859396	Down
Bicra	2.70392	2.45546	0.619892	0.00436796	Up
Bid	12.5091	4.17129	2.06876	6.97836e-14	Up
Bin3	15.0646	8.79406	1.25927	1.19021e-06	Up
Birc2	28.1462	11.093	1.84277	1.24504e-09	Up
Birc3	75.1395	11.5854	3.2003	1.58654e-24	Up
Bivm	1.22939	3.76728	-1.14632	0.000108225	Down
Blk	0.984848	3.38991	-1.26735	0.00184109	Down
Blm	0.748663	0.481135	1.14734	0.00337605	Up
Bloc1s5	1.55052	4.06141	-0.909529	1.45614e-05	Down
Bloc1s6	9.0748	7.72242	0.731935	0.00391897	Up
Bmf	13.0348	10.3352	0.809291	0.000887371	Up
Bmncr	0.0925119	0.349738	-1.43833	0.0105916	Down
Bmp2k	3.7491	3.10783	0.767212	0.00114316	Up
Bmp3	1.3571	10.9794	-2.53094	5.92605e-20	Down
Bmp6	10.6313	63.3845	-2.09276	2.03094e-24	Down
Bmper	11.3664	5.62938	1.51262	3.02502e-07	Up
Bmpr1b	0.280126	1.07822	-1.45223	4.56939e-05	Down
Bmx	1.58024	5.19116	-1.24073	0.000316586	Down
Bmyc	2.77008	17.2481	-2.16635	5.45753e-15	Down
Bnc1	0.0287105	0.223684	-2.4671	0.0148087	Down
Bnc2	0.0663488	0.377885	-1.97244	0.0012825	Down
Bnip5	0.122019	0.0172804	3.32586	0.000117393	Up
Bnipl	1.56602	3.79019	-0.792135	0.00853531	Down
Boc	2.87106	6.96776	-0.778592	0.00516512	Down
Brd2	69.8808	49.5755	0.986512	5.50273e-07	Up
Brd4	5.06951	4.35753	0.716056	0.0017594	Up
Brf1	2.52826	5.55547	-0.649194	0.00010448	Down
Brip1	0.825469	0.262361	2.16453	1.52433e-06	Up
Brms1	24.5004	19.9535	0.779477	8.41501e-06	Up
Brpf1	10.2292	9.32306	0.622125	0.000183332	Up
Brsk1	0.390196	1.12178	-1.04003	0.00112557	Down
Bst1	57.4924	10.8418	2.85353	4.14978e-10	Up
Bst2	580.62	151.328	2.42817	6.20302e-10	Up
Btbd16	1.14438	0.00442418	8.515	6.22459e-15	Up
Btbd17	0.0879388	0.00552071	4.48196	0.000472389	Up
Btbd3	2.61806	15.2742	-2.07069	7.99352e-19	Down
Btbd6	1.11595	3.55387	-1.1928	5.71228e-06	Down
Btbd8	0.308116	0.797695	-0.874918	0.00609976	Down
Btbd9	1.42575	0.966156	1.04987	4.11559e-06	Up
Btg1	91.3524	39.896	1.70136	2.14818e-09	Up
Btg2	88.5455	52.1895	1.2357	5.47193e-05	Up
Btk	7.11155	4.51628	1.14074	0.000369514	Up
Btn1a1	0.0439814	0	5.54388	0.00301256	Up
Btnl6	0.0786323	0	5.66023	0.00378958	Up
Bub1b	4.14603	2.73949	1.09739	0.00483607	Up
Bud31	57.8228	51.3699	0.653985	8.67059e-05	Up
Bvht	9.72637	22.6873	-0.73921	0.000772758	Down
C030034L19Rik	0.0101566	0.144082	-3.34795	0.000317129	Down
C130026I21Rik	0.398666	0.130287	2.12738	4.31615e-05	Up
C130046K22Rik	0.3776	1.07171	-1.04088	0.0115585	Down
C130050O18Rik	1.54695	0.538629	1.99441	3.60579e-08	Up
C1ql2	0.101404	0.00419511	4.98956	0.00672555	Up
C1qtnf12	2.36847	9.65825	-1.5465	2.76205e-10	Down
C1qtnf2	1.97855	11.6413	-2.06036	2.9043e-10	Down
C1qtnf4	0.0962621	0.3036	-1.17795	0.00503992	Down
C1qtnf6	1.98377	5.15937	-0.885618	0.0088606	Down
C1qtnf7	0.693057	9.82559	-3.31764	7.43715e-22	Down
C1ra	86.3455	31.4318	1.96223	4.3746e-09	Up
C1rb	0.308855	0.107927	2.03903	0.00952275	Up
C1rl	5.63739	2.75523	1.51716	1.09212e-07	Up
C2	23.24	8.40521	1.96768	2.95272e-08	Up
C230037L18Rik	1.51095	0.505588	2.06833	0.000362051	Up
C230062I16Rik	0.0441687	0.745688	-3.60515	6.94742e-09	Down
C2cd2	1.8719	5.15611	-0.984598	6.70372e-08	Down
C3	283.293	97.1354	2.04562	5.9089e-13	Up
C3ar1	5.21619	2.22789	1.77908	0.0100931	Up
C430049B03Rik	0.632794	2.28102	-1.37994	0.00163185	Down
C5ar1	49.4883	6.523	3.38401	6.87979e-22	Up
C630043F03Rik	1.01629	3.11887	-1.15924	0.00173694	Down
C920009B18Rik	0.64162	0.243396	1.89398	5.53995e-06	Up
Cabp4	1.05294	0.0492973	4.97087	1.54407e-06	Up
Cabyr	0.236582	0.0472691	2.84899	0.00246953	Up
Cacna1i	0.0275725	0.339903	-3.09171	4.43286e-06	Down
Cacul1	9.06428	6.63423	0.933556	8.7416e-07	Up
Cadm1	4.08868	12.2283	-1.09207	0.00222874	Down
Calca	2.67487	0.427589	3.11698	1.77172e-15	Up
Calcoco1	14.9273	32.55	-0.642504	0.00276766	Down
Calcrl	13.0391	176.254	-3.31612	2.17554e-11	Down
Calhm2	3.09949	7.28302	-0.754415	0.00542808	Down
Calhm6	57.7505	2.3429	5.20041	2.5123e-06	Up
Calml4	4.70366	11.3956	-0.787014	0.0093577	Down
Calr	247.838	220.906	0.658409	0.0055831	Up
Camk1	14.2193	44.6805	-1.16649	8.31928e-10	Down
Camk2a	0.0707325	0.441977	-2.12617	0.00640556	Down
Camk2d	7.73886	5.89663	0.881149	6.39953e-06	Up
Camk2g	3.3206	8.02936	-0.795771	0.00395861	Down
Camkk2	4.31725	3.59193	0.740019	0.004122	Up
Camkmt	0.177307	0.526954	-1.09438	1.0575e-05	Down
Camp	125.892	3.03401	5.86429	2.8577e-19	Up
Cand2	0.207511	0.57103	-0.96855	0.00424706	Down
Cap1	179.477	114.425	1.12682	1.51368e-07	Up
Capg	53.5568	28.2018	1.3888	4.38952e-06	Up
Capn11	0.138478	0	6.97485	0.00317261	Up
Capza1	48.6319	27.5151	1.29775	9.06669e-09	Up
Capza2	176.218	77.1881	1.6768	7.27286e-20	Up
Car1	0.228614	0.0172259	4.27285	0.00415002	Up
Car13	38.9969	2.37993	4.54196	1.41481e-38	Up
Car14	0.229121	6.89274	-4.39989	7.40568e-12	Down
Car4	157.18	108.408	1.00159	0.000886581	Up
Car8	12.3886	28.9762	-0.749331	0.000152447	Down
Card19	55.4902	30.7515	1.29761	0.0049254	Up
Carf	0.336131	0.996698	-1.09407	0.000361289	Down
Carhsp1	116.216	56.857	1.51099	2.277e-09	Up
Carmil1	16.0432	10.5317	1.08979	1.87417e-06	Up
Carmil2	0.32821	1.22872	-1.4001	0.000614203	Down
Carnmt1	1.77079	4.89637	-1.01036	0.00784185	Down
Cars	11.2062	6.64288	1.23675	1.97133e-06	Up
Cars2	1.56913	4.95255	-1.18442	1.5421e-06	Down
Casd1	6.67202	16.6266	-0.850881	0.00418613	Down
Cask	6.06107	5.31746	0.681448	0.00770013	Up
Caskin1	0.020722	0.168309	-2.55259	0.00103981	Down
Casp1	39.1035	8.23523	2.74295	1.37489e-23	Up
Casp12	11.286	7.50811	1.06579	6.29758e-06	Up
Casp3	15.6079	8.17378	1.43961	9.38332e-06	Up
Casp4	180.227	11.5345	4.47686	2.27753e-44	Up
Casp6	10.1193	23.5853	-0.738566	0.000189959	Down
Casp7	11.2822	5.98448	1.41647	1.63911e-07	Up
Casp8	38.2662	15.0252	1.86113	2.92587e-08	Up
Casp8ap2	3.54905	3.27722	0.592799	0.00809999	Up
Cast	31.8788	24.0782	0.894542	9.52724e-06	Up
Castor1	1.16952	5.24776	-1.69791	7.04477e-07	Down
Casz1	3.64023	8.62415	-0.774469	0.00616325	Down
Cat	57.6533	156.713	-0.953741	6.08404e-07	Down
Cav1	58.7988	529.384	-2.68164	1.06298e-10	Down
Cav2	23.197	150.49	-2.25482	3.80503e-06	Down
Cavin1	25.4364	157.17	-2.1287	1.65699e-11	Down
Cavin2	21.0338	262.657	-3.15499	1.09669e-12	Down
Cavin4	0.0208701	0.458253	-3.97987	1.13339e-05	Down
Cbarp	0.996365	3.14957	-1.17381	1.27117e-05	Down
Cbfa2t3	1.36146	11.348	-2.59848	2.0491e-11	Down
Cblb	8.35375	5.89835	1.00299	0.000385647	Up
Cbr1	13.7653	38.0353	-0.971468	2.78416e-06	Down
Cbr2	1669.03	4592.16	-0.976693	2.15057e-06	Down
Cbx2	0.221831	0.957577	-1.61989	2.98541e-05	Down
Cbx3	10.0503	24.7329	-0.825273	0.000693188	Down
Cbx5	6.79063	15.3434	-0.691534	2.56541e-05	Down
Cbx6	8.35756	33.9469	-1.53372	1.43192e-16	Down
Cbx7	3.09913	11.0472	-1.36107	1.00627e-06	Down
Cbx8	0.854019	5.15559	-2.13072	2.82611e-06	Down
Cc2d2a	0.767009	3.57467	-1.71442	2.89329e-08	Down
Ccbe1	1.72449	4.03615	-0.729182	0.00515763	Down
Ccdc102a	2.47992	6.24081	-0.860204	0.00921462	Down
Ccdc107	11.1841	27.425	-0.830201	0.00532841	Down
Ccdc122	4.1496	2.44631	1.26851	9.03212e-05	Up
Ccdc142	0.353271	1.99404	-2.0428	6.59557e-05	Down
Ccdc159	0.15367	0.975336	-2.19578	0.000127606	Down
Ccdc166	0.748027	2.59286	-1.32673	0.00331541	Down
Ccdc174	7.64682	6.44192	0.736668	0.000196436	Up
Ccdc187	0.801414	1.89749	-0.756766	0.0103797	Down
Ccdc190	0.427325	0.0611323	3.31649	1.47496e-05	Up
Ccdc25	35.1732	14.9077	1.75908	3.31107e-05	Up
Ccdc28b	1.59438	7.68204	-1.79937	8.67016e-07	Down
Ccdc47	22.5972	47.738	-0.603157	0.00134855	Down
Ccdc61	2.91383	6.28569	-0.62046	0.00658859	Down
Ccdc63	0.63634	0.0391337	4.53664	6.64084e-11	Up
Ccdc68	1.82233	9.03271	-1.834	7.95035e-07	Down
Ccdc71l	10.6431	8.77823	0.747903	0.00458341	Up
Ccdc8	0.245409	4.09813	-3.57707	4.23205e-20	Down
Ccdc85a	0.228255	1.26826	-2.04012	0.000354262	Down
Ccdc85b	3.5646	17.9393	-1.88018	2.98081e-06	Down
Ccdc85c	1.71173	4.60118	-0.959002	0.000476759	Down
Ccdc86	11.1974	3.73246	2.08876	6.13133e-10	Up
Ccdc88b	14.8446	3.40977	2.6074	2.93479e-16	Up
Ccdc92	2.54553	7.42249	-1.05302	0.000376268	Down
Ccdc93	1.67793	3.72001	-0.673039	0.00316237	Down
Ccin	0.147273	0.016263	3.70001	0.0128188	Up
Cckar	13.0674	32.1948	-0.817008	0.00492851	Down
Ccl11	37.0543	2.6453	4.33059	2.35653e-21	Up
Ccl12	27.3598	5.34443	2.85996	6.43505e-08	Up
Ccl17	39.8009	4.60626	3.57901	3.17666e-31	Up
Ccl19	21.6331	1.36731	4.48551	2.28129e-40	Up
Ccl2	193.256	2.34263	6.92146	2.86919e-11	Up
Ccl22	87.5855	7.59892	4.04505	4.74444e-27	Up
Ccl3	134.027	1.66172	6.88485	3.01617e-27	Up
Ccl4	155.479	1.99888	6.84724	2.54374e-21	Up
Ccl5	822.035	68.8337	4.12498	4.2641e-11	Up
Ccl6	289.387	123.894	1.66674	0.000160743	Up
Ccl7	40.3153	3.92479	3.91115	3.5054e-08	Up
Ccl9	54.0482	9.91565	2.96629	4.32482e-11	Up
Ccn6	0.175215	0.443081	-0.85151	0.00586667	Down
Ccnd2	42.6335	23.5342	1.35843	2.46526e-05	Up
Ccnd3	88.9193	68.2356	0.852525	0.000729718	Up
Ccnl1	15.3773	9.33662	1.19602	3.25062e-05	Up
Ccr1	75.4848	6.40305	4.02567	1.00815e-51	Up
Ccr5	9.80197	2.58887	2.45401	3.83409e-05	Up
Ccr7	39.2187	8.69321	2.68744	1.05485e-13	Up
Ccrl2	155.355	15.5878	3.82656	1.07038e-19	Up
Cct3	67.0373	53.8953	0.813179	0.00640365	Up
Ccz1	31.4817	27.4058	0.681774	6.6299e-05	Up
Cd101	0.359235	1.54141	-1.64414	2.50621e-05	Down
Cd14	368.646	22.6322	4.53452	3.74802e-42	Up
Cd163	0.207463	1.71104	-2.54581	4.61694e-07	Down
Cd164	158.011	111.983	0.967896	7.84119e-05	Up
Cd177	32.7313	2.23254	4.38155	4.30429e-22	Up
Cd19	1.95968	6.21459	-1.14654	0.00359265	Down
Cd1d1	1.7176	4.44337	-0.887417	1.72101e-05	Down
Cd200	155.564	94.2914	1.20797	1.52217e-12	Up
Cd207	0.177114	1.44596	-2.57737	0.000273089	Down
Cd209b	0.0239813	0.471765	-3.8486	0.00425547	Down
Cd209d	0.00854288	0.350168	-4.84305	0.0102063	Down
Cd209f	0.103272	0.80597	-2.47052	0.000818568	Down
Cd209g	0.0144363	0.476393	-4.57119	0.00171187	Down
Cd244a	5.06391	2.30373	1.65443	0.000290452	Up
Cd248	0.283856	3.59801	-3.1377	3.61964e-06	Down
Cd24a	218.996	184.241	0.740311	3.67751e-05	Up
Cd274	259.46	6.75981	5.77757	6.20298e-49	Up
Cd300a	20.9833	6.3236	2.22398	5.56902e-08	Up
Cd300e	4.59637	2.56035	1.37684	0.00855846	Up
Cd300lf	99.637	6.88522	4.32415	2.66027e-35	Up
Cd300lg	0.883803	6.94184	-2.48444	1.56313e-13	Down
Cd302	93.5707	29.3524	2.14634	3.4886e-23	Up
Cd33	24.8067	3.45077	3.30499	3.54898e-14	Up
Cd36	77.6157	253.058	-1.22823	0.000360171	Down
Cd38	26.2941	22.0692	0.736432	0.0014211	Up
Cd40	117.244	7.83989	4.42179	1.03773e-28	Up
Cd44	80.0381	28.3003	1.98706	5.2156e-16	Up
Cd47	91.4492	22.0049	2.53881	2.78783e-29	Up
Cd52	333.663	153.344	1.6402	0.000287573	Up
Cd53	134.859	29.2999	2.68661	5.26043e-35	Up
Cd63	163.07	127.47	0.851703	7.95618e-05	Up
Cd68	50.0318	25.7139	1.43615	1.51966e-05	Up
Cd69	20.8422	3.71933	3.01675	1.02458e-09	Up
Cd70	0.160225	0	5.33634	0.0100138	Up
Cd74	1198.65	989.5	0.785027	0.010955	Up
Cd79a	9.00437	32.4318	-1.31797	0.00570789	Down
Cd79b	11.8328	30.3429	-0.850122	0.00640874	Down
Cd80	8.43102	0.587048	4.34943	5.3931e-48	Up
Cd81	36.889	92.5918	-0.846332	0.00068743	Down
Cd82	79.6723	63.7444	0.8319	0.00819037	Up
Cd83	31.0697	9.75051	2.17851	8.55669e-11	Up
Cd84	6.74478	4.59189	1.03193	0.00423451	Up
Cd86	17.5761	4.02941	2.66706	1.78142e-06	Up
Cd99l2	5.54186	16.3788	-1.07879	1.86234e-08	Down
Cdc14b	0.304286	1.26424	-1.5812	4.95103e-08	Down
Cdc23	3.3399	7.41743	-0.669637	0.0027679	Down
Cdc34	35.0178	31.9678	0.609751	0.00245997	Up
Cdc42bpa	3.56921	9.98062	-0.996562	2.57982e-06	Down
Cdc42ep1	17.232	56.8306	-1.26829	0.00171877	Down
Cdc42ep2	37.3727	24.3408	1.09489	1.25849e-05	Up
Cdc42ep4	60.6619	46.1215	0.866085	0.00160237	Up
Cdc42ep5	3.04922	7.39468	-0.792739	0.0113205	Down
Cdc42se1	65.3078	48.6038	0.91088	0.000322459	Up
Cdh1	105.181	91.4566	0.695371	0.00379421	Up
Cdh19	0.00308282	0.0355048	-2.98985	0.00472801	Down
Cdh2	0.133502	0.826104	-2.11469	1.46306e-05	Down
Cdh22	0.0425452	0.259843	-2.08409	0.0149146	Down
Cdh23	0.163444	0.0388002	2.53251	4.45641e-07	Up
Cdh4	0.121499	0.672888	-1.94746	0.00734538	Down
Cdh5	339.561	200.042	1.22945	5.94396e-05	Up
Cdip1	5.27625	11.8541	-0.693131	0.00541902	Down
Cdk10	5.10347	11.4764	-0.680004	0.00124255	Down
Cdk12	2.56195	2.38238	0.596854	0.00246583	Up
Cdk2ap1	13.1774	28.0376	-0.613611	0.00519545	Down
Cdk5	2.7833	7.18457	-0.885262	2.73059e-05	Down
Cdk5r1	0.645012	0.295531	1.61788	3.09938e-05	Up
Cdkl3	0.546731	0.463694	0.737561	0.00915187	Up
Cdkl5	1.50072	5.01796	-1.2784	0.00443982	Down
Cdkn1a	285.97	33.9349	3.56124	9.82822e-53	Up
Cdkn1c	8.52528	30.7593	-1.35641	6.93084e-05	Down
Cdkn2c	2.45036	10.2231	-1.56829	2.65556e-08	Down
Cdkn2d	46.98	14.2381	2.21464	2.41382e-26	Up
Cdnf	0.15839	0.722119	-1.67738	0.00429109	Down
Cdon	0.203883	0.834208	-1.53126	2.44724e-07	Down
Cdt1	4.91834	3.26299	1.07241	1.04026e-05	Up
Cdyl2	1.01703	0.86965	0.707075	0.0101224	Up
Ceacam1	38.8356	14.6247	1.89908	6.60432e-16	Up
Ceacam10	1.84165	0.153114	4.05643	2.08393e-11	Up
Ceacam19	0.134702	0.0290168	2.64932	0.00864389	Up
Ceacam2	0.133037	0.0390286	2.28243	0.0118219	Up
Cebpb	395.059	81.9417	2.71074	1.92443e-07	Up
Cebpd	336.904	71.2725	2.68604	7.85265e-07	Up
Cebpe	1.89062	0.100776	4.68171	7.83233e-08	Up
Cebpzos	2.91427	6.82914	-0.750993	0.000521177	Down
Cecr2	2.19698	1.72619	0.826948	0.000830625	Up
Celsr3	0.413026	0.0379358	3.90438	6.63216e-08	Up
Cemip	0.272762	0.0359669	3.39154	7.96513e-11	Up
Cend1	0.0183438	0.237646	-3.21937	0.00284544	Down
Cenpj	3.02376	2.49938	0.768593	0.00103151	Up
Cenpl	2.58925	1.91217	0.930676	0.004791	Up
Cenpm	1.15825	0.308677	2.38572	1.60983e-05	Up
Cenpq	0.952454	0.552797	1.27122	2.01543e-07	Up
Cenpv	2.31594	6.51297	-1.00815	2.27792e-05	Down
Cenpx	5.0793	13.0572	-0.895606	0.00100005	Down
Cep131	0.95622	2.75604	-1.03113	0.000827317	Down
Cep250	1.47729	3.56058	-0.78441	0.000429188	Down
Cep350	6.2614	5.69347	0.634527	0.0111682	Up
Cep68	2.12398	6.88111	-1.22477	2.98295e-05	Down
Cep97	0.415446	1.34353	-1.19386	2.07891e-05	Down
Cept1	12.7144	7.69036	1.18707	0.000101606	Up
Cerk	13.4617	9.97791	0.904002	0.00217704	Up
Cerox1	0.00572073	0.418112	-5.5745	0.0001284	Down
Cers4	1.71045	6.92473	-1.53082	2.04234e-16	Down
Cers5	11.6895	30.5155	-0.902365	3.33044e-06	Down
Cers6	5.39188	2.11308	1.84967	3.41175e-13	Up
Ces1e	2.64128	7.43824	-1.00364	0.000327862	Down
Ces1f	1.95237	7.72882	-1.49453	2.48011e-06	Down
Ces1g	1.20297	6.67945	-1.97232	9.67737e-11	Down
Ces1h	0.0133242	0.182183	-3.2569	0.0150607	Down
Ces2b	0.144005	1.18241	-2.57144	1.61736e-06	Down
Ces2e	0.230561	1.57103	-2.28448	4.57978e-05	Down
Ces2g	2.43539	8.27814	-1.26414	0.00394468	Down
Cfap100	0.371557	0.942501	-0.833453	0.0142411	Down
Cfap53	7.74108	4.96659	1.15257	0.000650224	Up
Cfap69	10.3014	3.79006	1.93087	5.21922e-18	Up
Cfb	285.977	20.7467	4.3133	4.9295e-15	Up
Cfl1	654.229	481.616	0.93251	3.01451e-06	Up
Cflar	63.998	21.7952	2.03452	7.00829e-19	Up
Cfp	34.748	9.98945	2.27136	1.04082e-18	Up
Cgas	3.67598	1.19329	2.15057	1.96442e-05	Up
Ch25h	46.0428	4.73701	3.75481	9.80185e-39	Up
Chac1	5.78737	1.91028	2.05924	2.01461e-05	Up
Chadl	0.0677021	0.3523	-1.8873	0.00237206	Down
Chchd10	24.9163	60.5486	-0.80143	0.00123478	Down
Chd2	9.66569	7.7893	0.807838	0.000595901	Up
Chd3	7.53125	19.9904	-0.923506	0.00294433	Down
Chd7	10.4174	3.48459	2.07333	1.01788e-12	Up
Chek2	0.459117	1.21012	-0.917076	0.0066775	Down
Chic2	23.1836	14.3268	1.16783	2.32049e-08	Up
Chil1	848.025	476.359	1.31184	4.8871e-15	Up
Chil3	659.97	326.347	1.44979	0.00450764	Up
Chil5	0.161943	0.0192641	3.54568	1.67632e-05	Up
Chml	0.828733	2.99678	-1.39079	1.42917e-05	Down
Chmp1a	38.8261	35.5517	0.604326	0.00096597	Up
Chmp2a	110.85	98.0362	0.658155	4.18433e-05	Up
Chmp4b	486.177	133.428	2.36314	8.81688e-25	Up
Chp1	75.2001	68.5416	0.613703	0.000236726	Up
Chp2	0.0159364	0.979529	-5.44146	6.76577e-10	Down
Chrac1	38.7274	33.8501	0.673126	0.00243639	Up
Chrdl1	0.919333	3.07512	-1.22779	0.00504312	Down
Chrm1	0.00273807	0.198931	-5.73459	1.67624e-05	Down
Chrm2	0.652913	3.48444	-1.89345	5.93576e-05	Down
Chst11	4.98623	3.40516	1.04424	4.37134e-05	Up
Chst13	1.39249	0.00999815	7.57642	1.87696e-08	Up
Chst14	2.45047	8.60934	-1.33553	1.58924e-06	Down
Chst15	19.4036	10.191	1.41323	7.38017e-13	Up
Chst2	0.355856	6.1166	-3.62607	1.37139e-47	Down
Chst3	0.383462	1.39472	-1.36329	7.60117e-06	Down
Chst4	0.356654	1.67281	-1.73815	5.56911e-05	Down
Chst5	0.136129	1.31241	-2.77888	6.52772e-06	Down
Chst7	0.730503	3.23347	-1.65664	1.8106e-07	Down
Chst8	0.340616	1.5836	-1.72475	0.00369168	Down
Ciao2b	34.0417	24.9962	0.911009	0.00334724	Up
Ciart	2.22434	7.34418	-1.25329	0.00269633	Down
Cisd1	16.7272	38.8835	-0.736739	0.000307906	Down
Cish	19.0857	11.1318	1.26631	4.08585e-05	Up
Cited4	3.23441	0.917933	2.31128	1.00592e-10	Up
Ckap4	29.4558	20.0604	1.03829	4.80359e-11	Up
Ckb	5.12834	33.1087	-2.16351	5.6591e-05	Down
Cks2	26.5411	10.4156	1.82217	7.05696e-08	Up
Clca3a1	2.1474	0.688545	2.15335	4.26197e-07	Up
Clcf1	1.42371	3.91987	-0.97058	0.000114743	Down
Clcn7	13.8847	11.1867	0.781564	0.00465893	Up
Cldn2	2.20691	0.219886	3.86403	2.19423e-06	Up
Cldn34c1	0.0569792	0.350257	-2.16736	0.000475676	Down
Cldn5	340.162	262.91	0.835244	0.00254458	Up
Cldn8	0.29852	2.18749	-2.37128	1.9303e-08	Down
Clec11a	1.49535	4.98407	-1.22449	0.0102581	Down
Clec12b	0.296644	2.31125	-2.45995	5.03059e-06	Down
Clec14a	17.6658	85.8812	-1.83769	0.00193678	Down
Clec1a	2.24124	35.5975	-3.53817	1.84678e-18	Down
Clec2d	308.578	162.29	1.38218	0.000175957	Up
Clec3b	35.6601	119.036	-1.2498	2.31934e-06	Down
Clec4a1	53.2109	9.62457	3.02125	4.11107e-06	Up
Clec4a2	7.29969	3.36294	1.58117	4.57998e-05	Up
Clec4a3	34.6451	13.5264	1.86385	3.34222e-05	Up
Clec4a4	0.633909	0.16106	2.48016	0.00499017	Up
Clec4d	103.846	8.26906	4.10957	3.56276e-32	Up
Clec4e	55.3771	1.64804	5.5559	6.6677e-71	Up
Clec5a	12.0512	1.52142	3.47748	2.39735e-46	Up
Clic1	322.415	161.343	1.48149	1.16264e-17	Up
Clic3	33.7158	89.5347	-0.931124	0.00130272	Down
Clic4	1085.58	256.059	2.57705	1.26722e-12	Up
Clint1	40.5524	32.2499	0.819872	9.0507e-05	Up
Clip2	6.86545	3.92891	1.28036	2.36752e-10	Up
Clip3	0.323246	1.18005	-1.37903	4.63328e-05	Down
Clip4	11.5923	6.78439	1.25545	2.70232e-09	Up
Clmp	2.56932	1.1371	1.68661	2.00088e-05	Up
Cln3	5.81965	4.5973	0.826339	6.22497e-05	Up
Cln6	7.01732	15.7844	-0.681337	0.00465366	Down
Clp1	10.3669	8.43132	0.790497	7.01213e-05	Up
Clstn1	20.7108	65.8515	-1.17915	0.000151897	Down
Cltb	61.0283	51.8472	0.721953	0.000366696	Up
Cmah	0.781426	2.2736	-1.05519	0.000927604	Down
Cmbl	2.50908	7.89057	-1.13299	0.0138798	Down
Cmip	35.3549	17.6282	1.50044	3.03635e-11	Up
Cmpk1	57.5466	47.2574	0.753597	0.00136627	Up
Cmpk2	293.528	16.0981	4.72834	4.541e-20	Up
Cmtm4	5.05253	14.8825	-1.0749	2.70505e-06	Down
Cmtm6	60.7439	45.8479	0.887093	5.72027e-07	Up
Cmtm8	7.4944	28.9011	-1.48587	3.87155e-06	Down
Cmtr1	1.04547	0.379859	1.94145	4.63848e-09	Up
Cndp2	39.0558	30.0167	0.852349	0.000102705	Up
Cngb1	0.0215922	0.183365	-2.56566	0.0109888	Down
Cngb3	0.428486	0.0282181	4.41407	1.42181e-07	Up
Cnih1	22.0011	51.0535	-0.733887	0.000214207	Down
Cnksr1	10.6008	5.28796	1.48408	1.56756e-09	Up
Cnksr2	0.0868356	0.330052	-1.43893	4.36685e-05	Down
Cnn3	254.354	107.293	1.74134	2.17542e-06	Up
Cnnm4	2.89547	2.17333	0.897315	0.00109977	Up
Cnp	32.0946	22.5591	1.00746	1.72445e-05	Up
Cnpy4	4.40653	12.9109	-1.05373	0.00103066	Down
Cnrip1	1.1385	5.88454	-1.89484	1.80962e-09	Down
Cnst	4.16567	11.4799	-0.985198	0.00031959	Down
Cntln	0.74202	2.11673	-1.00661	0.00409681	Down
Cntn1	0.0210874	0.0914167	-1.63804	0.0106533	Down
Cntrl	8.18253	5.58686	1.06251	0.0010147	Up
Coa8	3.87316	9.78884	-0.85316	1.99181e-06	Down
Coch	1.29224	0.13929	3.70017	1.02431e-18	Up
Cog2	10.7624	9.11589	0.72308	4.34558e-05	Up
Cog5	2.08399	4.85978	-0.75521	0.00516089	Down
Col12a1	1.45001	3.98457	-0.985044	0.0130899	Down
Col15a1	3.72026	2.36702	1.17528	0.00651707	Up
Col17a1	0.0648698	0.798401	-3.09985	4.62751e-06	Down
Col18a1	9.95028	6.11992	1.20854	0.000231171	Up
Col22a1	0.403389	0.0136323	5.37793	9.34112e-25	Up
Col25a1	0.0746063	0.0253969	2.02061	0.00375159	Up
Col4a1	287.279	125.597	1.656	4.36475e-07	Up
Col4a2	194.649	105.099	1.35592	7.47591e-06	Up
Col8a1	0.424706	2.34389	-1.95304	0.000726693	Down
Col9a3	0.835617	0.14301	3.0684	1.48646e-07	Up
Colgalt2	0.281362	5.47019	-3.78774	3.78247e-20	Down
Colq	0.91374	5.60749	-2.11077	9.60579e-08	Down
Commd10	2.3867	6.08168	-0.846437	0.00613495	Down
Comt	7.84691	18.1092	-0.728077	8.50823e-05	Down
Cops2	34.6848	28.9234	0.731102	0.00276037	Up
Copz2	5.05931	22.752	-1.66685	1.93191e-06	Down
Coq8a	0.936991	2.34785	-0.819445	0.0109114	Down
Coq8b	5.55654	4.78413	0.69936	6.08907e-05	Up
Coro1a	143.218	83.7516	1.2564	0.000434157	Up
Coro2a	9.78975	7.17598	0.953004	0.00063047	Up
Coro2b	1.74807	9.08806	-1.91914	1.30678e-06	Down
Cotl1	85.4413	56.2574	1.09345	0.000125248	Up
Cox15	6.65864	4.51916	1.05576	8.40178e-05	Up
Cox18	4.91499	2.79374	1.3113	2.60113e-07	Up
Cox4i2	22.8331	79.2948	-1.31843	2.05726e-07	Down
Cox6b2	4.90946	16.3026	-1.22441	0.0080743	Down
Cox7a2l	67.4632	150.585	-0.6742	0.000782743	Down
Cp	85.4581	39.659	1.6127	7.31718e-09	Up
Cpeb1	0.76245	1.87202	-0.812964	0.0038215	Down
Cpeb3	1.59591	1.33181	0.75343	0.00809944	Up
Cpeb4	27.2694	9.91835	1.93805	7.40288e-13	Up
Cped1	6.81861	19.991	-1.05857	0.00873012	Down
Cplane1	0.991818	2.17674	-0.64595	0.000312452	Down
Cpn1	0.791323	2.52085	-1.20262	0.000501311	Down
Cpne1	29.6269	24.8241	0.739472	0.000147652	Up
Cpne2	14.0348	4.00273	2.28059	1.40445e-11	Up
Cpne8	8.44882	4.5174	1.39932	0.00047375	Up
Cpne9	0.047976	0	6.13762	0.000397113	Up
Cpped1	1.94821	5.02249	-0.883481	3.42913e-06	Down
Cpsf2	10.7914	7.07428	1.11408	0.0010285	Up
Cpt1a	26.5079	24.4404	0.596021	0.0143915	Up
Cpt1c	0.393912	1.31334	-1.2387	0.000889768	Down
Cr1l	68.6041	43.8993	1.13269	4.14651e-08	Up
Cr2	0.0604374	0.673204	-2.98226	8.15297e-09	Down
Crabp1	0	0.497093	-5.94521	0.000427731	Down
Cracr2b	15.6783	46.718	-1.11231	0.00187201	Down
Crb1	0.0050311	0.0392299	-2.49131	0.00320158	Down
Crbn	17.3748	14.9039	0.694565	0.00248945	Up
Creb1	4.90442	10.3717	-0.606237	0.00692652	Down
Creb3l1	13.3461	6.41468	1.56333	1.52768e-06	Up
Creb5	1.57204	0.83949	1.39909	0.00426942	Up
Creld1	6.35152	13.8759	-0.653506	0.00658241	Down
Creld2	49.8183	33.0266	1.06553	0.00276191	Up
Crem	4.41257	2.08112	1.55133	2.02508e-08	Up
Crip1	144.533	357.438	-0.820537	4.21839e-05	Down
Crip2	83.7122	288.131	-1.3112	9.23933e-07	Down
Crispld2	46.6141	33.3905	0.968501	4.62427e-09	Up
Crlf2	32.5266	13.2867	1.76337	5.90831e-16	Up
Crocc	0.22156	1.1959	-1.94591	5.37671e-15	Down
Crp	0.421356	0.0197656	4.86818	0.00101752	Up
Crtam	1.34491	0.46775	2.06161	0.00495926	Up
Crtap	8.35183	21.9466	-0.893858	0.00602562	Down
Crtc2	18.4305	13.6005	0.927199	3.6372e-06	Up
Cry1	9.6859	8.25887	0.721094	0.000326589	Up
Cryab	41.3128	101.388	-0.800896	0.00969395	Down
Crybg1	16.3145	3.79428	2.62064	1.7015e-13	Up
Crybg3	13.883	9.51086	1.0314	0.00123814	Up
Cryl1	4.2018	13.4976	-1.18413	0.000128337	Down
Cryz	0.985078	3.42097	-1.291	0.000111326	Down
Cryzl2	1.22711	3.52156	-1.0125	0.0108147	Down
Csad	2.85711	8.37855	-1.07338	2.21571e-07	Down
Csf1	59.908	10.6142	3.01604	1.32233e-15	Up
Csf2	8.30144	2.3459	2.29933	1.68291e-11	Up
Csf2ra	4.52107	2.40436	1.39509	7.57606e-13	Up
Csf2rb	45.3932	9.99237	2.64929	2.15388e-20	Up
Csf2rb2	10.7064	2.68832	2.46779	7.74204e-14	Up
Csf3	29.8258	0	14.1143	6.31115e-31	Up
Csf3r	52.3931	12.7503	2.51128	1.18071e-21	Up
Cspg4	0.76416	2.89602	-1.4373	2.34902e-10	Down
Csrnp1	88.9155	16.7322	2.88392	1.20862e-13	Up
Csrp1	313.269	221.683	0.990285	5.24547e-05	Up
Csrp2	13.2063	49.6399	-1.42366	2.19103e-06	Down
Cst7	5.69608	1.90682	2.11304	0.000959561	Up
Cst8	1.32642	6.5937	-1.83887	1.79465e-09	Down
Csta2	20.2252	2.0097	3.771	2.76129e-11	Up
Csta3	5.22885	0.199682	5.21641	9.73764e-09	Up
Cstad	0.0308724	0.671385	-3.9531	0.000690653	Down
Cstb	146.329	97.1728	1.05694	0.000219797	Up
Cstdc2	1.72798	8.96926	-1.88743	4.27588e-13	Down
Cstdc4	120.253	2.78693	5.92908	7.45434e-30	Up
Cstdc5	3.96734	0.0564669	6.60355	2.23852e-11	Up
Ctdp1	2.72986	2.14661	0.839255	2.83159e-05	Up
Ctdspl	5.92532	19.7048	-1.25704	2.21889e-09	Down
Cthrc1	0.322198	3.95549	-3.11959	5.02639e-08	Down
Ctla2a	556.945	172.874	2.16124	7.89505e-19	Up
Ctla2b	77.6792	23.7567	2.1564	2.07571e-07	Up
Ctla4	2.9345	1.1426	1.91818	0.0059025	Up
Ctnnal1	2.40613	6.6421	-0.994435	0.00165956	Down
Ctnnbip1	1.7809	4.67723	-0.918496	0.000320793	Down
Ctps	51.7275	14.2444	2.34994	2.75086e-18	Up
Ctsb	218.764	111.728	1.46634	1.12947e-10	Up
Ctsc	40.4834	30.495	0.887821	7.19213e-05	Up
Ctsf	3.14252	10.2198	-1.20781	9.76103e-06	Down
Ctsg	1.77251	0.117649	4.46347	3.22048e-05	Up
Ctsh	273.825	232.197	0.704519	0.0083857	Up
Ctss	390.123	186.556	1.54515	8.87969e-11	Up
Ctsz	190.583	110.791	1.27115	7.82452e-10	Up
Cttnbp2	0.110818	0.904651	-2.55719	1.57979e-09	Down
Cuedc1	3.54357	12.6287	-1.33761	3.24094e-08	Down
Cul3	26.9823	24.2266	0.648389	0.00359387	Up
Cul7	3.06511	6.53843	-0.621848	0.0102749	Down
Cuta	16.7841	38.7263	-0.721708	4.56715e-06	Down
Cutal	0.492306	4.80461	-2.81452	4.60661e-18	Down
Cutc	11.131	6.89193	1.19854	0.000402212	Up
Cwc25	9.95634	6.50611	1.09946	1.59668e-06	Up
Cwf19l2	5.0398	3.87438	0.863432	6.63693e-05	Up
Cx3cl1	41.8406	22.3015	1.38345	3.70302e-09	Up
Cx3cr1	0.361903	6.68152	-3.66542	4.88105e-09	Down
Cxcl1	125.601	0.335837	9.0253	1.14328e-50	Up
Cxcl10	2982.37	13.0383	8.42107	9.44818e-11	Up
Cxcl12	4.73415	32.7179	-2.29554	5.1214e-11	Down
Cxcl13	52.2415	4.08377	4.19622	8.68599e-19	Up
Cxcl14	52.3456	41.3623	0.840901	0.000644857	Up
Cxcl16	148.704	51.5341	2.01423	5.9442e-34	Up
Cxcl2	160.112	0.199397	10.1522	3.97953e-103	Up
Cxcl3	15.5533	0.0972993	7.81698	1.79669e-32	Up
Cxcl5	5.33822	0.085931	6.54229	8.4278e-07	Up
Cxcl9	870.853	4.17495	8.24058	9.55472e-12	Up
Cxcr2	60.2721	6.8833	3.60014	1.04689e-19	Up
Cxxc4	0.0137006	0.06717	-1.79076	0.0027255	Down
Cxxc5	0.678005	1.72421	-0.847317	0.00122456	Down
Cyb5r1	6.10091	13.1502	-0.628576	0.0099292	Down
Cyb5r4	29.5545	25.6158	0.684151	0.000231756	Up
Cyb5rl	0.340527	1.07025	-1.15608	9.2262e-05	Down
Cyba	227.156	120.945	1.38373	2.34506e-08	Up
Cybb	81.2149	19.854	2.54833	9.11239e-09	Up
Cybc1	24.6171	19.218	0.840442	0.00109843	Up
Cybrd1	0.533575	3.9179	-2.38543	1.23542e-11	Down
Cycs	31.9047	15.2308	1.53181	1.43968e-08	Up
Cyfip1	25.127	17.8448	0.972908	3.81945e-07	Up
Cyfip2	4.29063	2.86662	1.09289	0.00430166	Up
Cygb	5.04347	16.0575	-1.16072	0.000419616	Down
Cyp1a1	0.851023	15.2866	-3.71088	5.90681e-14	Down
Cyp20a1	5.56665	15.873	-1.02372	7.82532e-07	Down
Cyp26b1	0.0382477	1.1042	-4.31002	1.87569e-11	Down
Cyp27b1	0.302118	0.0148515	4.81111	4.74469e-11	Up
Cyp2d22	4.69455	15.424	-1.22519	1.53172e-08	Down
Cyp2f2	461.943	1545.61	-1.2452	2.58115e-06	Down
Cyp2j9	0.349702	2.21978	-2.15573	3.3251e-07	Down
Cyp39a1	6.36098	13.3686	-0.59097	0.00326798	Down
Cyp46a1	0.014636	0.163743	-2.97866	0.00384721	Down
Cyp4f18	6.66761	5.78889	0.691345	0.00613736	Up
Cyp7b1	5.71386	1.64766	2.31282	2.4145e-08	Up
Cyren	0.545658	2.12933	-1.48777	1.32414e-07	Down
Cyria	10.6239	8.37118	0.846488	0.0121655	Up
Cyrib	7.03093	3.19477	1.6212	1.14154e-15	Up
Cys1	1.84022	14.1048	-2.42398	1.71928e-08	Down
Cysltr2	1.96079	0.806118	1.81991	0.00107569	Up
Cyth1	22.1604	14.1755	1.11996	6.04426e-09	Up
Cyth4	36.0945	15.3737	1.74387	1.00326e-06	Up
Cytip	28.4463	18.7897	1.06311	5.61001e-05	Up
Cytl1	3.59959	17.4623	-1.78705	2.12824e-08	Down
D030025P21Rik	0.0258719	0.212728	-2.54832	0.00373407	Down
D10Wsu102e	11.958	7.16096	1.23852	3.71514e-07	Up
D16Ertd472e	8.9736	4.04025	1.65948	5.27203e-05	Up
D17H6S56E-5	216.102	36.1692	3.08991	1.47806e-22	Up
D2hgdh	0.592976	2.5356	-1.61165	2.32819e-09	Down
D330022H12Rik	0.058304	0.492862	-2.61762	0.00160597	Down
D3Ertd751e	0.585142	2.19499	-1.43196	5.14136e-07	Down
D430019H16Rik	0.0791913	2.22169	-4.31027	3.57489e-21	Down
D430020J02Rik	0.752394	0.250566	2.08874	9.30301e-06	Up
D5Ertd615e	0.0370646	0	5.49659	0.00930822	Up
D630045J12Rik	0.196637	1.16152	-2.06096	1.51359e-05	Down
D6Ertd474e	0.0830676	0.00303731	5.17801	0.00126325	Up
D730003I15Rik	1.11781	5.17461	-1.72203	3.17075e-05	Down
D730003K21Rik	0.434035	0.0800618	2.95745	0.00190531	Up
D730005E14Rik	4.88173	1.38606	2.29941	1.25108e-10	Up
D830026I12Rik	0.348943	3.34748	-2.77986	2.61234e-08	Down
D930028M14Rik	0.306851	0.0234246	4.22422	0.00545003	Up
D930048N14Rik	0.130576	1.31219	-2.85789	6.56824e-12	Down
Dab2	20.0397	8.88465	1.64638	6.1402e-11	Up
Dab2ip	6.95855	18.6365	-0.95093	0.000131664	Down
Dact3	0.34507	5.20736	-3.42974	4.75248e-36	Down
Dagla	0.588707	2.02432	-1.31699	0.00183518	Down
Daglb	1.83044	5.57464	-1.12137	6.30503e-06	Down
Dapl1	0.208736	1.98294	-2.71256	0.00281455	Down
Dapp1	7.69023	5.85881	0.900944	0.00379201	Up
Daxx	137.732	14.6447	3.76236	5.38888e-17	Up
Dbn1	64.2203	4.10286	4.45809	9.82749e-86	Up
Dbndd2	3.86104	9.66137	-0.85784	0.00250147	Down
Dbnl	71.2157	35.3165	1.49856	1.13198e-14	Up
Dbp	8.47383	68.6385	-2.56091	4.03755e-12	Down
Dcaf13	25.0951	22.9157	0.62809	0.0101992	Up
Dcaf4	0.274796	0.80624	-1.06816	0.00029405	Down
Dcbld1	6.823	5.17952	0.867041	0.000823687	Up
Dchs1	0.394142	2.66065	-2.28608	9.88373e-10	Down
Dck	14.0055	7.3796	1.43669	6.17893e-05	Up
Dclk2	0.659784	0.452085	1.02199	0.00545803	Up
Dclk3	0.00246176	0.656607	-7.47181	1.15061e-08	Down
Dclre1c	1.32185	0.655794	1.5216	4.82285e-06	Up
Dcp2	18.2525	8.45434	1.6187	9.79282e-06	Up
Dctd	0.467918	0.198868	1.74029	0.0133651	Up
Dctn6	8.09224	17.9132	-0.659227	6.97613e-05	Down
Dcun1d3	4.6386	4.16573	0.636783	0.00288652	Up
Ddah1	3.38281	7.51403	-0.670546	0.00283613	Down
Ddah2	6.47683	33.3083	-1.8855	2.62783e-15	Down
Ddhd2	1.33599	4.67708	-1.31915	1.07532e-11	Down
Ddi2	6.17602	3.8827	1.12867	0.00391245	Up
Ddit3	14.68	8.18089	1.31933	0.00206705	Up
Ddit4	97.8351	33.854	1.99613	3.32305e-07	Up
Ddo	0.363057	1.14505	-1.13191	0.012935	Down
Ddx21	27.5258	17.9158	1.11398	0.000220074	Up
Ddx24	55.8946	28.0811	1.5016	7.57042e-06	Up
Ddx28	9.84015	5.48691	1.31959	1.21327e-10	Up
Ddx39a	16.2125	10.7577	1.09093	5.71976e-05	Up
Ddx3x	109.418	97.9501	0.631075	0.00818506	Up
Ddx4	0.101714	0.0413872	1.76703	0.00766709	Up
Ddx41	15.4563	13.3139	0.693206	0.00220412	Up
Ddx52	14.2276	12.8503	0.627968	0.000423232	Up
Ddx54	18.7221	16.5408	0.669469	0.00243841	Up
Ddx58	101.687	16.7486	3.13069	2.98274e-12	Up
Ddx60	24.1741	2.42858	3.85524	3.22182e-10	Up
Deaf1	0.680568	2.08614	-1.13479	2.4453e-07	Down
Decr1	6.75556	16.2147	-0.782167	2.91026e-06	Down
Decr2	3.05048	8.12759	-0.930814	7.50558e-06	Down
Dedd	4.18585	3.71393	0.653311	0.000895139	Up
Degs2	0.0166869	0.134484	-2.53205	0.0149626	Down
Dek	50.6439	43.6016	0.699925	2.65097e-05	Up
Dele1	6.4215	17.9752	-1.00606	0.000144247	Down
Dennd11	1.8099	5.63876	-1.17066	0.000109721	Down
Dennd1a	6.90636	5.34107	0.862808	0.000292336	Up
Dennd1b	3.12263	2.18419	1.00337	2.90332e-08	Up
Dennd2c	0.209281	0.984357	-1.75315	1.05209e-06	Down
Dennd2d	7.49458	5.76457	0.878383	0.000297579	Up
Dennd3	45.7427	22.3863	1.50239	2.16104e-08	Up
Dennd4a	16.1794	4.04276	2.50288	3.8355e-19	Up
Dennd4b	5.30532	3.34634	1.14592	1.00441e-06	Up
Dennd6b	1.5853	1.15493	0.929529	0.000972941	Up
Depp1	83.7011	30.0121	1.94779	6.97215e-10	Up
Derl3	0.360241	1.57134	-1.6266	0.000230718	Down
Dexi	5.37038	12.3035	-0.713524	0.00217882	Down
Dgat1	13.729	6.40124	1.56592	3.04509e-06	Up
Dgat2	35.728	8.14596	2.62545	3.48671e-19	Up
Dgcr6	5.32721	14.97	-1.01517	2.06845e-05	Down
Dgke	1.64599	3.90286	-0.763408	0.0012234	Down
Dgkg	0.147741	0.437858	-1.08866	0.000684535	Down
Dgkz	4.68038	11.768	-0.872969	0.0138846	Down
Dglucy	1.02376	2.95171	-1.03024	0.000155183	Down
Dhcr24	9.08067	21.2237	-0.737125	0.000396562	Down
Dhcr7	1.05271	4.42627	-1.59339	1.42419e-10	Down
Dhdh	1.18917	4.99259	-1.57611	7.90708e-11	Down
Dhh	0.103751	0.931965	-2.68535	5.12249e-11	Down
Dhrs1	9.69875	24.9364	-0.880878	3.43898e-07	Down
Dhrs7	16.8157	40.9692	-0.795622	6.61677e-05	Down
Dhrs9	6.95197	0.607263	3.96221	2.46708e-11	Up
Dhtkd1	0.0529913	0.281431	-1.90206	0.000302215	Down
Dhx38	18.4719	11.4014	1.18479	5.19939e-12	Up
Dhx40	19.8804	15.8126	0.826036	5.12684e-05	Up
Dhx58	101.233	8.11264	4.19303	3.32936e-11	Up
Dhx8	11.0902	8.80049	0.829167	0.00028331	Up
Diaph1	40.86	33.9589	0.754701	0.000386731	Up
Diaph2	4.5697	3.34296	0.931493	2.14022e-05	Up
Dio2	6.73502	0.103598	6.5341	2.17998e-56	Up
Dip2a	2.50482	7.03563	-1.02327	0.000329548	Down
Dipk2a	4.56529	31.5159	-2.32458	1.58343e-13	Down
Dipk2b	0.0314201	1.4501	-5.06115	1.12538e-28	Down
Diras2	0.485688	2.33148	-1.76647	7.02346e-08	Down
Disp1	0.577398	1.35029	-0.735543	0.00273408	Down
Dlc1	4.14921	12.1982	-1.06201	0.000550341	Down
Dll1	28.1667	14.8302	1.42032	7.61402e-05	Up
Dll4	5.13593	31.4917	-2.14162	2.17689e-19	Down
Dmac2l	0.928409	3.14084	-1.28181	1.40904e-05	Down
Dmd	0.325304	1.34236	-1.54881	1.06636e-09	Down
Dmpk	2.2912	9.30068	-1.48766	0.0133964	Down
Dnah8	0.109057	0.473474	-1.59225	0.00359422	Down
Dnaja2	68.8419	55.9316	0.796945	0.0141762	Up
Dnajb11	38.0996	30.8696	0.78827	1.67487e-07	Up
Dnajb12	14.0861	13.0076	0.60225	0.00556069	Up
Dnajb6	34.1217	25.8419	0.905572	0.00470089	Up
Dnajc13	13.458	8.32305	1.18998	2.42152e-06	Up
Dnajc22	0.235573	0.0381249	3.11555	0.000775499	Up
Dnajc5	27.2548	24.9965	0.606618	0.000669962	Up
Dnajc5b	0.278701	0.0914928	2.11133	0.013848	Up
Dnal1	2.74144	5.89809	-0.613768	0.00551872	Down
Dnase1l1	6.53766	15.4012	-0.757792	0.000282232	Down
Dnase1l3	3.50107	0.771878	2.74247	9.39102e-05	Up
Dnhd1	0.443131	0.289112	1.10367	0.00201415	Up
Dnmt3a	1.05604	2.21835	-0.590077	0.00408928	Down
Dnttip2	25.0683	20.2839	0.800038	0.00164403	Up
Doc2b	1.7125	0.491466	2.28539	0.000349574	Up
Dock10	9.01213	4.89403	1.37288	3.69075e-12	Up
Dock11	4.22369	3.22733	0.880461	0.000495975	Up
Dock4	3.95952	9.40345	-0.760719	0.00529481	Down
Dock5	5.24672	3.75821	0.955327	0.000903231	Up
Dock6	2.36648	12.9631	-1.98481	1.41418e-12	Down
Dock7	1.38567	3.2836	-0.753573	0.00106982	Down
Dok1	22.2752	14.4709	1.11172	4.06283e-08	Up
Dok3	18.2764	6.2032	2.03213	2.08268e-08	Up
Dok4	3.02136	11.203	-1.43898	0.000321262	Down
Dok7	0.343941	0.0949831	2.33838	2.04266e-06	Up
Donson	4.16013	3.11247	0.901496	0.00258735	Up
Dpf1	0.0499806	0.376273	-2.4096	0.000262285	Down
Dph5	7.67005	2.66477	2.04877	2.18573e-05	Up
Dpp4	8.50066	20.4757	-0.786696	0.00306923	Down
Dpp9	15.0782	13.4197	0.641669	0.00289795	Up
Dpy19l4	3.01314	6.75565	-0.69786	0.00948274	Down
Dpy30	13.6288	29.0606	-0.603012	0.00181464	Down
Dpysl2	4.01961	38.3694	-2.75785	6.02062e-16	Down
Dpysl3	12.7973	9.52521	0.934064	0.0045431	Up
Dpysl5	0.0948327	2.00983	-3.91304	6.13829e-16	Down
Draxin	0.321525	0.177282	1.36769	0.00369268	Up
Dse	12.8789	7.05863	1.37749	0.00154279	Up
Dsel	1.33194	3.15928	-0.760277	0.0135229	Down
Dst	6.89781	4.4726	1.11438	0.00113007	Up
Dstyk	4.07635	9.15956	-0.692118	0.0048554	Down
Dtd1	4.30595	12.6165	-1.04902	0.000655519	Down
Dtd2	1.34084	2.95223	-0.651482	0.00462957	Down
Dtx2	13.0042	5.09445	1.83297	1.01618e-21	Up
Dtx3l	74.0624	11.9232	3.16336	3.24077e-11	Up
Duoxa2	0.677672	0.0781843	3.62828	2.38909e-06	Up
Dusp1	482.614	91.0583	2.87345	2.49103e-29	Up
Dusp16	46.8832	12.3705	2.41957	3.12309e-15	Up
Dusp2	47.8301	3.8818	4.1538	4.65049e-17	Up
Dusp22	2.48469	6.91959	-0.991281	2.3127e-07	Down
Dusp28	11.4833	6.68515	1.26064	2.40245e-06	Up
Dusp3	18.7538	59.9407	-1.21776	0.000155838	Down
Dusp5	15.9352	3.38512	2.73541	2.31934e-15	Up
Dync1h1	32.8289	27.0545	0.764957	0.00249612	Up
Dync1li2	9.55908	21.2318	-0.676392	0.0014851	Down
Dynll1	43.7026	99.3511	-0.710243	0.00194203	Down
Dynll2	29.2349	68.6943	-0.74513	2.5664e-05	Down
Dyrk1b	1.29989	2.89562	-0.675604	0.0145762	Down
Dzank1	0.531976	1.62116	-1.084	0.012872	Down
E030013I19Rik	0.0519872	1.28617	-4.14782	6.11818e-17	Down
E130308A19Rik	0.207971	0.643337	-1.14678	1.35657e-05	Down
E230013L22Rik	3.61615	1.35394	1.90255	5.52741e-06	Up
E230016M11Rik	0.0478318	0.320702	-2.27875	0.0101002	Down
Ear6	1.93976	0.0705947	5.25465	4.6732e-08	Up
Ebi3	57.1959	2.62984	4.93673	7.26653e-98	Up
Ebpl	0.950497	4.19576	-1.65222	4.33077e-10	Down
Echdc2	3.05946	11.7178	-1.45627	2.74853e-08	Down
Echdc3	0.916311	2.69584	-1.07921	0.000131717	Down
Eci1	13.719	29.6508	-0.641713	0.00771258	Down
Ecm2	1.72953	7.36868	-1.58786	1.18005e-06	Down
Edar	0.406153	0.187837	1.64203	0.00530101	Up
Edem1	18.766	14.7626	0.828374	1.55422e-05	Up
Edil3	1.06305	5.06725	-1.7967	4.97474e-05	Down
Edn1	44.1091	11.7111	2.39836	2.10155e-18	Up
Edn3	1.81954	8.68339	-1.76358	0.000100665	Down
Ednrb	2.198	23.9008	-2.93886	2.68545e-07	Down
Eef1akmt4	4.06075	1.56771	1.8552	1.46032e-07	Up
Eef2k	1.03435	3.76325	-1.37357	4.56798e-08	Down
Efcab3	0.0290421	0.00151646	4.65689	0.0148539	Up
Efcab8	0.0327873	0.00612771	2.92864	0.00411333	Up
Efcc1	0.198298	2.17527	-2.9402	6.80436e-08	Down
Efhd2	111.248	54.1072	1.52479	5.63465e-17	Up
Efna1	16.1731	55.5941	-1.31556	0.00138483	Down
Efna4	0.572559	1.88618	-1.25511	0.00347554	Down
Efnb2	4.99681	25.7045	-1.87615	1.73577e-07	Down
Efr3b	2.95893	1.30204	1.68422	1.12409e-10	Up
Egfl8	0.200509	0.868072	-1.65586	0.0126438	Down
Egflam	1.26425	8.32248	-2.19408	0.000300275	Down
Egfr	4.02392	2.00078	1.51095	0.00201878	Up
Egln1	11.2798	30.2129	-0.944425	9.32934e-07	Down
Egln2	40.7652	27.4364	1.04958	0.00019974	Up
Egln3	0.918764	0.442079	1.57402	0.00131035	Up
Egr1	25.0771	8.26958	2.09418	3.0649e-16	Up
Egr2	1.16909	0.536764	1.5939	4.11637e-09	Up
Ehbp1	0.373918	0.843947	-0.684506	0.00257291	Down
Ehd1	184.047	66.7984	1.9399	4.53816e-17	Up
Ehd2	27.9942	96.1774	-1.30652	4.64663e-06	Down
Ehf	18.7864	9.93852	1.42392	2.31552e-06	Up
Eid1	11.2033	35.2304	-1.18964	5.78253e-05	Down
Eif1a	49.3945	26.6051	1.37469	2.63123e-12	Up
Eif2ak1	22.0521	18.0569	0.787517	0.00088252	Up
Eif2ak2	50.2554	11.4096	2.67298	4.81452e-08	Up
Eif2b2	27.7732	19.8716	0.96576	1.13326e-07	Up
Eif2s1	22.1306	17.1555	0.851942	1.10374e-05	Up
Eif2s2	58.4926	35.6512	1.20137	3.64345e-11	Up
Eif3c	82.9224	69.5224	0.745214	0.000440886	Up
Eif3d	44.6323	38.4447	0.710346	0.000764736	Up
Eif4a1	229.389	174.271	0.875492	4.76264e-06	Up
Eif4e2	7.69875	6.86808	0.65574	0.00194494	Up
Eif4enif1	14.624	13.4597	0.610256	0.00760475	Up
Eif5	74.1047	56.2146	0.879501	1.47517e-07	Up
Eif5a	200.923	150.785	0.90364	3.3262e-06	Up
Eif6	78.6887	34.488	1.69437	2.1494e-07	Up
Eipr1	6.18667	5.3818	0.681081	0.00195081	Up
Elane	2.98374	0.163835	4.69927	2.35683e-13	Up
Elf1	41.6648	22.2717	1.4098	1.08119e-05	Up
Elf2	14.9066	12.6158	0.728235	0.00194029	Up
Elf3	27.9261	14.2327	1.48278	1.94384e-06	Up
Elf4	12.2447	6.96912	1.30583	7.60432e-05	Up
Elf5	3.54944	12.1065	-1.28507	2.00088e-07	Down
Elfn1	1.18347	3.81849	-1.21333	0.000646364	Down
Elk3	3.96434	24.617	-2.15771	1.08381e-29	Down
Ell	15.1118	9.47457	1.14404	3.96795e-05	Up
Ell2	15.3557	9.40156	1.19951	4.87458e-07	Up
Elmod2	6.88936	4.08642	1.24518	1.86469e-06	Up
Eloa	17.9234	14.8078	0.763323	0.000511871	Up
Elovl1	28.7567	74.9699	-0.915405	0.000501269	Down
Elovl6	4.40073	1.34492	2.23553	1.85696e-05	Up
Elp3	8.06499	17.2404	-0.608258	0.00228355	Down
Elp6	0.659977	1.68628	-0.861525	0.00418466	Down
Emc8	3.78908	8.57059	-0.689618	0.000455356	Down
Emc9	2.02562	6.79712	-1.2547	1.7328e-05	Down
Emcn	9.97785	52.264	-1.91206	1.15857e-13	Down
Emid1	1.74168	6.92201	-1.48826	0.00226817	Down
Emilin1	21.0319	15.282	0.931079	0.000264284	Up
Emilin2	19.4982	5.61081	2.28637	1.57046e-11	Up
Eml6	0.511494	1.5873	-1.15011	1.21859e-05	Down
Emp1	325.083	106.176	2.09807	8.1116e-16	Up
Enc1	10.2223	3.45814	2.05456	7.41981e-31	Up
Endod1	17.8048	13.5433	0.896207	0.00418705	Up
Endou	0.448511	3.13509	-2.30682	2.32941e-08	Down
Engase	0.940913	2.20905	-0.744502	0.00331198	Down
Enho	2.06952	15.1994	-2.43542	1.21596e-05	Down
Eno1	102.533	64.1964	1.15048	5.26272e-05	Up
Eno1b	1.45326	0.470753	2.07865	0.000410146	Up
Enpep	15.9628	45.5322	-1.03751	0.000337967	Down
Enpp1	1.20496	1.11612	0.600337	0.00858885	Up
Enpp3	1.01659	0.520049	1.47546	0.000308791	Up
Enpp4	50.411	16.2126	2.12623	1.09811e-24	Up
Enpp6	0.0833972	0.57917	-2.27764	0.00111093	Down
Entpd1	60.2933	28.7847	1.5444	2.24328e-08	Up
Entpd3	4.68785	1.37934	2.26503	9.55711e-11	Up
Entpd8	0.0729838	0.524097	-2.37429	0.00992377	Down
Eogt	3.64151	9.98176	-0.978418	2.11561e-07	Down
Ep300	14.7923	12.2598	0.748694	0.00274401	Up
Epas1	200.289	597.426	-1.09231	6.12752e-06	Down
Epb41l4b	2.91962	8.31881	-1.01203	0.00818659	Down
Epb41l5	2.40209	6.45706	-0.944382	6.66773e-05	Down
Epdr1	1.51943	7.7892	-1.85422	1.16897e-06	Down
Epha1	2.56877	8.99909	-1.31835	1.81305e-08	Down
Epha4	0.96298	3.36589	-1.30936	0.00033023	Down
Ephb4	8.42753	42.9887	-1.885	7.0125e-11	Down
Ephx1	31.1505	128.966	-1.54523	2.26651e-05	Down
Ephx3	0.133962	0.527973	-1.48748	0.00283446	Down
Epm2a	0.360848	2.53732	-2.34687	3.51492e-07	Down
Epor	0.139934	1.5017	-2.94383	2.49962e-07	Down
Eppk1	0.871525	0.296778	2.03397	1.12772e-08	Up
Eprn	0.0516937	0.878976	-3.59723	2.5037e-06	Down
Epsti1	45.8652	11.0455	2.5957	8.24115e-06	Up
Erap1	22.7042	17.0968	0.889454	3.02453e-08	Up
Ereg	0.286416	0.0675967	2.56106	0.00096801	Up
Erfe	1.10404	0.0952116	3.99061	9.68011e-11	Up
Erg	9.28271	31.2995	-1.26965	2.11425e-09	Down
Erg28	5.79837	13.6274	-0.752312	0.00999399	Down
Erich3	3.9093	1.6243	1.77589	1.84166e-07	Up
Ermp1	3.28874	8.50957	-0.889122	2.25993e-06	Down
Errfi1	213.384	73.608	1.99417	8.91657e-07	Up
Esd	67.1187	39.5292	1.25331	1.56025e-09	Up
Esm1	2.48703	16.0129	-2.19409	2.95954e-14	Down
Esr2	0.0505464	1.1565	-4.02456	7.29791e-14	Down
Esyt1	44.5137	32.4359	0.947385	3.23606e-05	Up
Etf1	67.3047	43.6026	1.11472	4.93854e-09	Up
Etnk1	36.1354	21.0396	1.29021	0.0002531	Up
Etohd2	0.107879	0.525604	-1.79451	0.000786247	Down
Ets2	102.243	73.3068	0.964234	2.4634e-05	Up
Etv1	0.0599105	1.0371	-3.61506	2.63209e-14	Down
Etv3	22.1576	11.4455	1.45595	0.000212114	Up
Etv6	31.4809	9.54671	2.23912	2.22141e-05	Up
Eva1a	4.66605	2.79125	1.21989	1.54907e-06	Up
Eva1b	6.13728	19.2166	-1.19602	0.00395186	Down
Evc	0.258472	2.0327	-2.45842	1.03287e-07	Down
Evc2	0.864134	2.10627	-0.797603	0.000172721	Down
Evi2a	14.3471	6.24619	1.72916	0.000332011	Up
Evi5	1.516	3.80046	-0.849569	3.96189e-05	Down
Evpl	0.629549	2.01946	-1.21157	0.00570227	Down
Exd2	2.65779	6.67182	-0.84958	0.000562212	Down
Exoc1	4.25228	3.908	0.618047	0.0132915	Up
Exoc3l	0.83211	3.71878	-1.69508	6.43223e-07	Down
Exoc3l2	0.12119	0.849109	-2.35364	0.000115907	Down
Exoc3l4	2.67891	1.5596	1.2775	2.69739e-07	Up
Exosc3	18.6137	17.3375	0.589604	0.00463474	Up
Exosc7	2.43962	6.25417	-0.882751	0.00155349	Down
Exosc9	16.7799	15.7028	0.592099	0.0123568	Up
Exph5	1.03323	4.30118	-1.58158	1.69378e-08	Down
Ezr	163.518	117.381	0.978296	0.000242007	Up
F10	42.3409	3.16988	4.22696	7.99052e-50	Up
F11r	132.202	98.7297	0.921854	0.0008482	Up
F13a1	13.4078	5.67184	1.74846	0.00017799	Up
F2rl1	2.28657	6.77873	-1.07692	0.00280206	Down
F3	71.1845	37.5451	1.40838	2.51994e-08	Up
F630028O10Rik	42.4217	5.22665	3.44729	0.00119422	Up
F7	17.1623	8.22543	1.49312	0.0150037	Up
F730043M19Rik	2.23911	0.942378	1.73385	1.72081e-08	Up
F730311O21Rik	1.10553	0.208175	2.87012	2.5127e-07	Up
F830016B08Rik	12.9505	1.0476	4.16476	8.74389e-12	Up
F830208F22Rik	0.741687	0.0212569	5.60799	1.15298e-10	Up
Faah	2.62579	8.07002	-1.11567	0.000233136	Down
Faap20	3.84805	8.59627	-0.677589	0.0137541	Down
Faap24	3.47994	3.13824	0.640692	0.00647224	Up
Fabp4	43.3682	23.1228	1.42776	0.00115593	Up
Fabp7	0.685229	0.120397	3.03348	0.0105355	Up
Fads1	11.8084	43.6149	-1.3877	1.67777e-09	Down
Fads2	7.38621	21.2096	-1.02259	0.00150967	Down
Fads3	19.6035	45.9672	-0.757769	0.00159938	Down
Fads6	0.245442	0.786711	-1.19038	0.00357025	Down
Fahd1	1.48849	5.45145	-1.4031	0.000330862	Down
Fahd2a	1.92773	5.16652	-0.935326	0.00250391	Down
Faim2	0.302564	3.53772	-3.01811	1.18703e-06	Down
Fam102b	6.58191	13.9024	-0.588789	0.00439682	Down
Fam107a	22.7959	12.8296	1.28023	0.00359221	Up
Fam110a	3.09566	8.75561	-1.02554	0.000126378	Down
Fam114a1	5.90911	12.4181	-0.589293	0.0102308	Down
Fam117a	2.59375	6.22413	-0.786609	5.32996e-05	Down
Fam117b	9.69252	24.9796	-0.8949	0.00270821	Down
Fam120aos	6.45408	17.5136	-0.979021	0.00595421	Down
Fam120c	0.551901	1.90655	-1.31104	6.40242e-07	Down
Fam124a	1.38902	4.2473	-1.1252	0.00609369	Down
Fam124b	0.0895665	0.45288	-1.87314	0.0119558	Down
Fam133b	12.0686	9.99179	0.753467	9.298e-06	Up
Fam13a	6.50616	16.82	-0.885562	0.000745251	Down
Fam13c	0.388853	3.67926	-2.77626	9.07781e-07	Down
Fam149a	2.64812	5.81604	-0.642137	0.00152024	Down
Fam162a	19.6048	46.498	-0.767352	0.000190564	Down
Fam162b	5.19319	19.0593	-1.39674	2.81661e-05	Down
Fam167b	0.0895958	0.591681	-2.22651	0.0134418	Down
Fam169b	2.02938	1.25502	1.19248	0.00315695	Up
Fam171a1	4.7037	18.1985	-1.45522	3.34665e-09	Down
Fam171a2	0.0745476	3.18209	-4.98038	4.24281e-13	Down
Fam174b	14.4622	68.8155	-1.75645	4.73307e-08	Down
Fam178b	0.216639	1.02075	-1.75731	0.00012776	Down
Fam180a	0.232159	1.15603	-1.83629	7.16465e-05	Down
Fam181b	0.272042	1.86439	-2.29708	6.50968e-05	Down
Fam184a	1.05833	2.43379	-0.721115	0.00173141	Down
Fam189b	0.55429	2.78182	-1.84527	6.00146e-13	Down
Fam193b	3.81483	14.1864	-1.41847	1.59334e-06	Down
Fam20a	0.345641	3.0641	-2.63401	4.77039e-08	Down
Fam210b	4.01338	10.3151	-0.875987	0.00015112	Down
Fam214a	1.71446	6.64172	-1.47887	5.46465e-08	Down
Fam214b	12.0145	7.64031	1.10669	0.00844708	Up
Fam219b	2.5978	7.41897	-1.04433	0.000829652	Down
Fam221a	1.13583	2.8388	-0.834804	0.0064737	Down
Fam227b	0.123705	0	6.23398	0.00025633	Up
Fam234a	9.18148	22.129	-0.789197	0.000126037	Down
Fam234b	0.846957	2.5166	-1.08579	0.00033408	Down
Fam241a	33.5768	14.3628	1.70778	1.49432e-16	Up
Fam241b	0.825782	3.19975	-1.50243	0.000657881	Down
Fam3a	4.16166	11.5219	-0.987149	3.28264e-08	Down
Fam3b	1.91353	0.384229	2.78807	4.64001e-09	Up
Fam3c	8.81998	27.0124	-1.11995	1.62454e-06	Down
Fam43a	18.5866	14.073	0.885498	2.6843e-06	Up
Fam53b	5.60368	13.2681	-0.768997	0.000259958	Down
Fam53c	10.4998	8.3077	0.846286	0.0123991	Up
Fam78a	0.733	3.06779	-1.56014	4.78583e-06	Down
Fam78b	0.472468	1.18869	-0.860944	0.003044	Down
Fam83b	0.193942	0.744096	-1.46291	0.000275542	Down
Fam98c	5.13543	14.6464	-1.0408	0.000934494	Down
Fancb	0.320369	1.75825	-1.99485	5.09122e-05	Down
Fancc	0.774381	3.18843	-1.55064	1.98181e-12	Down
Fancm	0.291785	0.797967	-0.955762	0.000421182	Down
Fap	3.41407	0.311533	3.98126	9.23887e-14	Up
Farp2	0.854352	2.19488	-0.874815	0.000254785	Down
Farsa	15.7346	13.0527	0.759658	0.000551258	Up
Fas	68.8884	27.4618	1.79755	9.13635e-08	Up
Fastkd1	1.31096	2.86848	-0.651187	0.0071332	Down
Fat2	0.0309151	0.169186	-1.98104	0.000149204	Down
Fat3	0.126345	0.517664	-1.52352	0.00606242	Down
Faxc	0.0367403	0.216299	-2.0381	0.0013102	Down
Fbf1	2.29997	5.18342	-0.687063	0.000209733	Down
Fbl	31.7537	25.4522	0.817435	0.0033695	Up
Fbrs	11.639	10.3637	0.647241	0.00179436	Up
Fbxl16	0.177846	0.816986	-1.71473	0.00143274	Down
Fbxl21	0.174793	0.100436	1.28312	0.0129427	Up
Fbxl5	58.617	22.4161	1.8479	4.78732e-10	Up
Fbxo10	0.811702	2.45026	-1.11224	5.94285e-07	Down
Fbxo21	2.47302	7.88338	-1.19052	2.64036e-08	Down
Fbxo24	0.0391942	0.460678	-3.09697	0.00070257	Down
Fbxo33	4.22601	3.58892	0.713841	0.000214342	Up
Fbxo38	9.58224	6.98459	0.93978	7.89476e-10	Up
Fbxo39	0.48173	0.125115	2.48366	0.00590361	Up
Fbxo4	8.85353	6.53853	0.928854	0.000111034	Up
Fbxo6	23.3268	16.193	0.994128	0.000465305	Up
Fbxw10	0.550326	0.134891	2.57309	0.00103651	Up
Fbxw11	37.0849	23.3341	1.17014	0.00125904	Up
Fbxw17	6.83436	2.17766	2.15102	7.37796e-16	Up
Fcamr	0.844072	0.412075	1.5725	0.00494421	Up
Fcer1g	405.892	68.2221	3.06397	2.54986e-30	Up
Fcgr1	61.4785	5.19716	4.10519	2.90745e-10	Up
Fcgr2b	99.6671	19.2762	2.85983	6.6094e-44	Up
Fcgr3	74.526	14.2652	2.85546	2.09507e-23	Up
Fcgr4	244.055	9.74946	5.14509	1.39109e-28	Up
Fcgrt	13.8467	47.2032	-1.28347	1.24775e-10	Down
Fcmr	3.65486	11.33	-1.10998	0.0118862	Down
Fcnb	0.656248	0.0643895	3.8738	5.56828e-06	Up
Fcrlb	1.48907	0.164451	3.65995	1.62954e-26	Up
Fcrls	0.543757	2.5353	-1.71148	9.00546e-05	Down
Fem1c	13.3053	8.67946	1.11026	0.000218235	Up
Fen1	7.86691	4.91122	1.18894	0.000827045	Up
Fendrr	2.19417	21.6323	-2.81874	6.96149e-18	Down
Fermt3	23.2355	12.0395	1.43886	2.53055e-06	Up
Fes	29.3135	12.0449	1.75955	5.02753e-18	Up
Fez1	0.0660414	0.430476	-2.19396	0.00184478	Down
Fez2	15.9013	13.0885	0.77137	2.12936e-05	Up
Ffar2	2.19001	0.632621	2.26767	3.72171e-11	Up
Fga	4.2725	0.106219	5.86428	9.1249e-19	Up
Fgb	0.622705	0	8.33488	1.3703e-05	Up
Fgd1	0.565106	1.59625	-0.99939	0.000744622	Down
Fgd2	2.19802	5.66113	-0.884173	0.00517209	Down
Fgd3	4.50742	2.21909	1.51101	0.0047547	Up
Fgf1	3.62008	15.0425	-1.55362	0.000680637	Down
Fgf10	0.841143	3.47191	-1.53179	0.00119328	Down
Fgf11	0.309593	2.28935	-2.41403	1.38404e-15	Down
Fgf18	0.126778	3.86449	-4.44014	2.58727e-13	Down
Fgf23	0.600349	0	8.95958	3.69921e-12	Up
Fgf7	1.91428	8.5158	-1.63745	0.000902222	Down
Fgfbp3	0.684146	2.48712	-1.38353	8.88803e-05	Down
Fgfr1	14.7898	12.0908	0.774672	0.000434861	Up
Fgfr3	6.35145	41.4554	-2.25564	5.11997e-08	Down
Fgfr4	0.272858	6.65605	-4.12224	2.50813e-52	Down
Fgg	19.9402	0.79323	5.13548	1.56259e-38	Up
Fgl1	1.09127	0.391016	2.01321	0.00759954	Up
Fgl2	57.2778	19.3197	2.06163	7.00879e-23	Up
Fgr	46.9465	7.76942	3.08833	2.65303e-20	Up
Fhl1	39.7106	132.48	-1.23551	3.02894e-06	Down
Fhl3	3.35647	1.54712	1.60115	1.00791e-06	Up
Fhod1	5.68496	15.8378	-1.00992	0.00140634	Down
Fibin	2.15193	50.6083	-4.07318	2.58557e-32	Down
Fign	0.0788623	0.571657	-2.38122	1.88108e-11	Down
Filip1l	27.0063	19.1637	0.992103	0.000228362	Up
Firre	3.36487	9.73354	-1.04313	3.57202e-05	Down
Fkbp10	2.91369	10.1831	-1.3056	3.62456e-05	Down
Fkbp11	1.74546	6.25574	-1.34998	0.00245834	Down
Fkbp1a	249.504	199.783	0.795396	7.77242e-05	Up
Fkbp3	17.075	38.0017	-0.680846	0.00401741	Down
Fkbp4	39.0894	99.2031	-0.870612	2.06399e-05	Down
Fkbp5	99.8995	23.6006	2.53218	5.36488e-09	Up
Fkbp7	9.15032	32.2483	-1.33006	8.30333e-06	Down
Fkbpl	3.47834	3.13903	0.634307	0.00842181	Up
Fktn	1.65607	4.65491	-1.00646	1.11474e-06	Down
Flii	43.1695	37.326	0.695745	0.000454579	Up
Flnb	44.775	15.21	2.04959	1.24681e-07	Up
Flot1	59.7132	46.2044	0.842265	0.00179381	Up
Flot2	23.1273	17.754	0.855566	0.000108723	Up
Flrt1	0.003694	0.0452144	-3.0865	0.0100546	Down
Flrt3	2.20043	7.63779	-1.32171	1.4761e-07	Down
Flt3	0.390009	1.29993	-1.22271	0.00174516	Down
Flt3l	3.1109	10.932	-1.32162	7.46454e-07	Down
Flvcr2	0.894436	4.67949	-1.92664	1.21237e-08	Down
Fmnl1	46.158	15.7346	2.03852	2.21087e-05	Up
Fmnl2	71.5266	7.43967	3.74951	4.9895e-47	Up
Fmnl3	6.83314	19.5753	-1.05367	0.000240723	Down
Fmo1	21.4089	130.114	-2.11828	3.55367e-17	Down
Fmo2	98.861	293.238	-1.07195	2.7407e-07	Down
Fmo5	1.0708	4.48085	-1.57909	2.42391e-12	Down
Fmr1	19.4533	13.4504	1.01492	0.000103774	Up
Fn3k	0.0349445	0.316038	-2.67551	0.000760436	Down
Fn3krp	2.13898	5.21957	-0.788976	0.00450648	Down
Fnbp4	18.4393	9.62096	1.47879	0.0146981	Up
Fndc3a	19.1524	5.53511	2.28693	1.53521e-13	Up
Fndc3b	19.358	11.6584	1.21131	1.43882e-05	Up
Fndc3c1	0.100634	0.00307857	5.53331	7.94889e-05	Up
Fnip2	3.65654	1.61279	1.65094	9.50483e-11	Up
Fnta	20.1098	43.7176	-0.642002	0.000462526	Down
Focad	0.528639	1.25641	-0.763492	0.000279058	Down
Fos	46.2739	11.2511	2.51606	6.64996e-23	Up
Fosl1	5.38556	0.10779	6.12189	5.11174e-06	Up
Fosl2	50.3408	10.5602	2.73698	1.57832e-29	Up
Foxd4	0.227676	0.0641875	2.31387	0.0143398	Up
Foxf1	61.5145	153.06	-0.853102	0.00574108	Down
Foxf2	1.82281	14.1182	-2.45231	3.93637e-15	Down
Foxo4	5.52275	14.267	-0.888604	2.23444e-05	Down
Foxp2	0.436859	1.43369	-1.21556	0.00198883	Down
Foxred1	7.25831	5.59247	0.859572	1.34315e-07	Up
Fpr1	143.783	10.8649	4.16095	4.78567e-16	Up
Fpr2	194.213	10.6811	4.63379	4.65089e-32	Up
Fpr3	4.52171	0	10.6828	1.56252e-14	Up
Fra10ac1	2.23526	5.41847	-0.784004	0.00585106	Down
Frem1	0.54296	1.23523	-0.702213	0.000742736	Down
Frem2	0.0228945	0.0997401	-1.63635	0.000605136	Down
Frg2f1	0.391032	1.18866	-1.11681	0.00453699	Down
Frmd5	1.0771	0.164795	3.22695	9.50081e-11	Up
Frmd6	4.22089	17.9534	-1.60617	1.17848e-09	Down
Frmpd1	0.110653	0.525124	-1.75465	0.00126792	Down
Frs3	0.380513	1.54446	-1.5437	2.10981e-06	Down
Fry	1.88334	5.7695	-1.14898	0.000108818	Down
Fscn1	32.0747	9.26951	2.28734	3.15775e-24	Up
Fstl1	81.7064	41.3087	1.50512	0.000253615	Up
Fth1	6307.4	2147.67	2.04148	2.89936e-23	Up
Ftsj3	11.1122	9.92407	0.653354	0.00176597	Up
Ftx	0.269789	0.683179	-0.874208	0.0118947	Down
Furin	74.0168	25.7204	2.00078	6.71405e-16	Up
Fus	91.0475	58.7078	1.14221	0.000447965	Up
Fut10	0.390093	1.48041	-1.43574	1.2451e-07	Down
Fut11	3.60846	11.8822	-1.25241	5.56787e-05	Down
Fut4	6.29711	3.73304	1.2395	2.6522e-09	Up
Fuz	2.60695	6.52594	-0.839721	0.000699233	Down
Fv1	0.685985	2.225	-1.22402	0.0110099	Down
Fxyd1	2.82404	8.95606	-1.16073	0.000872686	Down
Fxyd5	108.837	70.5841	1.10042	0.000105526	Up
Fyb	23.363	7.54526	2.15889	1.25676e-05	Up
Fyb2	0.301267	0.0510869	3.0499	0.000173667	Up
Fzd2	0.555382	5.61425	-2.87471	5.21147e-09	Down
Fzd3	0.351882	1.27173	-1.3613	2.25757e-07	Down
Fzd6	4.60497	10.2032	-0.656712	0.00101306	Down
Fzd7	3.43519	12.2165	-1.34972	1.81327e-12	Down
Fzd9	0.152014	0.00397654	5.63201	0.00032169	Up
G3bp2	37.8903	28.4156	0.905849	1.6556e-07	Up
G530011O06Rik	1.76291	0.0627554	5.34475	5.41681e-11	Up
G630071F17Rik	0.0494702	0.00272154	4.58649	0.0110551	Up
G6pc3	6.24674	13.9881	-0.674198	0.00193615	Down
G6pdx	41.3584	20.2347	1.50674	8.70579e-07	Up
Gab2	17.1169	8.91042	1.42788	1.29604e-10	Up
Gabrb1	0.000591227	0.0170934	-4.28278	0.00983406	Down
Gadd45a	20.2809	13.659	1.0417	0.000141294	Up
Gadd45b	194.748	71.5003	1.91963	4.00819e-14	Up
Gadd45g	121.644	17.9039	3.23437	4.16348e-18	Up
Galc	1.8766	4.15353	-0.659295	0.000634404	Down
Galk1	7.92952	19.7132	-0.836058	0.000164068	Down
Galm	1.23261	3.12031	-0.836814	0.0124588	Down
Galnt1	39.2211	32.5319	0.745521	7.63003e-05	Up
Galnt10	1.76237	4.61584	-0.927931	0.0148293	Down
Galnt18	22.7618	54.3546	-0.780631	0.0135428	Down
Galr3	0.33142	0.0593515	2.90341	0.0146976	Up
Galt	4.34156	9.14451	-0.599509	0.00574238	Down
Gamt	0.610234	5.49089	-2.65583	1.31674e-05	Down
Gan	1.24341	0.793355	1.11204	0.00509275	Up
Gap43	1.80391	9.90027	-1.93352	0.00881553	Down
Gapdh	21.2605	13.3098	1.14722	5.51399e-05	Up
Gapt	1.95821	0.664864	2.0561	0.000230235	Up
Garnl3	2.50546	1.96205	0.839279	0.000406708	Up
Gars	50.8991	33.0295	1.11879	1.09643e-07	Up
Gas1	0.338976	7.8966	-4.04803	4.682e-39	Down
Gas2	0.239265	0.744904	-1.14724	4.54755e-05	Down
Gas6	50.8736	139.053	-0.956383	6.41047e-05	Down
Gas7	11.8052	3.51015	2.27274	5.80238e-08	Up
Gask1a	0.143155	1.69596	-3.08672	3.75102e-08	Down
Gask1b	0.900757	10.5424	-3.02815	1.72589e-07	Down
Gata3	0.647989	3.05627	-1.71896	0.00011773	Down
Gata6os	0.22059	1.22606	-1.99162	0.000959752	Down
Gatad2a	22.642	17.0932	0.885923	0.000141098	Up
Gatc	4.61539	11.69	-0.856737	0.000117211	Down
Gatd3a	11.2806	25.9778	-0.729785	0.00128463	Down
Gba	23.3835	18.9015	0.780353	0.00106454	Up
Gbp10	39.5587	1.10982	5.69506	4.83618e-06	Up
Gbp2	1431.09	49.4403	5.3832	3.05492e-32	Up
Gbp3	303.986	22.8388	4.27174	3.97085e-15	Up
Gbp4	163.357	10.7541	4.44207	5.99583e-25	Up
Gbp5	421.755	8.77821	6.12597	5.51271e-29	Up
Gbp6	128.106	5.56171	5.07444	3.94114e-14	Up
Gbp7	98.727	12.7998	3.44626	1.52725e-26	Up
Gbp8	13.5141	1.70977	3.48727	5.00569e-13	Up
Gbp9	133.961	20.3698	3.22435	2.72506e-28	Up
Gca	10.8073	3.95513	1.92029	9.22099e-16	Up
Gcat	1.11622	2.94548	-0.923222	0.00737557	Down
Gcdh	1.98724	5.13092	-0.885408	0.000231497	Down
Gch1	26.6293	7.64238	2.29686	4.06496e-21	Up
Gclc	152.172	61.5848	1.81291	6.44677e-05	Up
Gcnt2	39.8196	15.3142	1.88132	7.49932e-08	Up
Gda	62.3947	9.51498	3.19181	3.78799e-29	Up
Gdap10	2.3096	0.467225	2.79616	3.70119e-10	Up
Gdap2	7.80618	7.07223	0.619711	0.00187262	Up
Gdf10	0.320824	2.97949	-2.66533	0.00106858	Down
Gdf15	1.52455	0.28627	2.90274	2.4533e-10	Up
Gdpd2	6.35094	2.354	1.89645	9.58722e-05	Up
Gem	21	5.41597	2.46001	1.31366e-11	Up
Get1	2.23258	6.28338	-1.01798	0.00128999	Down
Gfi1b	0.656936	0.137936	2.81166	0.00902189	Up
Gfod1	1.4545	3.76249	-0.895169	0.0021785	Down
Gfpt2	11.4122	3.46819	2.23432	1.88483e-09	Up
Gfra2	1.55834	5.4963	-1.31749	9.18439e-05	Down
Gga2	2.26498	7.07327	-1.16675	1.40349e-05	Down
Ggact	2.79735	8.18965	-1.06449	0.000392644	Down
Ggct	14.4392	4.09598	2.31367	1.09791e-24	Up
Ggnbp1	0.275741	1.07256	-1.48215	0.0104142	Down
Ggnbp2os	1.23644	5.45398	-1.66793	0.000485595	Down
Ggt1	3.28591	0.781982	2.57842	5.58453e-06	Up
Ggt5	5.89073	2.5865	1.66182	9.39861e-06	Up
Ggta1	19.0296	17.4968	0.590177	0.0123112	Up
Ghdc	2.96502	6.5672	-0.667945	0.00098557	Down
Ghitm	86.2124	72.7391	0.727045	8.67716e-06	Up
Gimap1	8.60056	25.5544	-1.06943	0.000310805	Down
Gimap4	84.7163	64.2613	0.871173	0.0118195	Up
Gimap5	22.191	10.7556	1.53558	5.86826e-14	Up
Gimap6	128.9	89.595	1.00429	1.46496e-06	Up
Gimap9	21.2776	9.50106	1.65335	6.86737e-08	Up
Gins1	2.31481	1.26357	1.37913	0.000741625	Up
Gipc2	14.326	38.3002	-0.917976	0.00193939	Down
Git1	50.139	24.4096	1.51629	1.67939e-08	Up
Gja5	1.75537	14.5164	-2.54739	1.28582e-16	Down
Gjb2	3.64314	1.75654	1.57824	0.00247876	Up
Gjb4	0.201662	0.0599427	2.23494	0.000535248	Up
Gjc1	3.22256	8.10978	-0.851426	0.000102724	Down
Gjc2	0.0193622	0.662114	-4.60531	2.36741e-08	Down
Gjd3	0.0858612	0.00801313	3.89586	0.00773199	Up
Gk	16.4077	4.34918	2.40453	2.19362e-12	Up
Gk5	0.209855	0.637198	-1.11241	0.000257945	Down
Gkap1	4.07376	10.3793	-0.867023	4.68868e-06	Down
Gkn3	0.856434	3.26404	-1.4586	0.00196752	Down
Gla	7.54411	4.10287	1.35539	2.25718e-08	Up
Glb1l2	1.42108	8.39253	-2.06079	1.13918e-07	Down
Glb1l3	0.212202	0.946954	-1.67577	0.00189271	Down
Glce	2.43176	6.02835	-0.82412	2.0235e-05	Down
Gli2	0.00615529	0.25474	-4.85661	1.90323e-11	Down
Glipr2	120.09	14.9423	3.49471	2.40219e-42	Up
Glis2	1.00459	9.74859	-2.79442	8.9606e-47	Down
Glis3	1.05871	0.910117	0.719037	0.00996186	Up
Glo1	11.7131	31.8559	-0.955669	8.2938e-06	Down
Glp1r	0.274167	11.8039	-4.96279	5.57301e-33	Down
Glp2r	0.12015	0	7.65374	5.05438e-08	Up
Glrp1	0.217761	0.0513068	2.59377	0.0139451	Up
Glrx	80.9268	23.3935	2.27692	7.91754e-24	Up
Glrx5	17.0093	37.8998	-0.667315	0.007712	Down
Glt28d2	0.777865	2.89532	-1.42625	0.000136512	Down
Glt8d2	0.745717	3.49108	-1.69611	0.0048027	Down
Gltp	26.8213	72.7256	-0.960618	1.63149e-08	Down
Glul	329.672	240.198	0.942398	0.000157251	Up
Gm10037	0.0318366	0.205914	-2.21556	0.00313753	Down
Gm10130	1.7226	1.37067	0.813568	0.00396735	Up
Gm10406	0.08183	0.00336808	5.11232	0.000334338	Up
Gm10561	0.109701	0.698233	-2.18065	0.00110563	Down
Gm10602	0.0684501	0.785659	-3.01985	0.000478124	Down
Gm10654	0.22905	0.00958036	5.10894	0.00279117	Up
Gm10687	0.791571	3.39435	-1.64873	0.00189148	Down
Gm10791	0.957458	0.105696	3.69047	2.58808e-08	Up
Gm10824	0.0106687	0.260448	-4.1147	0.00224924	Down
Gm10851	5.28254	0.233319	4.96964	5.66685e-21	Up
Gm11266	0.0325803	1.45735	-4.99076	7.11012e-09	Down
Gm11423	0.423218	2.47082	-2.05168	8.26133e-05	Down
Gm11476	0.260907	0.146087	1.34057	0.00707475	Up
Gm11496	0.468667	0.072686	3.13223	0.00836074	Up
Gm11627	0.161474	3.06869	-3.80451	2.93405e-06	Down
Gm11690	0	0.204673	-7.53354	6.41408e-08	Down
Gm11714	0.475258	0.0182397	5.15516	0.00025311	Up
Gm11772	2.09308	0.56592	2.41034	8.57462e-06	Up
Gm11816	0.0310369	0.157511	-1.84924	0.00362375	Down
Gm11827	2.39792	0.436566	2.94342	7.39092e-08	Up
Gm11837	0.229323	1.34025	-2.09651	0.00580599	Down
Gm11963	1.3529	0.599081	1.64914	9.51147e-06	Up
Gm12031	0.0174158	0.288984	-3.56949	0.00158125	Down
Gm12107	0.137459	0	5.69648	0.00170353	Up
Gm12185	17.3853	1.71825	3.88222	2.1011e-09	Up
Gm12250	133.363	7.66148	4.68561	9.49747e-05	Up
Gm12258	0.477395	1.82711	-1.47792	0.0078543	Down
Gm12407	7.02706	0.557691	4.16809	3.48621e-15	Up
Gm12474	0.0677275	0.338531	-1.84442	7.14903e-05	Down
Gm12506	0.00728697	0.0767493	-2.90035	0.0134556	Down
Gm12589	0.603491	0.0535353	3.9685	0.000681081	Up
Gm12592	0.36686	0.187376	1.4631	0.0140406	Up
Gm12679	0.0388374	0	5.7531	0.00671628	Up
Gm12708	0.249043	0.0250519	3.75926	0.0149999	Up
Gm12764	1.72795	0.278425	3.13718	1.52131e-23	Up
Gm12854	11.248	8.00844	0.975929	1.05908e-07	Up
Gm12963	0.00955413	1.08753	-6.24346	1.85475e-05	Down
Gm13012	0.355643	0.194368	1.34964	0.00574818	Up
Gm13056	1.05985	6.94066	-2.19495	0.000321746	Down
Gm13293	1.40772	0.465111	2.05234	0.000366812	Up
Gm13375	0.460394	4.88013	-2.91257	4.20349e-16	Down
Gm13387	0.0800084	0.624259	-2.51288	6.14675e-05	Down
Gm13524	0.00249014	0.112292	-4.92225	0.00194268	Down
Gm13546	3.49191	0.823398	2.53943	7.4363e-07	Up
Gm13594	0.00798576	0.0797275	-2.84918	0.00555072	Down
Gm13648	0.489478	1.53316	-1.16839	0.0108671	Down
Gm13748	0.217426	0.0156494	4.22978	1.96717e-07	Up
Gm13749	0.00601342	0.279847	-4.94431	0.00200023	Down
Gm13816	0.257132	3.33588	-3.21883	9.28472e-14	Down
Gm13821	0.0465541	0	6.37516	0.000370737	Up
Gm13822	14.4026	0.622887	5.04751	2.76736e-12	Up
Gm13889	252.067	31.1916	3.48853	6.03736e-40	Up
Gm14010	1.68153	0.0324678	6.19089	7.46859e-10	Up
Gm14137	0.188096	0.00539443	5.66171	0.000635981	Up
Gm14199	0.24313	0.0113434	4.97214	1.5091e-06	Up
Gm14207	0.311213	2.67396	-2.62364	3.31439e-08	Down
Gm14221	0.15982	0.0263129	3.0596	0.0138624	Up
Gm14305	1.22852	4.06004	-1.2701	0.00707589	Down
Gm14322	0.102089	0.920772	-2.69157	1.24514e-09	Down
Gm14325	1.44283	5.4893	-1.4599	0.000289929	Down
Gm14326	0.445345	1.39947	-1.19211	0.00315592	Down
Gm14393	0.0242858	0.116952	-1.7854	0.0112478	Down
Gm14403	0.796764	5.58912	-2.33263	1.54152e-09	Down
Gm14410	0.306412	1.90399	-2.17594	4.45307e-07	Down
Gm14421	0.012823	0.163822	-3.17389	0.00712998	Down
Gm14548	7.03084	0.743825	3.70993	1.81409e-14	Up
Gm14569	0.0217223	0.126364	-2.08712	0.00467635	Down
Gm14636	0.0939349	0.0139019	3.24765	0.00466504	Up
Gm15050	0.170494	1.27759	-2.40048	0.00804047	Down
Gm15056	4.38287	0.010522	9.07986	6.9206e-12	Up
Gm15133	2.82037	0.624061	2.70839	0.000246787	Up
Gm15222	0.135817	0.789714	-2.07982	0.00143078	Down
Gm15418	0.218478	0.105316	1.5413	0.00614846	Up
Gm15423	0.0421234	0	6.576	4.5303e-05	Up
Gm15448	1.59167	0.387246	2.49267	0.000126305	Up
Gm15471	0.214363	0	5.38432	0.00856878	Up
Gm15506	0.0139057	0.079925	-2.05429	0.00239648	Down
Gm15518	0.024396	0.00183105	4.22164	0.00810919	Up
Gm15545	0.170103	0.929744	-1.97225	0.00637679	Down
Gm15551	0.0972432	1.14539	-3.08256	0.0110738	Down
Gm15663	0.16385	1.51493	-2.7314	5.66866e-10	Down
Gm15912	0.0854752	2.36508	-4.31025	2.82664e-08	Down
Gm15987	5.29119	1.54747	2.30443	1.07272e-05	Up
Gm15991	0.00723443	0.0660379	-2.70455	1.57678e-05	Down
Gm16008	0.200883	1.19833	-2.08644	9.10177e-06	Down
Gm16124	1.94114	5.17607	-0.929511	0.00290456	Down
Gm16141	0.00732594	0.0530348	-2.4224	0.00968257	Down
Gm16217	0.113067	0.013229	3.61038	1.48318e-05	Up
Gm16316	0.00335856	0.322098	-6.00829	2.91155e-05	Down
Gm16350	0.251177	0.0181909	4.3115	0.0011603	Up
Gm16553	0.0134143	0.185916	-3.33529	0.0057704	Down
Gm16619	0.463307	0.0343873	4.22476	0.00256986	Up
Gm16638	0.132709	0.503263	-1.44064	0.00945546	Down
Gm1667	0	0.295277	-5.96619	0.000177383	Down
Gm16675	2.6232	1.53899	1.25989	4.74661e-05	Up
Gm16685	8.35406	0.408228	4.90805	3.71043e-12	Up
Gm16701	0.0632921	0.52916	-2.6125	0.00943504	Down
Gm16740	0.945606	2.79632	-1.09529	0.00969243	Down
Gm16867	0.114719	0.0372385	2.10583	0.000212569	Up
Gm16894	0.158446	0	5.38136	0.00650975	Up
Gm17025	0.0101306	0.197605	-3.80347	0.00643721	Down
Gm17251	0.318726	0.84788	-0.928381	0.00429944	Down
Gm17455	1.11596	0.0894643	4.0672	0.00099534	Up
Gm17501	0.0938793	0.988914	-2.92057	2.90148e-08	Down
Gm19277	0.298508	0.0429776	3.28679	0.00135782	Up
Gm19412	3.55263	1.84046	1.47102	0.00490179	Up
Gm19426	0.0948133	0.381696	-1.53334	0.000986106	Down
Gm19461	0.046502	0.641895	-3.28153	2.83565e-06	Down
Gm19510	0.461287	0.00886994	6.14538	1.73359e-05	Up
Gm19522	0.157473	0.845303	-1.96306	0.00033604	Down
Gm19582	0.272272	0.0196278	4.27958	0.00282883	Up
Gm19605	0.207405	0.688845	-1.25541	0.0136557	Down
Gm19705	5.52932	1.70324	2.2197	7.6635e-06	Up
Gm19710	0.796116	0.091764	3.61713	0.000792628	Up
Gm19723	0.283559	0	5.48003	0.00456471	Up
Gm19744	0.0408358	0.00149138	5.18811	0.001827	Up
Gm19765	5.9943	1.0353	3.08945	0.000133402	Up
Gm19911	0.329758	0.00122656	8.47915	7.96667e-11	Up
Gm19951	12.9377	3.54322	2.36493	1.83103e-08	Up
Gm19990	1.70046	6.34016	-1.45738	0.00446564	Down
Gm20036	0.423488	0.242078	1.3065	0.0139896	Up
Gm20125	0.0594853	0.00246575	4.97874	0.0103982	Up
Gm20234	0.740603	0.167665	2.63498	0.000142756	Up
Gm20275	0.849166	0.23305	2.31153	0.00148364	Up
Gm20544	0.57885	2.30762	-1.50713	7.65363e-08	Down
Gm20554	0.173544	0.824046	-1.79409	0.00170208	Down
Gm20556	0.543195	0.0396044	4.22914	0.000425178	Up
Gm20559	39.4885	9.8489	2.49654	3.67731e-15	Up
Gm2065	0.103255	0.0303325	2.2877	0.00918973	Up
Gm2115	0.0574815	0.502884	-2.64744	0.00304735	Down
Gm21188	5.87231	1.21365	2.7905	1.41787e-07	Up
Gm2137	0.218389	1.50296	-2.30664	8.87283e-06	Down
Gm21859	0.27486	0.0318459	3.6164	0.00713369	Up
Gm2396	0.0452865	0.00167373	5.09652	0.00183294	Up
Gm24105	0.644643	0	7.8345	2.10144e-06	Up
Gm2427	1.10135	0.0665686	4.55208	5.48598e-10	Up
Gm26535	1.24223	0.0269945	5.9544	6.17153e-10	Up
Gm266	0.244705	0.0202699	4.0719	0.00140888	Up
Gm26637	0.759733	0.336988	1.69166	0.00118596	Up
Gm26641	0.221324	0.977139	-1.6564	0.0121946	Down
Gm26671	0.250515	1.1093	-1.67467	0.000284075	Down
Gm26705	0.0118205	0.405831	-4.60741	0.000604584	Down
Gm26782	0.370771	1.20848	-1.21974	3.81823e-05	Down
Gm26797	2.08541	1.06703	1.44785	0.00473202	Up
Gm26799	0.456953	0.118261	2.48357	0.000113508	Up
Gm26885	0.426468	0.117769	2.3221	0.000202934	Up
Gm27177	0.0424618	0.00844248	2.77332	0.00206271	Up
Gm27252	3.5419	1.37004	1.84513	3.08046e-06	Up
[truncated: 3,754 more rows]
