# Supplementary material for: Sinensetin, a polymethoxyflavone from citrus fruits, ameliorates LPS-induced acute lung injury by suppressing Txnip/NLRP3/Caspase-1/GSDMD signaling-mediated inflammatory responses and pyroptosis
Source: Royal Society of Chemistry journal article supplement (doi:10.1039/d4fo01704h), 2024-01-01
Supplement: d4fo01704h3.xlsx [file d4fo01704h3.xlsx]

## Sheet: Sheet1
Supplementary Table 2. Differential expression genes (DEGs) of SIN vs. LPS (n = 3).
Gene name	SIN (Mean)	LPS (Mean)	log2FoldChange	p-value	Regulation
1500026H17Rik	0.311948	0.0672482	2.02098	0.00109065	Up
1700113A16Rik	1.31841	0.429944	1.43938	0.00224886	Up
1810064F22Rik	0.852952	0.349473	1.10916	0.00300432	Up
2500004C02Rik	1.33966	0.540962	1.12096	0.000628607	Up
4632404H12Rik	1.03057	0.294486	1.63918	0.00068483	Up
4930438A08Rik	0.679017	1.45894	-1.27233	0.00285552	Down
4930523C07Rik	29.6685	42.1625	-0.700038	0.0034834	Down
4933412O06Rik	0.260271	1.35394	-2.5667	3.74395e-07	Down
5830444B04Rik	0.742178	0.232076	1.49948	0.0023844	Up
6530402F18Rik	2.74637	5.99342	-1.2981	2.63681e-06	Down
9030404E10Rik	0	0.212586	-6.02651	0.00279308	Down
9130015G15Rik	3.11734	0.792881	1.79959	2.69809e-10	Up
9330179D12Rik	0.17389	0.665844	-2.13547	0.00161998	Down
9930111J21Rik1	3.85141	9.81476	-1.52557	0.000803846	Down
A530032D15Rik	0.842805	1.93524	-1.3961	0.00104716	Down
A630012P03Rik	0.110295	1.19901	-3.6368	2.17706e-11	Down
A930015D03Rik	2.97948	5.69781	-1.11107	9.90322e-05	Down
AA467197	285.551	415.626	-0.723865	0.000581223	Down
AB124611	15.2463	22.6908	-0.747653	0.000843525	Down
AW112010	311.007	685.286	-1.31588	9.92469e-09	Down
Aamdc	13.1316	5.67371	1.0373	9.53077e-05	Up
Abcb1a	1.52037	3.81958	-1.52556	0.000121348	Down
Abhd14b	8.22633	4.01456	0.846691	0.000362253	Up
Abhd8	5.81112	3.04704	0.757902	0.00265261	Up
Abl2	3.33041	4.93053	-0.756841	0.000788871	Down
Abtb2	8.4714	18.5873	-1.32979	7.91643e-05	Down
Acaa2	51.3849	29.1779	0.633787	3.62049e-05	Up
Acat2	19.4625	10.9015	0.652506	5.40281e-06	Up
Acat3	1.68439	0.686761	1.10303	0.00107782	Up
Acod1	59.4498	178.718	-1.78472	2.00188e-07	Down
Acot13	26.3176	12.5724	0.886014	5.79212e-05	Up
Acot6	0.336264	0.0772902	1.94333	0.00295412	Up
Acss1	17.0056	9.0938	0.727847	0.000762273	Up
Acss3	1.7829	0.781789	1.01626	0.00133689	Up
Actg1	529.373	724.063	-0.632712	1.75974e-05	Down
Acyp1	2.39435	1.17098	0.852136	0.00142223	Up
Adamts3	0.61915	1.12625	-1.06181	0.00196924	Down
Adamts4	18.4007	37.1188	-1.20573	9.77768e-07	Down
Adamts8	8.66035	21.8711	-1.53933	1.758e-05	Down
Adamts9	11.0655	18.4895	-0.93444	0.000425583	Down
Adar	28.8575	43.9536	-0.79409	0.000411079	Down
Adgre4	2.14192	3.23518	-0.777227	0.000315638	Down
Adgrg7	0.0558974	0.315767	-2.68916	6.42879e-06	Down
Adi1	14.023	7.47819	0.725489	3.32123e-06	Up
Adm	14.7251	27.5354	-1.08801	1.99448e-05	Down
Adora2a	8.55042	15.0019	-1.00048	5.11996e-06	Down
Adora2b	13.0032	17.5236	-0.613443	9.27466e-05	Down
Adora3	0.345243	1.57636	-2.38998	5.28858e-06	Down
Aida	49.924	76.316	-0.801585	0.000480276	Down
Akap12	169.001	356.271	-1.27754	0.00201194	Down
Aktip	5.84227	3.09114	0.736752	9.00148e-05	Up
Alad	5.69881	3.01119	0.73927	9.12454e-06	Up
Aldh1b1	2.29909	6.83814	-1.79124	0.00289437	Down
Aldh6a1	25.5531	13.1375	0.782214	1.92015e-05	Up
Alpk1	3.73237	6.00551	-0.87423	0.000677784	Down
Amigo3	0.699253	1.87929	-1.63381	0.00273212	Down
Ampd3	20.5649	27.4229	-0.594917	0.000146702	Down
Amt	1.69459	0.710945	1.07701	0.00122522	Up
Amz1	2.29178	0.662442	1.62928	0.00133602	Up
Angpt1	6.32897	10.7167	-0.940028	5.2931e-06	Down
Ankfy1	18.3863	28.4674	-0.819739	0.000926837	Down
Ankrd22	2.43751	8.09906	-1.90777	1.88167e-11	Down
Anks1b	0.00441233	0.0267307	-2.78594	0.000864938	Down
Antxr2	11.9148	18.1744	-0.789805	1.36709e-06	Down
Anxa1	285.735	421.478	-0.746948	6.25818e-07	Down
Aoah	6.86763	10.5025	-0.786154	0.000752166	Down
Ap3b1	9.81625	13.5974	-0.657826	0.000626177	Down
Apaf1	8.25886	12.8964	-0.834345	0.000865054	Down
Aph1c	1.21283	0.569304	0.908211	0.000345193	Up
Aplnr	0.555944	2.23535	-2.21435	1.23696e-05	Down
Apobec1	9.30468	13.8897	-0.767059	7.77716e-05	Down
Apobec3	25.0202	33.2764	-0.596803	0.00348812	Down
Apol6	1.57624	4.18316	-1.61014	0.000118704	Down
Apol7a	0.697719	1.58493	-1.37492	2.98146e-05	Down
Apol9a	5.49691	16.5849	-1.79287	1.19309e-06	Down
Apol9b	11.6275	26.0747	-1.35485	1.37266e-06	Down
Apold1	10.2215	21.3388	-1.26042	0.000358919	Down
Apon	1.01902	1.68586	-0.908539	0.00190023	Down
Aprt	42.0528	23.1703	0.68096	0.00226457	Up
Arel1	11.6533	24.4517	-1.2652	2.21698e-05	Down
Arg2	36.0396	59.0095	-0.893353	6.61843e-11	Down
Arhgap30	19.8646	28.6349	-0.709017	4.35616e-06	Down
Arhgap8	5.86801	11.8463	-1.2088	1.99161e-05	Down
Arhgef19	2.45302	0.832207	1.39197	0.000301238	Up
Arhgef38	3.96072	1.90866	0.879885	0.00139344	Up
Arid5a	16.9676	28.1065	-0.925252	0.0023787	Down
Arl2	22.6036	12.821	0.637676	0.000150643	Up
Armcx6	0.304105	1.08437	-2.0448	0.000328434	Down
Arpc2	173.521	232.179	-0.60496	0.000940506	Down
Arsb	5.4749	8.29576	-0.790217	0.00106715	Down
Arsg	0.83317	1.28366	-0.796746	0.00325541	Down
Arsi	0.533238	2.07411	-2.17543	0.000423781	Down
Arsj	0.382894	1.65112	-2.32195	3.49615e-05	Down
Arvcf	1.24668	0.542563	1.01732	8.04708e-05	Up
Asap1	5.58401	7.56197	-0.622101	0.000324624	Down
Asap3	3.54212	7.9028	-1.35657	5.14341e-05	Down
Ascc3	10.7433	18.6718	-0.987878	0.000370688	Down
Asgr1	0.368447	0.0857954	1.93366	0.000133339	Up
Atp10a	5.82617	11.2872	-1.14177	5.16014e-08	Down
Atp2b4	4.37055	6.83225	-0.836541	0.000349232	Down
Atp8b4	3.26559	6.00615	-1.0542	7.91699e-07	Down
Axl	34.5559	54.0727	-0.830024	6.91985e-07	Down
Azgp1	3.9722	1.95042	0.847401	0.000862805	Up
Azi2	26.9983	36.736	-0.632687	0.00269953	Down
B3gnt2	31.759	41.8949	-0.585983	0.000233321	Down
Batf2	42.0133	65.7092	-0.838593	0.00240742	Down
Baz1a	8.38937	11.3285	-0.613612	0.000445151	Down
Bbs12	0.303802	0.114729	1.23043	0.00256994	Up
Bbx	3.66222	8.24291	-1.37538	0.000527971	Down
Bcat2	10.3642	5.17238	0.829996	0.00202787	Up
Bcl2a1a	27.3855	51.3008	-1.09874	0.000335471	Down
Bcl2a1b	83.0975	151.644	-1.06153	0.000185603	Down
Bcl2a1d	42.5297	79.3633	-1.09356	0.000190359	Down
Bcl7a	4.00326	1.6889	1.06721	2.04469e-07	Up
Bdnf	4.44597	1.33618	1.56039	9.98648e-09	Up
Bex2	13.4142	3.5414	1.73952	1.1549e-15	Up
Bex4	50.5581	21.6	1.04572	8.3373e-09	Up
Birc3	42.8652	75.1395	-1.00578	0.000584809	Down
Blm	0.411697	0.748663	-1.05175	0.00141954	Down
Bmp3	3.34399	1.3571	1.12416	6.46629e-06	Up
Bmyc	6.26506	2.77008	1.0008	0.000575645	Up
Bola1	12.3311	6.04287	0.854449	0.00167121	Up
Brca1	0.3386	0.57588	-0.952665	0.00129291	Down
Bub1b	2.6368	4.14603	-0.839398	0.000562682	Down
Cabp4	0.323658	1.05294	-1.89717	0.00255855	Down
Cachd1	2.61041	4.73622	-1.05526	0.000668251	Down
Calhm6	18.2112	57.7505	-1.87586	0.000168822	Down
Capza1	33.7251	48.6319	-0.704327	0.000362728	Down
Car13	18.8692	38.9969	-1.24262	4.67023e-05	Down
Card11	2.30886	3.75602	-0.879633	0.000322318	Down
Carhsp1	79.3762	116.216	-0.737809	4.44492e-05	Down
Cars2	3.9575	1.56913	1.15578	9.96675e-08	Up
Casp1	23.1401	39.1035	-0.935389	2.31956e-09	Down
Casp3	9.79524	15.6079	-0.862944	0.000133705	Down
Casp4	99.0584	180.227	-1.05157	7.89512e-08	Down
Casp8	22.9463	38.2662	-0.930623	0.000240679	Down
Cast	23.7185	31.8788	-0.613536	0.00152447	Down
Cbr1	27.4595	13.7653	0.808709	0.000716471	Up
Cbr2	2962.05	1669.03	0.641693	8.67698e-05	Up
Cbs	1.88106	0.674232	1.30389	3.32615e-05	Up
Cbx6	16.0852	8.35756	0.761667	2.51064e-07	Up
Cbx7	6.14318	3.09913	0.814039	0.0017212	Up
Cc2d2a	1.36584	0.767009	0.647136	0.00182213	Up
Ccdc122	2.45921	4.1496	-0.946321	0.000486775	Down
Ccdc8	0.845738	0.245409	1.60974	0.000518045	Up
Cckar	26.2138	13.0674	0.83171	0.000877429	Up
Ccl11	15.4011	37.0543	-1.4744	0.000538502	Down
Ccl17	84.432	39.8009	0.912276	0.000266887	Up
Ccl2	61.9685	193.256	-1.83853	3.58476e-09	Down
Ccl20	1.8756	11.9616	-2.90038	0.000132279	Down
Ccl3	66.9653	134.027	-1.19952	0.000537355	Down
Ccl4	49.5707	155.479	-1.86429	0.000320151	Down
Ccl5	494.177	822.035	-0.924977	0.000151453	Down
Ccl7	19.1026	40.3153	-1.26718	3.03377e-09	Down
Ccl8	5.80472	12.9051	-1.346	1.36838e-05	Down
Ccl9	25.3087	54.0482	-1.28497	2.65049e-05	Down
Ccn2	42.5375	85.9127	-1.20151	1.86367e-05	Down
Ccnd2	25.4834	42.6335	-0.939089	0.00112482	Down
Ccnjl	0.306133	0.885143	-1.72949	0.000204475	Down
Ccr1	48.5355	75.4848	-0.808527	0.000489302	Down
Ccr5	6.02691	9.80197	-0.887849	0.000867221	Down
Ccr7	23.9869	39.2187	-0.90311	0.000416219	Down
Ccrl2	46.2785	155.355	-1.95131	1.01821e-06	Down
Cd14	165.931	368.646	-1.34596	1.83505e-06	Down
Cd180	2.80376	4.07884	-0.727442	0.00241744	Down
Cd1d1	1.17806	1.7176	-0.726736	0.0011501	Down
Cd247	0.937911	1.98782	-1.27651	0.00311144	Down
Cd274	166.686	259.46	-0.824873	0.00106535	Down
Cd300e	1.80195	4.59637	-1.54393	1.18139e-05	Down
Cd300ld	3.75406	5.61939	-0.755623	0.00141988	Down
Cd33	10.8885	24.8067	-1.3536	7.94119e-05	Down
Cd37	8.38699	11.3833	-0.620214	0.00229149	Down
Cd40	62.0742	117.244	-1.11668	0.00198075	Down
Cd47	54.126	91.4492	-0.938365	1.19172e-08	Down
Cd52	236.914	333.663	-0.675846	0.000202034	Down
Cd53	89.7041	134.859	-0.765076	4.51731e-06	Down
Cd6	0.610486	1.70783	-1.6952	0.00168266	Down
Cd72	4.22937	12.3583	-1.758	0.000581555	Down
Cd74	673.362	1198.65	-1.02456	2.46462e-05	Down
Cd80	5.04223	8.43102	-0.93196	1.62623e-05	Down
Cd83	15.7301	31.0697	-1.18111	0.000110797	Down
Cd86	6.26119	17.5761	-1.70232	0.000397755	Down
Cd8b1	2.19374	8.3101	-2.14745	0.00312516	Down
Cdc42bpb	10.3203	14.64	-0.689952	0.00137303	Down
Cdh19	0.0229801	0.00308282	2.71382	0.00280374	Up
Cdk14	4.13412	7.26198	-0.997036	5.94548e-08	Down
Cdkl3	0.315547	0.546731	-0.981465	0.000124296	Down
Ceacam1	23.7767	38.8356	-0.88999	3.48384e-05	Down
Cenpx	8.95293	5.0793	0.640921	0.00167319	Up
Cep131	1.75725	0.95622	0.69597	0.00347345	Up
Cep192	1.7241	2.4102	-0.668491	0.00129954	Down
Cfb	185.117	285.977	-0.809115	2.5767e-07	Down
Cflar	44.6322	63.998	-0.704194	0.000917211	Down
Chchd10	49.2654	24.9163	0.796962	8.07392e-06	Up
Chd7	6.35382	10.4174	-0.905952	0.00197006	Down
Chst11	3.49841	4.98623	-0.699393	0.00256586	Down
Chst15	12.2199	19.4036	-0.852609	6.96272e-08	Down
Chst4	1.65292	0.356654	2.0338	3.2043e-05	Up
Chst8	0.0695865	0.340616	-2.50136	0.0015966	Down
Cisd1	36.6319	16.7272	0.952279	5.2913e-07	Up
Clec4e	25.0445	55.3771	-1.33027	7.39648e-10	Down
Clec5a	6.82788	12.0512	-0.998029	4.23119e-09	Down
Clec7a	6.43308	13.3787	-1.25985	0.00249878	Down
Clip2	4.4044	6.86545	-0.82048	4.39823e-07	Down
Clip3	0.817257	0.323246	1.15595	0.000942918	Up
Cln6	13.3727	7.01732	0.752575	6.89364e-05	Up
Clstn2	1.33696	2.00978	-0.77683	0.000995274	Down
Cmpk2	94.2839	293.528	-1.83523	3.46263e-07	Down
Cmtm8	14.5485	7.4944	0.780435	0.000107407	Up
Cmtr1	0.464179	1.04547	-1.35688	1.50552e-05	Down
Cnih1	39.029	22.0011	0.645331	3.92739e-05	Up
Cnksr1	6.58054	10.6008	-0.873663	2.6103e-05	Down
Cnp	23.4547	32.0946	-0.638915	0.000171539	Down
Cntrl	5.09026	8.18253	-0.874513	2.78189e-05	Down
Coch	0.475173	1.29224	-1.61845	1.61551e-05	Down
Col18a1	6.10382	9.95028	-0.901381	0.00247572	Down
Coq8a	1.90654	0.936991	0.83678	0.00103491	Up
Coro2a	7.06562	9.78975	-0.658728	0.000788923	Down
Cox4i2	42.9484	22.8331	0.73362	0.00225914	Up
Cpox	8.14427	3.86896	0.897585	2.81585e-05	Up
Creb5	0.431769	1.57204	-2.06933	6.72135e-07	Down
Crip2	153.621	83.7122	0.696523	0.000948014	Up
Crtam	0.388864	1.34491	-1.99476	0.000508694	Down
Crybg1	7.46405	16.3145	-1.31827	1.70427e-07	Down
Csf1	35.857	59.908	-0.934989	0.000820251	Down
Csf2rb	30.7558	45.3932	-0.734886	0.000926956	Down
Csf2rb2	5.67984	10.7064	-1.09487	5.76195e-11	Down
Csf3	12.7492	29.8258	-1.41711	1.07241e-07	Down
Csrp1	176.121	313.269	-1.02192	4.41517e-06	Down
Cst8	3.25285	1.32642	1.1138	0.000992111	Up
Ctdspl	10.8971	5.92532	0.699934	0.000227194	Up
Ctnnd2	0.272412	0.959925	-2.01538	7.36571e-08	Down
Ctsw	1.77483	4.78094	-1.63934	0.00288033	Down
Cutal	1.69601	0.492306	1.61015	1.91344e-06	Up
Cxcl1	52.1492	125.601	-1.47492	0.00109255	Down
Cxcl3	5.37727	15.5533	-1.7411	0.000928631	Down
Cxcl5	1.63948	5.33822	-1.92678	0.00244734	Down
Cxcl9	422.405	870.853	-1.21047	0.00305999	Down
Cyb5a	295.177	167.193	0.645817	0.00191482	Up
Cybb	39.3285	81.2149	-1.24509	0.000242363	Down
Cyfip2	2.4437	4.29063	-0.992889	2.93218e-05	Down
Cyp27a1	2.40804	5.03925	-1.25084	5.10127e-07	Down
Cyp39a1	12.2524	6.36098	0.76711	0.000160256	Up
Cyp4b1	348.813	186.421	0.724841	0.000149274	Up
Cyren	1.30432	0.545658	1.07972	0.00228002	Up
Cys1	5.56698	1.84022	1.39469	0.00190068	Up
Cysltr2	0.599075	1.96079	-1.90792	0.000500549	Down
Cyth1	15.1549	22.1604	-0.72865	5.03932e-08	Down
Cyth4	25.0097	36.0945	-0.716109	0.000172668	Down
D17H6S56E-5	145.387	216.102	-0.760589	8.48552e-05	Down
D2hgdh	1.30495	0.592976	0.963557	0.000332473	Up
D430020J02Rik	0.324675	0.752394	-1.39382	0.000691886	Down
D730003I15Rik	2.95928	1.11781	1.22376	0.00133988	Up
D830031N03Rik	0.670628	2.25524	-1.91729	0.000232448	Down
Dab2	12.8117	20.0397	-0.830584	4.45524e-05	Down
Daxx	60.3333	137.732	-1.39095	0.000192926	Down
Dbn1	38.8474	64.2203	-0.915138	1.27757e-05	Down
Dbnl	52.4329	71.2157	-0.625915	0.000577963	Down
Dclk2	0.404256	0.659784	-0.898043	0.00231445	Down
Dcp2	9.66488	18.2525	-1.11679	0.00153692	Down
Ddx4	0.0267901	0.101714	-2.10716	0.0023769	Down
Ddx58	48.5347	101.687	-1.26326	8.73982e-05	Down
Ddx60	9.21122	24.1741	-1.574	7.44865e-08	Down
Dennd1a	4.44656	6.90636	-0.825217	0.00036812	Down
Dennd4a	7.38633	16.1794	-1.32347	2.15257e-07	Down
Derl3	1.29756	0.360241	1.6556	0.00135518	Up
Dgat2	20.1268	35.728	-1.00283	1.02577e-06	Down
Dgcr6	9.65112	5.32721	0.678147	0.00250491	Up
Dhcr7	1.89323	1.05271	0.669918	0.00259158	Up
Dhx58	39.6266	101.233	-1.54999	1.42456e-06	Down
Dio2	2.60046	6.73502	-1.56995	7.03521e-08	Down
Dmac2l	2.2657	0.928409	1.10205	2.18277e-05	Up
Dmtn	0.570415	1.28403	-1.35179	8.57243e-05	Down
Dnaja4	23.1076	13.2024	0.624317	3.89374e-06	Up
Dnajc13	7.9028	13.458	-0.957159	4.68139e-05	Down
Dnase1l3	0.981464	3.50107	-2.03924	5.9403e-07	Down
Dnmt1	4.97318	7.05714	-0.686969	8.15265e-07	Down
Dock10	4.35931	9.01213	-1.23027	7.82176e-17	Down
Dock11	3.00612	4.22369	-0.667596	0.000953953	Down
Dock2	5.38598	11.8394	-1.32914	5.31976e-07	Down
Dock8	5.18669	7.39749	-0.700513	0.00205425	Down
Dpp4	5.95952	8.50066	-0.702236	0.000641706	Down
Dpysl2	9.36642	4.01961	1.03163	5.61124e-07	Up
Draxin	0.0986602	0.321525	-1.90068	9.45691e-05	Down
Dtx3l	40.31	74.0624	-1.06839	0.000276596	Down
Duoxa2	0.0578333	0.677672	-3.74449	3.57766e-07	Down
Dusp16	28.6202	46.8832	-0.905609	0.00148278	Down
Dusp5	11.8302	15.9352	-0.61305	0.000362312	Down
E130112N10Rik	0.0307045	0.224727	-3.0594	0.00320763	Down
Ebi3	32.7294	57.1959	-0.986873	7.72286e-08	Down
Ebpl	2.226	0.950497	1.04758	6.29274e-05	Up
Edn1	26.9926	44.1091	-0.898329	0.000257087	Down
Egln1	19.9498	11.2798	0.641319	1.82826e-05	Up
Ehd4	58.1979	97.179	-0.935198	0.000981698	Down
Eid1	21.108	11.2033	0.739631	0.00138271	Up
Eif2ak2	28.037	50.2554	-1.03675	0.00107212	Down
Elf5	6.2309	3.54944	0.634855	0.00326875	Up
Elmo1	4.01705	8.13229	-1.21902	0.00146261	Down
Endod1	10.0823	17.8048	-1.01672	0.000297788	Down
Enpp3	0.420807	1.01659	-1.46061	0.00035812	Down
Entpd1	31.8365	60.2933	-1.1097	1.45727e-07	Down
Eppk1	0.614623	0.871525	-0.692392	0.00330281	Down
Epsti1	26.1335	45.8652	-1.00173	0.000135825	Down
Esyt1	30.1663	44.5137	-0.747529	4.20035e-06	Down
Ets2	74.3039	102.243	-0.648718	0.000387661	Down
Etv1	0.209195	0.0599105	1.60548	0.00330857	Up
Etv6	12.5789	31.4809	-1.53748	0.00216902	Down
Evl	12.6106	17.142	-0.630756	0.00155685	Down
F830016B08Rik	7.67022	12.9505	-0.935488	0.000670634	Down
Faap20	7.26926	3.84805	0.739968	0.00316016	Up
Fads6	0.666964	0.245442	1.26886	0.000115759	Up
Fahd1	4.4514	1.48849	1.41296	0.000174349	Up
Fam120c	1.06955	0.551901	0.775852	0.00179728	Up
Fam169b	0.995792	2.02938	-1.1996	9.94252e-05	Down
Fam171b	0.0394542	0.143204	-2.04813	0.00159579	Down
Fam180a	1.42095	0.232159	2.43832	2.80808e-06	Up
Fam193b	7.04357	3.81483	0.710055	0.0016738	Up
Fam241a	24.8578	33.5768	-0.619652	0.00069622	Down
Fam3b	0.612361	1.91353	-1.82063	0.0001704	Down
Fam71f2	0.265474	0.854393	-1.88706	0.000319897	Down
Fam98c	10.7439	5.13543	0.892519	0.00299311	Up
Fat4	0.193847	0.680086	-2.03302	0.001172	Down
Fbxw17	3.41865	6.83436	-1.18474	9.08799e-08	Down
Fcer2a	0.806905	1.83246	-1.37657	4.47441e-05	Down
Fcgr1	38.6848	61.4785	-0.852328	5.16334e-08	Down
Fcho1	1.39116	2.29821	-0.903966	0.000319656	Down
Fem1c	8.26888	13.3053	-0.878654	0.000809699	Down
Fga	1.31	4.2725	-1.90649	9.19609e-07	Down
Fgfr4	0.985505	0.272858	1.6674	0.000125166	Up
Fgl2	40.8061	57.2778	-0.672918	0.000193657	Down
Fgr	32.8438	46.9465	-0.689421	0.000986441	Down
Fibin	4.80221	2.15193	0.965018	0.00142948	Up
Fign	0.331329	0.0788623	1.89161	4.17767e-05	Up
Filip1l	16.1801	27.0063	-0.930181	0.000130741	Down
Fkbp4	70.1665	39.0894	0.664824	4.01609e-05	Up
Flna	51.598	68.5508	-0.591283	4.90226e-05	Down
Flnb	24.1098	44.775	-1.0919	0.00271207	Down
Flt4	5.13281	8.40106	-0.88908	0.000626044	Down
Fmc1	21.4836	11.5519	0.719251	0.00243085	Up
Fn3k	0.361697	0.0349445	3.19511	4.26733e-06	Up
Fndc1	0.83442	1.70238	-1.22982	0.00288768	Down
Fndc3a	9.61968	19.1524	-1.18907	6.49226e-05	Down
Fosl1	2.75727	5.38556	-1.16085	0.000110841	Down
Fpr1	49.7287	143.783	-1.70194	2.14159e-11	Down
Fpr2	84.0981	194.213	-1.38063	2.04366e-10	Down
Fpr3	0.72147	4.52171	-2.79265	0.00194423	Down
Fra10ac1	3.88727	2.23526	0.616274	0.00295665	Up
Fras1	0.0382641	0.112015	-1.73474	0.00279799	Down
Frmd4b	6.78466	10.6304	-0.842464	0.0023632	Down
Frmd5	0.344919	1.0771	-1.82979	2.07975e-06	Down
Fstl1	41.7239	81.7064	-1.17494	0.00160137	Down
Furin	48.0875	74.0168	-0.806751	7.77176e-07	Down
Fzd1	6.19931	10.4438	-0.950447	0.00133936	Down
G6pc3	11.09	6.24674	0.640276	0.00225575	Up
Gab2	12.5906	17.1169	-0.628215	0.000333456	Down
Gabarapl1	120.597	69.6974	0.608301	7.90844e-05	Up
Gadd45gip1	11.0737	5.85723	0.743848	0.00261991	Up
Galnt13	0.593351	0.194541	1.44182	0.000918788	Up
Garnl3	1.55352	2.50546	-0.874494	2.9296e-05	Down
Gas1	1.59954	0.338976	2.0511	1.60705e-05	Up
Gas6	93.221	50.8736	0.68261	0.00231939	Up
Gas7	5.14525	11.8052	-1.38807	2.79697e-11	Down
Gatd3a	21.7737	11.2806	0.772962	0.000232939	Up
Gbgt1	0.392843	0.725095	-1.06661	0.00128069	Down
Gbp3	197.479	303.986	-0.811049	0.000238588	Down
Gbp6	76.9818	128.106	-0.923597	0.00118349	Down
Gbp8	8.42829	13.5141	-0.850626	0.00307541	Down
Gbp9	94.6146	133.961	-0.688859	0.00223003	Down
Gcat	2.44621	1.11622	0.946678	0.000117077	Up
Gcdh	3.95122	1.98724	0.810631	0.000127811	Up
Gch1	18.2909	26.6293	-0.734035	0.0011202	Down
Gclc	53.7395	152.172	-1.70945	7.12069e-05	Down
Gdf11	0.103269	0.348718	-1.95243	0.000221084	Down
Gdf15	0.704046	1.52455	-1.31199	0.00296001	Down
Gem	9.18377	21	-1.39344	5.0442e-05	Down
Gimap7	2.69431	4.76746	-0.997409	0.00047872	Down
Git1	35.3792	50.139	-0.690084	0.000693963	Down
Gjb6	5.44566	2.12383	1.19492	0.00126921	Up
Gk	8.90055	16.4077	-1.07697	0.000379799	Down
Glipr2	64.5691	120.09	-1.07075	4.57835e-08	Down
Glrx	56.3394	80.9268	-0.702296	6.03391e-05	Down
Gm10851	2.10869	5.28254	-1.49975	9.4576e-05	Down
Gm11423	1.50591	0.423218	1.63831	0.00319482	Up
Gm12250	67.8913	133.363	-1.1614	3.06778e-05	Down
Gm12764	0.703484	1.72795	-1.48261	3.40319e-09	Down
Gm14010	0.388817	1.68153	-2.28748	9.84526e-06	Down
Gm14137	0.00275133	0.188096	-6.23676	0.000565882	Down
Gm14403	2.04678	0.796764	1.18867	0.000697604	Up
Gm14636	0.00565169	0.0939349	-4.24522	0.00210769	Down
Gm16596	0.156323	0	5.50881	0.00218576	Up
Gm19277	0.0215321	0.298508	-3.98069	0.000583998	Down
Gm19705	2.52758	5.52932	-1.324	0.000994307	Down
Gm19911	0.0818274	0.329758	-2.20374	9.18576e-06	Down
Gm2808	0.0955615	0.263844	-1.66656	0.00174126	Down
Gm28347	3.94459	9.02023	-1.36939	0.000482011	Down
Gm30178	0	0.334949	-5.89758	0.00175034	Down
Gm30474	0.0567185	0.200181	-1.99502	0.000853372	Down
Gm31111	0.841919	2.1471	-1.54914	0.000379536	Down
Gm33887	0.208286	0.629463	-1.7545	0.00335839	Down
Gm34471	0.0150064	0.0926111	-2.79912	0.00170425	Down
Gm34934	0.366673	0.100953	1.67705	0.000768731	Up
Gm35874	0.00925376	0.335399	-5.27245	0.00124946	Down
Gm36723	0.0782823	0.177213	-1.37053	0.00160919	Down
Gm38500	2.69211	4.24064	-0.828927	0.00306389	Down
Gm38525	7.93078	16.394	-1.21281	0.00110777	Down
Gm38673	0	0.11842	-5.88212	0.00176555	Down
Gm39008	0.00314242	0.0470949	-4.12182	0.00275338	Down
Gm39061	0.730085	2.72957	-2.11921	0.000233109	Down
Gm39090	0.891087	1.67754	-1.10467	0.000299065	Down
Gm39701	2.95021	7.36342	-1.51653	1.81432e-06	Down
Gm40607	0.904957	0.0378292	4.40683	0.00181684	Up
Gm40892	0.279538	0.712851	-1.5405	3.91823e-05	Down
Gm41235	1.46545	2.32433	-0.852427	0.00130426	Down
Gm41374	0.0459483	0.493793	-3.63352	2.09576e-05	Down
Gm46736	0.198954	1.60301	-3.19529	1.12403e-12	Down
Gm51700	0.0133812	0.0770348	-2.72247	0.0030183	Down
Gm51801	0.0794235	0.199837	-1.5268	0.00306104	Down
Gm51956	0.253606	0.0108547	4.36347	0.000983052	Up
Gm5431	11.7387	29.3452	-1.51164	1.68437e-09	Down
Gm5930	0.160611	0.475198	-1.75796	0.00199824	Down
Gm614	0.902559	2.51333	-1.66653	7.11205e-05	Down
Gm6377	2.97995	6.6974	-1.35674	1.02894e-06	Down
Gm6625	0.392741	0.0169923	4.34877	0.00111588	Up
Gm7592	0.456062	2.14698	-2.40647	2.58451e-09	Down
Gm7609	0.241157	0.617887	-1.55114	0.00037649	Down
Gm7932	0.679713	0.216045	1.47338	0.00174786	Up
Gm8773	0.244142	1.40984	-2.69223	0.000518524	Down
Gnai1	9.28959	4.90695	0.744641	0.0011841	Up
Gnb4	7.30764	15.8888	-1.31355	7.43326e-07	Down
Gnmt	12.6035	3.79679	1.56336	7.11573e-06	Up
Gns	70.6313	95.7803	-0.623535	1.4279e-05	Down
Gpd1l	9.41474	5.08831	0.708588	3.38029e-05	Up
Gpd2	4.28049	7.16186	-0.932494	0.00011497	Down
Gphb5	0.00520202	0.156522	-4.98692	0.00344485	Down
Gpnmb	7.35559	13.1532	-1.038	0.000784672	Down
Gpr137c	0.868494	0.252297	1.60884	9.3875e-07	Up
Gpr15	0.630926	1.74593	-1.65443	3.24891e-07	Down
Gpr155	5.25249	2.37077	0.968295	5.72072e-06	Up
Gpr171	3.79241	8.28101	-1.32175	0.000113871	Down
Gpr18	4.3182	9.12786	-1.27805	0.00154807	Down
Gpr31b	0.707145	2.06972	-1.73923	0.000152488	Down
Gpr35	1.85125	2.43843	-0.585247	0.00242706	Down
Gpr37l1	0.0333255	0.180706	-2.61836	0.00302179	Down
Gprc5b	11.4145	15.9421	-0.670118	0.000733826	Down
Gprc6a	1.1282	0.427445	1.21832	0.0023108	Up
Gpt	15.8831	7.15664	0.961171	1.01298e-05	Up
Grap2	1.1054	2.17884	-1.172	0.000544904	Down
Grcc10	81.1129	47.1012	0.604931	0.000214887	Up
Grn	135.944	191.716	-0.682492	5.88404e-05	Down
Grrp1	13.0489	6.10081	0.920338	4.05018e-06	Up
Gsap	5.43368	8.10009	-0.764592	6.12641e-05	Down
Gsta3	138.697	77.8549	0.643692	0.00083933	Up
Gstk1	52.8198	29.8756	0.646987	0.00117147	Up
Gstt3	16.4934	8.502	0.780814	0.000887006	Up
Gtf2f1	28.5512	39.1148	-0.642155	0.000751993	Down
Gtpbp2	23.1773	30.8037	-0.594268	8.02836e-06	Down
Gucy1a1	12.0731	5.45423	0.967677	7.74664e-08	Up
Gucy1b1	20.5114	9.59931	0.917443	0.000122741	Up
Gzma	95.3792	167.841	-0.989959	0.000559851	Down
Gzmb	51.6741	234.897	-2.37649	2.27131e-10	Down
Gzmk	0.150686	2.01629	-3.97263	0.000653491	Down
H2-Aa	284.999	471.698	-0.917144	2.02979e-05	Down
H2-Ab1	234.098	361.177	-0.814623	8.14857e-05	Down
H2-D1	1860.84	2700.14	-0.715529	3.05095e-06	Down
H2-DMb1	30.1724	41.0249	-0.625405	0.00264953	Down
H2-K1	1042.12	1752.53	-0.929078	1.50804e-09	Down
H2-M3	17.5032	30.6963	-0.996151	1.27301e-08	Down
H2-Q4	491.136	804.609	-0.893967	4.19204e-08	Down
H2-Q6	3.94479	14.9525	-2.09527	1.78468e-11	Down
H2-Q7	9.33453	28.5737	-1.79165	1.26037e-18	Down
H2-Q9	6.00546	19.9337	-1.90388	1.1534e-12	Down
H2-T22	110.879	206.632	-1.07967	6.32349e-11	Down
H2aj	38.0812	19.9117	0.758681	8.49096e-05	Up
H2bc21	2.8292	1.35375	0.888741	0.00135767	Up
H3c14	0.5793	0.0386281	3.71921	0.00231054	Up
Hap1	12.9075	21.2377	-0.896132	0.000755939	Down
Has2	0.214365	0.869289	-2.2416	0.00232043	Down
Has3	0.14083	0.516272	-2.08312	0.000416696	Down
Hbegf	24.4131	44.8136	-1.07263	0.000363726	Down
Hcar2	15.4659	32.5218	-1.25376	1.95242e-13	Down
Hck	88.2299	139.714	-0.842922	2.58019e-06	Down
Hcls1	73.6646	121.66	-0.91055	2.8167e-05	Down
Hdac11	4.27765	2.31031	0.711716	0.00122547	Up
Hdc	103.464	195.336	-1.09913	2.30758e-08	Down
Heatr9	0.196684	0.800152	-2.19146	0.00106939	Down
Helz2	28.2239	57.2636	-1.20905	1.70032e-05	Down
Heph	1.09351	2.55034	-1.40008	1.07633e-07	Down
Herc3	0.847328	1.83517	-1.31297	0.000240255	Down
Herc6	59.7386	92.5721	-0.810461	0.000344275	Down
Hgf	4.98968	2.70112	0.698873	7.18758e-05	Up
Hgh1	3.06089	1.59224	0.762855	0.000758578	Up
Hif1a	73.3316	104.787	-0.70385	0.00124407	Down
Higd1b	8.70032	3.62267	1.09154	0.000778736	Up
Hivep3	0.468205	1.17587	-1.52686	0.000145219	Down
Hk1	19.2731	32.6842	-0.952569	3.89222e-05	Down
Hk2	8.37606	15.7401	-1.11294	0.00144527	Down
Hmcn1	0.266253	0.745123	-1.70291	0.00234982	Down
Hmga1	24.0676	41.3992	-0.966064	1.45817e-10	Down
Hmga1b	4.58188	7.75095	-0.93519	9.31028e-06	Down
Hmgcs2	5.40352	1.12862	2.06885	1.3199e-10	Up
Hoxb6	1.1058	0.38836	1.32997	0.00112064	Up
Hpgds	0.0332616	0.39538	-3.78314	1.54887e-06	Down
Hpse	3.17536	4.83169	-0.79408	0.00177634	Down
Hrh2	1.40214	3.30256	-1.41577	2.74294e-08	Down
Hs3st6	1.42888	0.50369	1.32357	0.000438985	Up
Hscb	7.90259	4.14665	0.751414	0.000903529	Up
Hsf4	2.01793	0.96166	0.890243	0.00188205	Up
Hsh2d	6.93493	13.2123	-1.11548	0.000302703	Down
Hsph1	14.7634	7.88348	0.723378	4.96192e-06	Up
Htr7	0.505553	1.61254	-1.87758	9.44848e-05	Down
I830077J02Rik	4.95018	11.6256	-1.4253	5.96541e-07	Down
Ifi202b	0.0234219	0.317999	-3.96728	0.00141461	Down
Ifi203	34.1951	72.6362	-1.28934	0.000609949	Down
Ifi204	204.944	389.927	-1.11064	4.31631e-08	Down
Ifi205	101.437	224.159	-1.33849	8.84541e-08	Down
Ifi206	30.8436	67.7475	-1.33116	4.66983e-05	Down
Ifi207	31.2703	59.1825	-1.105	1.24639e-08	Down
Ifi208	17.6965	50.508	-1.71829	0.00015077	Down
Ifi209	69.3466	148.351	-1.29096	3.72697e-06	Down
Ifi211	82.4704	187.379	-1.37334	2.60436e-10	Down
Ifi213	18.1805	28.7215	-0.850886	0.00031136	Down
Ifi214	1.7828	5.54433	-1.84763	0.00143198	Down
Ifi27l2a	200.753	414.462	-1.21634	6.73587e-05	Down
Ifi47	206.783	366.165	-1.01482	0.000105839	Down
Ifih1	39.9907	103.913	-1.57979	6.09685e-05	Down
Ifit1	363.772	736.111	-1.21195	0.000101736	Down
Ifit1bl1	18.1291	110.769	-2.80954	1.17876e-15	Down
Ifit2	239.37	828.479	-1.97861	2.42859e-18	Down
Ifit3	479.385	926.866	-1.14605	0.000103969	Down
Ifit3b	178.819	328.162	-1.06533	1.19985e-05	Down
Igfbp6	170.59	73.696	1.02899	6.0522e-10	Up
Igflr1	4.39903	1.70664	1.18417	2.71405e-06	Up
Igsf3	1.32961	1.94354	-0.738807	0.00162922	Down
Igsf6	27.6175	46.4913	-0.929093	9.34199e-08	Down
Igsf8	17.4486	24.4945	-0.678265	0.0006707	Down
Iigp1	355.788	493.589	-0.654424	3.4408e-05	Down
Ikzf1	14.2239	19.7072	-0.657652	0.00232839	Down
Ikzf3	0.732046	1.7268	-1.43329	0.00101329	Down
Il10	3.72418	8.94939	-1.42378	0.000808648	Down
Il11ra1	24.0442	13.0501	0.704707	4.73216e-05	Up
Il12a	0.546977	2.24622	-2.23837	4.37593e-07	Down
Il12b	0.304583	1.60108	-2.61752	0.000302702	Down
Il12rb1	0.896811	1.98478	-1.33374	3.70921e-06	Down
Il12rb2	0.701546	1.80419	-1.55049	2.43752e-07	Down
Il15	6.0083	16.5111	-1.65517	4.8526e-06	Down
Il15ra	6.02098	12.0035	-1.1883	1.86614e-05	Down
Il17d	1.30161	0.470769	1.28616	0.00277299	Up
Il17re	2.00876	1.07628	0.717946	0.00146343	Up
Il18rap	8.10942	12.3376	-0.788989	0.000662217	Down
Il19	0.076789	0.943138	-3.82566	6.32336e-06	Down
Il1a	4.45796	19.1587	-2.30589	4.22049e-07	Down
Il1rap	2.85999	4.45356	-0.821237	7.40307e-05	Down
Il1rl2	2.39138	4.42232	-1.07819	4.50395e-05	Down
Il1rn	179.568	353.042	-1.16621	1.22262e-05	Down
Il22	0.830316	3.22776	-2.15232	0.00012016	Down
Il27	2.92552	8.90469	-1.80257	8.30551e-08	Down
Il2ra	2.60114	7.41057	-1.72109	0.00027359	Down
Il2rb	10.0196	15.6896	-0.821981	0.000621055	Down
Il5ra	0.181136	0.531177	-1.7317	0.000287159	Down
Il6	14.3009	32.2292	-1.37859	0.00188531	Down
Inka2	2.82825	6.37135	-1.37349	9.96849e-05	Down
Inpp1	1.54376	3.46779	-1.3645	5.40882e-05	Down
Ipcef1	0.719768	1.27544	-1.0124	1.49021e-05	Down
Iqgap1	74.6778	102.237	-0.637659	0.000130229	Down
Irak2	27.8554	45.4191	-0.885126	8.98268e-08	Down
Irak3	20.3371	44.7236	-1.32251	2.83866e-09	Down
Irf5	12.5891	17.2587	-0.643244	0.000452567	Down
Irf7	644.665	1010.26	-0.821434	0.00156355	Down
Irgm1	192.631	318.572	-0.913945	1.56407e-05	Down
Irs1	0.549688	0.163609	1.56346	1.05419e-05	Up
Isg15	939.349	1404.01	-0.762273	0.000139171	Down
Isg20	77.2607	141.634	-1.05589	5.95553e-08	Down
Islr2	0.218203	1.02888	-2.46883	0.0019312	Down
Itga1	9.54039	13.8292	-0.711262	0.00219086	Down
Itga2b	9.73881	15.6633	-0.878086	0.00155721	Down
Itga5	22.2564	38.4592	-0.967181	2.27737e-07	Down
Itga6	13.2978	20.2218	-0.784129	0.000822837	Down
Itgax	5.92992	9.59937	-0.87511	2.22996e-08	Down
Itgb2l	2.30106	6.10263	-1.57307	5.03268e-06	Down
Itgb3	12.6588	20.6088	-0.885926	8.2732e-06	Down
Itk	1.90787	4.86027	-1.56003	0.00210248	Down
Itpkb	16.1374	36.3678	-1.37754	0.000593187	Down
Itpr1	7.35697	11.8144	-0.873513	0.000177334	Down
Itprid1	0.469228	0.0984512	2.06826	1.22368e-05	Up
Itprip	29.7362	53.0716	-1.01695	3.03156e-09	Down
Jak2	14.9758	28.0752	-1.10861	0.00201241	Down
Kcna3	0.700522	1.68322	-1.44622	1.88533e-05	Down
Kcnj12	0.143284	0.0245271	2.36129	1.0305e-05	Up
Kcnk12	1.11978	0.495442	1.00094	0.00229539	Up
Kcnk2	2.84655	1.39363	0.84898	7.73155e-06	Up
Kcnk3	2.28005	0.919263	1.13005	0.000434024	Up
Khk	8.49901	4.31637	0.796975	0.000339853	Up
Kifc2	0.806913	0.390193	0.866101	0.00263485	Up
Klf7	10.461	17.515	-0.931222	0.00195485	Down
Klhl3	0.253908	0.0856745	1.38996	0.00045775	Up
Klra2	14.0941	21.7673	-0.805478	1.326e-06	Down
Klrg1	0.778834	2.06857	-1.5768	0.00129947	Down
Klrg2	0.358844	0.853926	-1.4426	5.6764e-05	Down
Klrk1	3.07496	8.49631	-1.66212	5.71483e-05	Down
Krt222	0.0388971	0.208306	-2.63105	0.00133642	Down
Kynu	0.582598	1.25052	-1.27862	1.29367e-07	Down
L2hgdh	1.62044	0.752943	0.917807	0.00075858	Up
L3hypdh	0.334131	0.074087	1.99146	1.58e-05	Up
LOC115490137	1.47797	0.723055	0.848682	9.94979e-05	Up
LOC115490200	1.23164	0.595767	0.868344	0.0011509	Up
LOC118567333	0.0790189	0.356623	-2.39655	0.00092513	Down
LOC118567623	0.382837	0.865576	-1.34598	0.00253752	Down
LOC118567660	0.352383	0.0609811	2.35293	0.00138308	Up
LOC118567672	0.295213	1.3659	-2.42385	0.000417517	Down
LOC118567760	1.31995	3.18406	-1.45736	0.000457964	Down
LOC118567762	1.64903	4.45804	-1.61062	0.00212986	Down
LOC118568405	0.884148	3.01328	-1.94894	1.81964e-08	Down
LOC68395	2.99506	9.66161	-1.86188	3.56992e-11	Down
Lacc1	9.62792	24.0646	-1.52191	1.88156e-05	Down
Lag3	3.81843	8.43634	-1.33708	4.67239e-05	Down
Lbx1	1.66096	5.23069	-1.84479	3.10819e-05	Down
Lck	4.79286	10.3634	-1.30611	0.000173343	Down
Lcn2	4099.9	6002.91	-0.727027	6.27883e-06	Down
Lcp1	99.7643	174.722	-0.996843	3.68289e-06	Down
Lcp2	25.0392	39.0395	-0.822187	5.02809e-07	Down
Lgals3bp	255.655	416.596	-0.888105	1.77238e-09	Down
Lgals4	1.35741	0.49699	1.27305	0.000458485	Up
Lgals8	42.8448	73.3983	-0.97185	0.000355424	Down
Lgals9	319.218	597.464	-1.09164	9.3106e-10	Down
Lhfpl2	1.06756	1.61902	-0.784709	0.000250792	Down
Lhx2	0.0746107	1.70474	-4.71698	7.52235e-19	Down
Lilr4b	72.4743	127.152	-0.988005	4.28841e-09	Down
Lilrb4a	117.322	212.464	-1.02965	1.17665e-06	Down
Lin52	7.33494	4.31734	0.586587	0.00235268	Up
Lipg	56.8923	105.258	-1.07247	1.54655e-12	Down
Lmnb1	15.9734	26.7942	-0.940856	0.000766882	Down
Lmo2	16.9305	31.5613	-1.09501	0.000461684	Down
Lmod1	1.88368	0.744426	1.1517	8.69096e-05	Up
Lnpep	6.13705	11.1746	-1.04052	9.66347e-05	Down
Lonrf3	3.32874	1.74755	0.750291	0.000105478	Up
Loxl4	1.6741	2.34257	-0.665528	0.00129823	Down
Lpcat2	9.73621	17.777	-1.04378	3.67746e-07	Down
Lpxn	7.74967	13.8632	-1.02938	2.72497e-05	Down
Lrrc25	60.1384	83.0442	-0.642097	0.0032884	Down
Lrrc26	11.2045	3.5333	1.48495	2.00619e-07	Up
Lrrc55	0.00544093	0.146835	-4.97782	0.000537206	Down
Lrrc63	0.0944069	0.465857	-2.50698	5.04432e-05	Down
Lrrc8c	8.13009	14.134	-0.991441	0.000145821	Down
Lrrc8d	7.08493	10.5216	-0.761308	0.0014613	Down
Lrrd1	0.1614	0.0085472	4.06066	0.000393788	Up
Lrtm2	3.29361	0.69975	2.03903	4.12259e-08	Up
Lsp1	71.9551	101.23	-0.677051	0.00235618	Down
Ltf	39.9562	82.9773	-1.24404	0.000106024	Down
Ly6i	50.428	143.431	-1.68028	2.78211e-07	Down
Ly75	3.99065	6.83631	-0.961526	6.98159e-08	Down
Ly9	3.54967	6.88559	-1.15068	0.000824645	Down
Lyn	43.7454	66.5711	-0.798115	0.002324	Down
Lyve1	556.5	834.422	-0.762755	0.00183529	Down
Mab21l3	0.498683	2.39821	-2.4816	5.9788e-06	Down
Maged2	5.86377	8.54988	-0.735472	0.00247628	Down
Mageh1	7.77038	3.85008	0.830478	3.19376e-05	Up
Magix	1.31481	0.50366	1.21012	0.00111245	Up
Malt1	4.45206	17.0619	-2.15475	9.14965e-05	Down
Map3k8	35.0123	51.6909	-0.745514	0.00080683	Down
Map4k4	32.9681	53.3462	-0.88292	3.23288e-06	Down
Mapk6	18.0229	34.8437	-1.14968	0.00039765	Down
Marchf1	2.75522	5.32133	-1.1361	9.80588e-10	Down
Marcksl1	199.742	376.973	-1.11157	0.000300407	Down
Mast4	3.27008	6.8407	-1.26756	0.000653161	Down
Mat1a	8.55466	16.7986	-1.14682	2.79116e-06	Down
Mbl1	0.40952	0.617902	-0.775339	0.00231626	Down
Mbp	8.03984	11.4199	-0.692699	0.000446717	Down
Mccc2	7.11188	3.67377	0.775514	0.000130867	Up
Mcee	19.7096	11.3108	0.615679	0.000997539	Up
Mcm6	8.51663	11.7095	-0.648807	0.00261806	Down
Mefv	15.6363	29.3937	-1.08162	1.83897e-05	Down
Mettl21e	0.619169	0.111565	2.30013	1.91161e-06	Up
Mfap3l	2.77659	1.51073	0.693309	0.000212042	Up
Mgat3	2.10505	0.818135	1.17774	1.29291e-08	Up
Mid1	1.11228	2.50494	-1.36471	3.06627e-05	Down
Milr1	7.16247	15.0214	-1.25375	1.67179e-10	Down
Misp	8.2763	20.9628	-1.52496	1.69907e-07	Down
Mlh3	1.64121	0.814701	0.831332	9.1136e-05	Up
Mlkl	30.3084	60.3196	-1.18648	4.32773e-06	Down
Mmachc	2.52783	1.19882	0.89627	0.00132467	Up
Mmp13	1.27073	11.0739	-3.3472	0.000319283	Down
Mmp25	5.68018	10.0475	-1.00305	6.71596e-05	Down
Mn1	0.565062	0.235103	1.08354	0.000464112	Up
Mndal	33.8504	65.1723	-1.14639	0.00138214	Down
Mocos	4.54202	6.46759	-0.686462	0.000370893	Down
Morc3	21.1646	30.0332	-0.69079	1.50404e-05	Down
Mov10	10.125	18.6625	-1.07034	4.58828e-05	Down
Mpeg1	116.353	225.028	-1.13122	2.73522e-12	Down
Mpst	12.5945	7.17366	0.631837	0.000221497	Up
Mpv17l	1.59083	0.842802	0.734444	0.00337174	Up
Mpzl2	3.76656	1.9749	0.746938	0.000505858	Up
Mrgpra2a	0.770036	2.36731	-1.80093	2.40673e-07	Down
Mrgpra2b	4.54632	10.6816	-1.41342	2.05191e-09	Down
Mrpl28	22.5295	12.8324	0.632111	0.000302069	Up
Mrps25	2.67899	1.50575	0.649867	0.000128654	Up
Mrps26	21.0996	11.7145	0.673861	0.0023214	Up
Mrps28	20.4676	10.4549	0.78929	0.00015201	Up
Ms4a4b	18.2455	49.3785	-1.64959	0.00136986	Down
Ms4a6b	51.1467	72.9688	-0.690379	0.000343295	Down
Ms4a6c	64.8197	97.5681	-0.775349	0.000116479	Down
Ms4a7	1.07328	4.84405	-2.40131	0.000593014	Down
Mtmr14	14.6981	27.4569	-1.09933	0.00161282	Down
Mtmr7	0.325792	0.518149	-0.854808	0.00023451	Down
Muc4	4.42754	7.92466	-1.03628	0.00226783	Down
Mxd1	125.356	182.995	-0.719655	0.00343536	Down
Mycl	6.81715	2.5272	1.24967	1.41402e-09	Up
Myh9	102.723	163.603	-0.856782	0.001321	Down
N4bp1	10.8456	19.5322	-1.03763	8.56987e-06	Down
ND2	2554.48	1331.13	0.756317	0.000435698	Up
ND3	44.9291	19.8172	0.999373	1.59545e-06	Up
ND6	142.542	45.8005	1.46601	1.90074e-06	Up
Naa20	47.0968	67.1091	-0.702325	0.00199669	Down
Naa25	11.9081	17.9542	-0.780364	5.34181e-05	Down
Nadk2	5.36752	2.72928	0.799796	0.000795285	Up
Naip2	4.23334	8.98001	-1.25814	6.46555e-07	Down
Naip5	1.93344	2.70162	-0.660067	0.00341369	Down
Naip6	0.665557	1.23727	-1.06914	3.10932e-05	Down
Nampt	107.272	147.706	-0.651746	0.00209367	Down
Ncbp2	17.7289	8.74035	0.844475	0.000526548	Up
Ncoa7	3.34601	6.35667	-1.11481	3.43368e-07	Down
Ndst1	20.1006	28.7734	-0.705303	0.000264417	Down
Ndufaf4	5.17894	2.97527	0.618774	0.00201004	Up
Nfil3	9.9026	17.9223	-1.04966	1.58275e-05	Down
Nfkb2	10.2373	16.4837	-0.875518	4.03044e-05	Down
Nfkbib	25.1215	39.2714	-0.83103	1.55541e-06	Down
Nfkbid	5.5554	8.60828	-0.807692	0.000218467	Down
Nfkbie	14.3544	24.7168	-0.973179	8.34403e-05	Down
Nfkbiz	44.1017	75.919	-0.976365	0.000156437	Down
Ngp	355.843	701.493	-1.1466	5.33389e-05	Down
Nhsl2	1.05089	1.77174	-0.937858	0.000467793	Down
Nkain4	5.53135	2.33467	1.05896	1.31591e-06	Up
Nlgn3	0.062225	0.252329	-2.21726	0.00154429	Down
Nlrc4	0.746818	1.40164	-1.08275	4.21284e-05	Down
Nlrc5	29.396	46.9402	-0.859411	4.02549e-05	Down
Nlrp3	8.19437	13.1397	-0.861838	3.14201e-06	Down
Nme3	14.1937	6.41858	0.972811	0.00264089	Up
Nmi	60.7465	102.408	-0.942762	3.6637e-05	Down
Nnt	5.73309	2.9121	0.801462	0.00226603	Up
Nod2	5.61054	10.452	-1.08168	1.04892e-09	Down
Nop10	52.3672	30.4093	0.608539	0.00291698	Up
Nos2	13.842	46.5157	-1.93432	7.27135e-11	Down
Noxo1	1.80119	3.13635	-0.984198	0.00172574	Down
Nr1h5	0.0844209	0.322224	-2.11098	0.00147036	Down
Nr2f2	8.41697	4.10902	0.852878	0.000400789	Up
Nr3c1	15.6243	26.1747	-0.939038	0.000716598	Down
Nr4a3	1.56051	3.67621	-1.44312	0.000552943	Down
Nrp2	3.13174	6.20233	-1.18616	0.000926342	Down
Nsd3	9.55315	18.9392	-1.18792	0.000703966	Down
Nt5c	31.2202	17.2648	0.679088	0.003135	Up
Nt5c2	3.54612	4.844	-0.634713	0.00198717	Down
Nt5c3	40.6793	99.9933	-1.48716	4.61506e-12	Down
Ntng2	14.672	29.0273	-1.15533	0.00051256	Down
Nts	0.776413	4.45287	-2.74565	0.000272587	Down
Nup98	9.98961	16.4054	-0.909171	0.000439957	Down
Nxpe2	0.484101	0.177106	1.2735	0.00337021	Up
Oas1a	81.7549	143.957	-0.999078	2.08903e-06	Down
Oas1c	3.10152	6.19205	-1.19736	0.00187635	Down
Oas1g	23.3683	56.8998	-1.46003	1.35224e-07	Down
Oas2	31.1708	47.1998	-0.784733	6.1794e-05	Down
Oas3	38.2301	78.0243	-1.21109	1.48888e-06	Down
Oasl1	74.3901	203.538	-1.64999	2.67336e-06	Down
Oasl2	206.833	317.954	-0.80379	0.000495511	Down
Olfm1	12.6879	17.637	-0.654302	2.81709e-05	Down
Oplah	12.0308	6.2807	0.761527	0.000319316	Up
Optn	8.99102	15.4008	-0.964174	9.98827e-08	Down
Orai2	3.84018	5.31633	-0.648517	0.000241049	Down
Orm1	28.6747	62.3871	-1.29859	6.20729e-09	Down
Orm3	0.356608	1.29129	-2.03396	3.62079e-07	Down
Otud1	11.8014	5.32291	0.970914	6.9711e-05	Up
P2ry13	8.97029	18.5589	-1.21729	3.48257e-05	Down
P2ry14	5.70946	10.6163	-1.07637	2.2171e-11	Down
P2ry2	12.9752	25.4945	-1.16127	4.2781e-09	Down
Paqr7	8.19953	2.87889	1.34264	9.71358e-05	Up
Pard3b	0.775268	1.20401	-0.818446	0.00225453	Down
Parp10	47.0371	72.5613	-0.811342	0.000237288	Down
Parp12	86.5868	133.596	-0.808941	6.4632e-05	Down
Parp4	8.02455	11.9009	-0.75557	6.16712e-05	Down
Parp8	2.12295	4.09058	-1.14975	0.00182874	Down
Parp9	67.8987	128.978	-1.12362	0.000601956	Down
Pcdh18	2.05058	0.787942	1.19837	0.000351673	Up
Pcdhb7	0.605422	0.227546	1.2265	0.00159984	Up
Pcdhgb2	1.04161	2.06115	-1.17053	0.000310864	Down
Pdcd1	1.02311	3.11198	-1.82026	0.00103015	Down
Pde4b	6.76368	16.4004	-1.47473	1.17262e-06	Down
Pde7b	3.01936	6.46817	-1.30177	0.00023513	Down
Pdf	15.881	8.08178	0.800208	0.00160807	Up
Pdk2	9.52289	4.32121	0.960973	2.52071e-05	Up
Pdlim5	15.7635	20.8178	-0.589146	0.00184333	Down
Pdlim7	22.8756	37.2593	-0.897375	0.000534542	Down
Peak1	3.4485	4.71805	-0.635816	0.000657744	Down
Percc1	1.39714	0.442762	1.46187	0.000155142	Up
Pfkp	14.8908	23.4436	-0.843988	3.47288e-05	Down
Pgap4	4.83041	2.79414	0.612606	0.00203783	Up
Pgls	26.6518	14.1562	0.733894	3.19976e-05	Up
Pglyrp2	0.306	0.648582	-1.26549	0.000402532	Down
Pgm2	17.8869	24.8678	-0.660354	0.000195021	Down
Pgm2l1	2.11981	1.09828	0.75818	0.00190777	Up
Phf11a	12.3154	38.4689	-1.83678	1.49684e-12	Down
Phf11b	103.882	221.484	-1.28119	9.53563e-12	Down
Phf11d	87.5695	182.098	-1.2472	2.68478e-07	Down
Pik3ap1	27.8794	72.2063	-1.57054	2.08515e-06	Down
Pik3cd	12.0815	16.4721	-0.629792	0.000160163	Down
Pik3cg	2.04392	4.03252	-1.16706	8.24724e-08	Down
Pik3r5	17.3743	27.185	-0.835774	0.000887008	Down
Pira1	1.44309	3.98367	-1.6551	2.08897e-12	Down
Piwil4	3.13581	4.27283	-0.626193	0.000844528	Down
Pkdcc	2.73066	1.28835	0.900827	6.73225e-05	Up
Pla2g4c	0.124448	0.364532	-1.73888	0.000172357	Down
Plaat3	13.4789	21.5248	-0.856899	7.33345e-07	Down
Plac9a	333.333	163.892	0.850053	0.00171383	Up
Plagl2	12.3525	17.6471	-0.701471	0.000437029	Down
Plau	2.49731	5.38365	-1.30243	4.19573e-06	Down
Plbd1	13.2536	17.8443	-0.614027	0.00126387	Down
Plcl2	3.16489	5.13528	-0.887416	0.000280537	Down
Plek	54.3487	114.826	-1.27493	5.23239e-05	Down
Plekha4	12.4483	19.0028	-0.792517	0.000182244	Down
Plekhg1	0.971467	1.62408	-0.921948	0.000107648	Down
Plekho2	18.5391	32.8062	-1.00148	3.20412e-06	Down
Plod2	2.42214	3.90594	-0.882128	0.000748909	Down
Plpp5	11.8138	6.07962	0.772984	0.000993864	Up
Plscr1	41.0294	96.2392	-1.43159	0.000150387	Down
Plscr2	16.5616	41.8288	-1.52055	3.01394e-07	Down
Plxna4	2.2918	3.71103	-0.87826	0.00270663	Down
Pml	17.9545	32.0106	-1.02617	0.00031743	Down
Pmm1	14.1999	6.12778	1.04117	0.000287568	Up
Pnp	138.898	218.742	-0.846844	0.000184172	Down
Pnp2	2.70653	8.03829	-1.78136	0.000816768	Down
Pnpo	11.2513	6.28863	0.659236	0.000561232	Up
Pole	0.267658	0.549705	-1.22597	0.00196063	Down
Polr2f	55.9662	29.9868	0.715779	0.000631564	Up
Pop5	5.28385	2.8655	0.707257	0.00160574	Up
Ppa1	74.5171	120.24	-0.879492	4.25972e-05	Down
Ppdpf	24.4018	13.3015	0.696879	9.69929e-05	Up
Ppfibp2	2.59462	1.35954	0.75536	0.000406691	Up
Ppme1	17.8107	27.6529	-0.827102	0.00100399	Down
Ppp1r14c	3.05611	1.74182	0.627797	0.000338662	Up
Pradc1	5.32209	2.6392	0.837034	0.00092648	Up
Prag1	1.37947	2.83367	-1.23354	0.00054171	Down
Prcd	2.68185	1.12994	1.07772	0.00139337	Up
Prdm5	0.97707	0.463711	0.898932	0.00191687	Up
Prdm9	0.299433	0.7191	-1.453	0.000527913	Down
Prf1	12.203	22.3156	-1.03623	0.00151423	Down
Prkcb	1.05715	1.88608	-1.02671	0.000764252	Down
Prkcq	2.79328	6.31489	-1.3847	0.00258632	Down
Prkcz	2.20315	1.16197	0.744035	0.000196301	Up
Prodh	7.83579	4.01091	0.784474	2.82702e-05	Up
Prr15	2.73802	0.869702	1.47614	9.22461e-06	Up
Prxl2c	12.9322	7.29169	0.643417	5.97486e-06	Up
Psd4	4.80837	7.91154	-0.887992	0.00143798	Down
Pstpip1	12.3834	19.5217	-0.835673	1.5396e-06	Down
Pstpip2	12.6028	17.4729	-0.656545	0.00270424	Down
Ptch1	4.18424	2.43048	0.598866	0.00162594	Up
Pter	0.870272	0.365478	1.07117	0.00277867	Up
Ptges	16.979	29.9648	-1.01775	0.00101699	Down
Ptk2b	14.7851	25.7325	-0.990307	0.00018287	Down
Ptov1	7.95203	4.6603	0.587749	1.93856e-05	Up
Ptpn1	53.9838	81.6035	-0.784647	0.000353937	Down
Ptpn22	1.72698	3.48884	-1.21094	0.000790168	Down
Ptprc	38.4515	60.6165	-0.842639	3.20228e-05	Down
Ptpre	4.67876	6.84488	-0.72978	0.00107091	Down
Ptprj	6.96777	15.0175	-1.30762	0.000126835	Down
Ptrh1	3.04484	1.19688	1.16507	0.000733515	Up
Ptx3	8.33595	64.5329	-3.17333	5.3921e-08	Down
Pxk	26.5749	40.835	-0.813909	0.00229709	Down
Pxylp1	2.30483	0.90531	1.16149	2.46956e-06	Up
Pygo1	1.28724	0.566665	1.01103	0.00348653	Up
Rab17	0.901382	0.198061	2.01207	0.00323148	Up
Rab19	2.40725	3.94573	-0.897075	0.000392139	Down
Rab20	38.788	53.1695	-0.636737	0.000162748	Down
Rab22a	23.3126	30.8805	-0.594054	0.00123332	Down
Rab31	31.8167	43.7328	-0.641768	0.000180662	Down
Rab40b	1.05709	0.376446	1.30144	0.000743561	Up
Rab8b	19.4005	39.7095	-1.23499	0.000493675	Down
Rac2	74.1202	111.614	-0.762719	0.00080582	Down
Rac3	11.5911	6.67888	0.615379	0.000983845	Up
Rad1	2.11037	1.1579	0.687602	0.00201368	Up
Rad18	0.958242	2.18276	-1.38496	0.000634858	Down
Ramp1	4.22768	2.34693	0.668674	0.00267169	Up
Ramp3	7.73474	20.5308	-1.59159	9.05072e-05	Down
Rap2c	19.8275	29.9383	-0.77711	1.61885e-06	Down
Rapgef2	1.24652	2.79496	-1.36284	1.79489e-05	Down
Rarres1	0.0594179	0.412706	-2.97006	0.000739234	Down
Rasa4	8.67855	18.7894	-1.30536	6.75321e-08	Down
Rbl1	5.53082	9.78664	-1.01571	0.000400947	Down
Rbms2	21.4084	36.1594	-0.952146	0.00119315	Down
Rcan1	29.3516	42.862	-0.737413	0.00220286	Down
Rcor3	2.65636	1.45463	0.690939	0.0014239	Up
Rdm1	4.21042	2.05068	0.856662	8.64796e-06	Up
Reep6	12.0606	6.38921	0.731638	0.00049763	Up
Rel	4.47353	10.727	-1.47191	0.00112034	Down
Relb	10.186	15.5874	-0.803521	5.18637e-05	Down
Rfc3	4.19858	6.13888	-0.737753	0.00108277	Down
Rfc5	6.26643	9.08224	-0.725368	0.000810392	Down
Rfx8	0.174612	0.694522	-2.19488	0.000100945	Down
Rgs1	16.4747	29.756	-1.04214	7.98212e-07	Down
Rgs11	1.37696	0.605594	0.995792	0.00172087	Up
Rgs16	2.54033	6.02504	-1.45208	0.000427694	Down
Rhbdf2	27.018	35.6538	-0.584989	0.000208554	Down
Rhobtb3	0.721747	0.2873	1.14706	0.000287684	Up
Ripk1	5.41398	7.99973	-0.752753	0.000939933	Down
Rnasel	5.10193	9.46781	-1.08637	0.000202091	Down
Rnaset2a	23.1444	34.5573	-0.769462	0.00088771	Down
Rnf135	9.58041	14.1438	-0.750334	0.00095178	Down
Rnf139	11.3027	16.2549	-0.713104	0.000471275	Down
Rnf144a	7.13071	10.7529	-0.772636	0.000186126	Down
Rnf144b	9.01684	13.562	-0.77947	0.000678922	Down
Rnf149	16.1356	25.4268	-0.841254	0.000187352	Down
Rnf157	0.651533	1.32868	-1.21324	0.000807236	Down
Rnf180	0.587392	1.07444	-1.04576	0.00132761	Down
Rnf19a	23.1689	34.3691	-0.754311	5.32567e-05	Down
Rnf19b	69.9976	117.221	-0.932996	0.000150301	Down
Rnf208	1.04768	0.329986	1.49339	0.00287788	Up
Rnf213	53.1999	117.842	-1.33676	1.4569e-05	Down
Rnf217	3.40438	5.11751	-0.780116	0.00204817	Down
Rnf225	1.98532	5.43496	-1.63946	1.67852e-06	Down
Rnf24	2.04803	3.35256	-0.899656	0.0003537	Down
Ro60	6.032	3.10986	0.781571	0.00210038	Up
Robo2	0.242333	0.464543	-1.1375	0.00244593	Down
Robo4	41.7621	71.2017	-0.956343	8.40275e-06	Down
Rplp2	822.874	452.612	0.682673	0.000386207	Up
Rps19	575.87	333.818	0.608655	0.000493294	Up
Rps21	390.153	214.236	0.686823	0.000197731	Up
Rps28	489.986	262.67	0.721452	0.000568027	Up
Rrbp1	40.2024	59.7098	-0.764385	0.00142622	Down
Rsad2	259.541	1116.96	-2.31013	3.16641e-08	Down
Rtkn	3.57923	1.96248	0.687329	0.000410121	Up
Rtkn2	12.3563	5.28386	1.0404	4.18848e-06	Up
Rtl5	1.77911	2.41269	-0.626369	0.00198262	Down
Rtp4	92.1599	136.999	-0.758086	1.25373e-05	Down
Rundc3b	0.302909	0.713033	-1.43324	0.00049584	Down
Runx3	1.62161	2.44431	-0.78217	0.00204854	Down
Rybp	7.13876	10.6525	-0.75773	0.000225707	Down
S100g	77.5843	43.5851	0.653941	0.000570932	Up
Saa1	144.737	39.2758	1.69749	5.68485e-10	Up
Saa2	65.9275	18.2488	1.65842	1.41723e-07	Up
Sac3d1	4.6095	2.14745	0.925752	0.00138447	Up
Samd9l	70.5529	130.668	-1.06864	8.81012e-07	Down
Samhd1	227.865	345.699	-0.786161	5.36e-06	Down
Samsn1	52.6666	112.407	-1.27941	4.76522e-08	Down
Sash1	12.7632	20.8982	-0.907504	0.00156639	Down
Scg5	0.295737	0.0525968	2.3195	0.0016337	Up
Scgb1a1	65347.8	32652.3	0.820065	0.000137555	Up
Scimp	5.04767	11.3314	-1.35196	5.14572e-08	Down
Sco1	2.48182	4.95515	-1.19481	0.000581151	Down
Scube2	1.43041	4.14538	-1.74865	0.000992652	Down
Scyl2	9.70767	14.1739	-0.733041	1.37904e-05	Down
Sdc3	42.8045	63.1299	-0.738032	0.00113896	Down
Sdcbp2	2.31652	5.66516	-1.48951	1.71316e-05	Down
Sectm1a	0.570885	3.06586	-2.61286	2.65352e-11	Down
Selenoh	24.6484	13.0567	0.737483	0.00171932	Up
Sema4c	10.8216	28.9571	-1.62625	4.12199e-05	Down
Sema4d	10.9737	17.0014	-0.807142	0.000464423	Down
Septin9	16.0432	23.8381	-0.764091	0.00199152	Down
Serpina10	0.307642	1.2106	-2.17537	0.000214148	Down
Serpina3f	161.571	220.303	-0.63245	0.00100194	Down
Serpina3g	157.97	212.07	-0.612077	0.00125371	Down
Serpina3i	6.63384	8.99098	-0.625171	0.00186346	Down
Serpinb1c	0.0637115	0.330662	-2.54966	0.000818099	Down
Serpine1	193.475	357.948	-1.08684	0.00194728	Down
Sfta2	127.488	74.3866	0.599994	0.00192612	Up
Sgms2	3.80408	5.09315	-0.599189	0.000535823	Down
Sh2d2a	1.07949	2.08027	-1.1297	0.000847774	Down
Sh2d5	0.70582	1.40271	-1.17473	0.000503439	Down
Sh3gl3	0.215805	0.435477	-1.19481	0.00193203	Down
Sh3pxd2b	10.3482	23.5321	-1.38223	2.19809e-06	Down
Shisa5	192.753	270.309	-0.670668	1.95088e-07	Down
Shisal1	0.260568	0.0809793	1.51378	0.00100449	Up
Sidt1	0.891898	2.68649	-1.79313	5.377e-06	Down
Siglec1	4.08011	12.2763	-1.75164	0.000214756	Down
Sik3	6.48363	12.377	-1.12722	4.00251e-05	Down
Sipa1l1	4.05182	11.9587	-1.76647	4.62265e-05	Down
Sirpb1a	4.35897	9.26882	-1.2657	1.47365e-07	Down
Siva1	23.6378	11.3162	0.892451	0.00288182	Up
Sla	21.1885	32.8334	-0.806801	2.66373e-05	Down
Slamf1	1.09597	3.87487	-2.03365	0.000156726	Down
Slamf7	3.08345	10.1063	-1.91345	4.68689e-07	Down
Slamf9	8.38596	15.3899	-1.0591	1.33233e-09	Down
Slc15a3	74.7582	172.801	-1.40025	4.84758e-07	Down
Slc16a11	16.837	9.05348	0.712763	0.00126381	Up
Slc16a12	1.76479	0.607635	1.35365	7.08338e-09	Up
Slc16a7	3.78318	1.67076	1.00445	6.95628e-05	Up
Slc1a1	3.95252	6.5641	-0.927978	0.00222617	Down
Slc25a15	2.35352	1.29075	0.68355	0.000437996	Up
Slc26a11	1.36221	0.520786	1.21433	0.000860626	Up
Slc26a4	1.27471	10.4945	-3.27158	0.000936022	Down
Slc26a9	3.64276	6.26447	-0.97566	0.00162998	Down
Slc28a2	11.3497	22.754	-1.18069	5.86192e-13	Down
Slc2a6	15.122	25.8098	-0.948332	5.72365e-06	Down
Slc35a1	3.78675	2.19336	0.6093	0.00171483	Up
Slc35e3	5.33413	2.8941	0.701579	1.59246e-05	Up
Slc36a2	4.50718	7.94052	-1.00083	7.47384e-05	Down
Slc39a2	1.04735	3.16707	-1.75803	0.000377398	Down
Slc43a1	0.781944	0.308676	1.15305	0.000509517	Up
Slc4a5	2.31766	3.11606	-0.614454	0.00246535	Down
Slc5a1	3.27174	5.9085	-1.05007	0.00103236	Down
Slc6a15	0.575262	0.178127	1.52284	0.00292211	Up
Slc6a19	0.0226214	0.147163	-2.88456	0.00129504	Down
Slc6a20a	0.685071	2.04538	-1.76553	9.74744e-06	Down
Slc6a4	1.89521	3.14917	-0.921689	0.000164457	Down
Slc6a6	15.2715	24.2539	-0.861671	0.00123631	Down
Slc7a2	8.76177	12.8415	-0.736347	1.47927e-06	Down
Slc7a4	1.78554	0.756886	1.05598	5.28248e-05	Up
Slc9a1	7.708	11.3842	-0.749306	5.95062e-05	Down
Slco1a5	2.19813	4.54399	-1.24287	0.000111873	Down
Slfn1	52.6216	100.899	-1.12609	4.90588e-08	Down
Slfn2	326.907	497.089	-0.789069	1.54984e-05	Down
Slfn3	12.0143	22.8087	-1.10354	0.00068203	Down
Slfn5	83.2922	171.673	-1.24649	0.00171926	Down
Slfn8	23.7334	53.3919	-1.36342	1.30795e-06	Down
Slfn9	3.34603	10.4947	-1.84906	3.8856e-06	Down
Smchd1	9.13539	14.2932	-0.837966	0.00100331	Down
Smco3	0	0.107475	-5.75676	0.00225152	Down
Smco4	8.34992	4.11214	0.840626	1.32892e-06	Up
Smcr8	6.64492	8.81634	-0.592779	0.000571626	Down
Smim1	10.6795	5.0507	0.907732	0.00172527	Up
Smim10l1	28.0277	15.2259	0.702085	0.000408256	Up
Smim6	22.609	11.089	0.855952	0.00148071	Up
Smox	15.4802	22.4424	-0.710355	0.00110926	Down
Smpdl3b	9.43422	19.3372	-1.20603	2.57995e-05	Down
Smtnl2	5.64525	2.21759	1.17199	3.79402e-05	Up
Snap47	5.15787	2.9947	0.603038	0.000368298	Up
Snhg11	1.19013	0.632107	0.727023	0.00251795	Up
Snhg18	5.12347	2.62535	0.787261	0.00161097	Up
Snhg7	3.51723	1.53024	1.01933	0.000991402	Up
Snrnp200	15.1288	20.3282	-0.60839	0.00166356	Down
Snta1	5.10302	2.61742	0.782825	0.000674213	Up
Sntb2	5.79578	11.0221	-1.12354	0.000422409	Down
Sntn	19.4033	9.98873	0.778076	0.00202218	Up
Snupn	2.49833	1.38443	0.669928	0.000927918	Up
Snx15	6.41267	3.30718	0.780372	0.0020166	Up
Snx22	3.60696	1.21217	1.40176	0.000259045	Up
Soat2	2.12795	3.87069	-1.05156	0.00233288	Down
Sp100	67.4271	106.494	-0.847871	0.000620607	Down
Sp110	24.5655	59.9835	-1.48866	8.1534e-05	Down
Sp140	19.5828	51.5507	-1.59021	5.32594e-08	Down
Sp2	6.73083	9.88939	-0.74728	0.00235092	Down
Spata13	6.65105	12.2939	-1.0749	0.0011821	Down
Spats2l	3.81048	9.55969	-1.52564	1.20083e-05	Down
Spef1	13.254	6.54559	0.827227	0.00106544	Up
Spic	5.87072	16.3213	-1.67453	8.03645e-05	Down
Sppl2a	68.6684	98.4349	-0.701351	6.91055e-06	Down
Spr	22.8658	11.4997	0.815784	7.31206e-05	Up
Spry1	38.943	17.4856	0.98024	2.89796e-05	Up
Spry4	9.21419	14.234	-0.811434	0.00243088	Down
Sptbn5	0.035367	0.0889462	-1.51581	0.000361016	Down
Srgn	262.155	378.627	-0.708138	3.01761e-06	Down
Srp54b	0.244137	2.03324	-3.22317	1.97906e-05	Down
Ss18l2	20.7328	9.64834	0.927918	0.00132444	Up
St3gal1	61.0605	97.3459	-0.862795	0.000584326	Down
St6galnac4	7.06995	9.68399	-0.639209	0.000259219	Down
Stap1	1.31638	2.99387	-1.37544	1.80566e-05	Down
Stard4	4.95783	2.89361	0.600145	0.0014385	Up
Stat2	58.9085	85.5597	-0.71907	0.000561658	Down
Stat4	1.68919	3.97761	-1.42439	1.67452e-08	Down
Stbd1	10.7785	5.97489	0.675709	0.00289966	Up
Stc1	0.380042	2.32207	-2.83467	1.12325e-05	Down
Stk24	10.7106	15.1544	-0.689732	0.000581331	Down
Stk33	5.68232	3.20995	0.636992	0.00337957	Up
Stk39	3.41337	6.62618	-1.15667	0.000997379	Down
Ston2	1.2698	2.49527	-1.17769	0.00209024	Down
Stox2	0.10302	0.0494524	0.87073	0.000295051	Up
Stx11	17.674	30.3517	-0.976312	0.00187487	Down
Stxbp3	36.5518	53.7005	-0.73801	1.78906e-08	Down
Syde2	2.81016	1.34142	0.897116	0.00215053	Up
Syk	9.05618	14.7764	-0.886332	2.09231e-05	Down
Synpo	11.1308	17.4393	-0.836971	1.56362e-05	Down
Syt12	2.71879	4.09007	-0.770266	0.00069793	Down
Tacstd2	36.7225	68.8541	-1.09775	6.09685e-05	Down
Tagap	7.00719	14.4749	-1.2369	2.01074e-05	Down
Tango6	1.76361	2.83551	-0.868391	0.000375478	Down
Tank	11.5595	15.8418	-0.64301	0.00138024	Down
Tap1	151.6	219.716	-0.722368	0.000509437	Down
Tapbpl	40.6828	63.4975	-0.827732	5.07821e-06	Down
Tarm1	14.4531	37.7156	-1.58419	3.15291e-05	Down
Tasl	3.77999	5.89855	-0.823183	0.000114943	Down
Tbc1d1	6.38889	12.597	-1.18531	0.00221225	Down
Tbrg1	70.3955	127.109	-1.04661	0.000122202	Down
Tbx1	4.14076	2.05044	0.832086	0.00227577	Up
Tcirg1	28.0477	38.1233	-0.625868	1.67557e-06	Down
Tctex1d1	0.00334593	0.101375	-5.01298	0.00199184	Down
Tdo2	0.332512	0.0464456	2.65892	0.00219423	Up
Tdrd7	12.6113	19.432	-0.810785	0.00029089	Down
Tenm4	0.0102846	0.0564362	-2.66501	0.000193326	Down
Tent4a	8.42552	14.8017	-1.01189	0.0023021	Down
Tent5a	8.01019	13.7556	-0.9793	0.00182299	Down
Tes	18.699	31.1398	-0.925038	4.87487e-05	Down
Tet2	2.86563	6.94453	-1.48287	0.000379959	Down
Tgm2	556.717	885.135	-0.846335	0.000111048	Down
Tgtp1	86.1631	165.985	-1.12447	5.0977e-07	Down
Tgtp2	90.321	127.087	-0.674354	0.000406355	Down
Thbs1	43.2605	125.019	-1.71968	1.98671e-22	Down
Them4	3.4006	5.74346	-0.930199	0.00143057	Down
Them6	7.77099	3.97425	0.790095	0.0030505	Up
Themis2	36.9337	66.0715	-1.02149	2.10419e-06	Down
Thy1	4.10251	10.1645	-1.50802	0.000296499	Down
Timd4	2.30662	4.23005	-1.06028	0.00182934	Down
Timeless	6.91668	12.7157	-1.06574	3.06939e-08	Down
Timp4	0.839904	0.276965	1.40947	0.00254643	Up
Tiparp	33.2486	60.154	-1.04743	3.23202e-06	Down
Tle3	18.2754	33.1878	-1.06107	0.0026806	Down
Tlk2	5.7472	10.0938	-1.01389	0.00286227	Down
Tln1	43.6286	62.1059	-0.687404	0.00213289	Down
Tlr2	34.7085	86.6778	-1.51425	1.91356e-06	Down
Tlr3	12.3855	29.325	-1.43773	2.53549e-07	Down
Tlr7	6.37721	11.6616	-1.04967	8.30157e-11	Down
Tlr8	2.85045	4.18897	-0.730984	0.00272348	Down
Tlr9	2.27359	5.02691	-1.32092	0.000103776	Down
Tmed3	41.4392	24.1393	0.600811	0.000375831	Up
Tmem106a	22.6209	30.9857	-0.635164	3.23405e-06	Down
Tmem132e	0.0325531	0.256136	-3.19644	0.000186135	Down
Tmem147	35.8871	20.5415	0.626543	0.00118275	Up
Tmem177	1.58221	0.744865	0.913778	0.00194936	Up
Tmem184b	19.1425	28.5891	-0.764426	7.6889e-05	Down
Tmem205	33.5955	18.7405	0.662955	0.000205344	Up
Tmem223	25.0668	11.6675	0.92876	0.000201076	Up
Tmem229b	5.11344	8.09387	-0.856588	0.00332117	Down
Tmem67	5.78198	10.5641	-1.07024	0.00205669	Down
Tmtc2	3.59164	5.57585	-0.823412	0.00021405	Down
Tnfaip2	52.2818	91.3681	-0.989901	7.57672e-06	Down
Tnfaip3	52.5216	144.874	-1.66833	5.48431e-05	Down
Tnfaip8l3	2.13775	4.43976	-1.24324	5.06837e-07	Down
Tnfrsf11b	1.78769	6.03226	-1.95398	4.521e-07	Down
Tnfrsf1b	64.251	112.101	-0.990521	7.38918e-06	Down
Tnfrsf8	0.864869	1.73839	-1.19168	0.000227955	Down
Tnfrsf9	9.91727	31.3174	-1.8547	8.31689e-09	Down
Tnfsf15	0.321215	2.47283	-3.16513	2.5244e-07	Down
Tnip1	94.7352	194.78	-1.23551	0.000213095	Down
Tnip3	1.63051	12.2771	-3.13642	0.000707037	Down
Tnks1bp1	19.3072	30.2904	-0.840608	0.000427563	Down
Top3a	1.56673	2.86374	-1.0708	0.00333206	Down
Tor1aip2	35.8575	62.3702	-0.989793	3.01178e-06	Down
Tor3a	90.7996	144.138	-0.854146	5.44476e-05	Down
Tpbg	0.967708	1.96725	-1.21529	1.65248e-05	Down
Tppp	0.986772	0.354856	1.29367	4.60104e-06	Up
Tpst1	15.9956	26.9901	-0.949405	0.000841159	Down
Trafd1	88.449	174.37	-1.17458	7.7016e-05	Down
Treml2	10.6954	17.5332	-0.899531	2.02402e-05	Down
Trim14	10.0501	17.4385	-0.984079	6.7399e-06	Down
Trim21	23.1359	39.25	-0.952098	3.82397e-05	Down
Trim25	41.5291	66.9491	-0.883052	0.000743013	Down
Trim30a	117.048	164.709	-0.67236	0.00024625	Down
Trim30c	4.14921	17.2561	-2.24557	1.01792e-13	Down
Trim56	9.82703	20.4832	-1.23994	0.000491559	Down
Trim6	0.337468	0.993061	-1.75137	1.09615e-06	Down
Triobp	6.64587	9.89854	-0.75491	4.55185e-05	Down
Trip12	20.1094	28.7948	-0.70768	0.00134633	Down
Trp53i11	27.2441	37.3373	-0.642023	0.00140178	Down
Trpm4	3.2964	1.92412	0.6	0.00270821	Up
Trpv4	5.85253	9.48782	-0.882486	6.68177e-06	Down
Tspan2	36.1424	15.7826	1.01103	4.39603e-09	Up
Tst	40.1968	18.1495	0.964404	4.33904e-08	Up
Ttc17	5.6664	8.35464	-0.744148	0.000124688	Down
Ttc23	1.04596	0.531245	0.803325	0.00316715	Up
Ttc39c	2.09629	3.81094	-1.05776	0.000599514	Down
Tubb2a	24.9337	33.7331	-0.620995	0.000122549	Down
Tubb2b	1.32792	2.60077	-1.15782	2.41683e-05	Down
Tubb6	46.8242	95.4744	-1.23223	0.00112603	Down
Tut4	2.15676	5.24728	-1.48947	0.000752719	Down
Tut7	23.0979	34.419	-0.765721	0.00221329	Down
Txnrd2	4.39054	2.37339	0.701763	0.00155524	Up
U90926	2.58617	7.16608	-1.67783	0.00246987	Down
Uaca	6.65412	17.9707	-1.63819	0.000161314	Down
Uba1	47.629	66.6201	-0.666402	2.59612e-05	Down
Ubash3b	3.33465	4.61953	-0.652813	0.000760821	Down
Ube2l6	271.752	371.419	-0.62717	0.00160745	Down
Ubr4	12.9448	26.0654	-1.20284	2.29283e-05	Down
Ubtd1	17.2501	25.2769	-0.73512	7.40736e-05	Down
Uckl1os	4.39479	2.26896	0.773272	0.00121913	Up
Uhrf1	2.42312	3.33147	-0.638174	0.00180146	Down
Ulbp1	0.273056	0.841319	-1.80335	4.17231e-05	Down
Unc5b	1.79369	3.25196	-1.05067	0.000473056	Down
Upp1	107.74	180.366	-0.920027	1.50739e-06	Down
Usb1	13.8651	20.3409	-0.737942	1.70659e-06	Down
Usp18	219.753	445.173	-1.20729	6.0908e-07	Down
Usp25	29.2361	64.456	-1.33983	8.98158e-05	Down
Usp9x	7.29771	10.4584	-0.705339	0.00150643	Down
Vamp5	9.54303	5.17634	0.703976	0.00210176	Up
Vav3	2.20363	2.99311	-0.621508	0.00336315	Down
Vcan	8.32021	19.2483	-1.40131	3.35554e-11	Down
Vcl	27.6236	44.1167	-0.867507	0.00205886	Down
Vnn3	6.61525	9.48425	-0.70871	0.00150428	Down
Wdr59	2.02632	3.80788	-1.1033	2.3071e-05	Down
Whamm	11.8449	21.5209	-1.05865	0.000715227	Down
Wnt3a	1.44696	0.324089	2.00055	0.00133142	Up
Xaf1	33.1257	49.0471	-0.753719	0.000154487	Down
Zbp1	176.68	275.367	-0.814699	0.000177871	Down
Zbtb32	0.789193	1.56847	-1.17177	2.61208e-05	Down
Zc3h12a	24.4389	59.5674	-1.47919	4.25576e-07	Down
Zc3h12d	1.515	3.04699	-1.20203	9.85606e-05	Down
Zcchc2	5.6556	10.7103	-1.11845	0.000240624	Down
Zeb1	1.87348	3.16629	-0.95314	0.00317017	Down
Zfhx4	0.0504134	0.210741	-2.27492	0.000491374	Down
Zfp354c	0.693172	0.27702	1.13085	0.00153657	Up
Zfp366	1.38467	2.72739	-1.15819	0.00316263	Down
Zfp41	0.427521	0.853053	-1.17404	7.41128e-06	Down
Zfp503	7.61611	3.75479	0.84193	0.000259897	Up
Zfp516	1.74877	2.81847	-0.87699	3.71265e-06	Down
Zfp536	0.00626949	0.0371159	-2.76757	0.000136527	Down
Zfp579	3.74245	1.92817	0.776188	0.00148432	Up
Zfp976	0.761653	0.340639	0.983551	0.00151097	Up
Zfyve21	24.683	12.333	0.821833	2.90972e-05	Up
Zhx3	2.32856	3.87599	-0.914249	0.00176306	Down
Znfx1	44.7023	117.114	-1.58098	3.97333e-07	Down
Zswim4	7.80916	13.3083	-0.943967	8.96594e-05	Down
Zup1	6.53087	12.558	-1.14137	0.000394174	Down
Zwint	16.5162	23.4139	-0.692458	0.00154439	Down
Zyx	34.9631	47.6402	-0.626032	7.46299e-05	Down
