# Supplementary material for: Sinensetin, a polymethoxyflavone from citrus fruits, ameliorates LPS-induced acute lung injury by suppressing Txnip/NLRP3/Caspase-1/GSDMD signaling-mediated inflammatory responses and pyroptosis
Source: Royal Society of Chemistry journal article supplement (doi:10.1039/d4fo01704h), 2024-01-01
Supplement: d4fo01704h4.xlsx [file d4fo01704h4.xlsx]

## Sheet: Sheet1
Supplementary Table 3. Box size of molecular docking for SIN-NLRP3 complex.
Name	PDB_ID	Xmin	Xmax	Ymin	Ymax	Zmin	Zmax	Grid dimension	Min corner
NLRP3	6NPY	49.69	166.11	57.81	149.27	50.18	152.86	266 × 210 × 235	X: 49.64
									Y: 57.60
									Z: 50.08
