# Supplementary figures and images for: Sinensetin, a polymethoxyflavone from citrus fruits, ameliorates LPS-induced acute lung injury by suppressing Txnip/NLRP3/Caspase-1/GSDMD signaling-mediated inflammatory responses and pyroptosis
Source: Royal Society of Chemistry journal article supplement (doi:10.1039/d4fo01704h), 2024-01-01

## Original Scans of Immunoblots

**Fig. 2A**

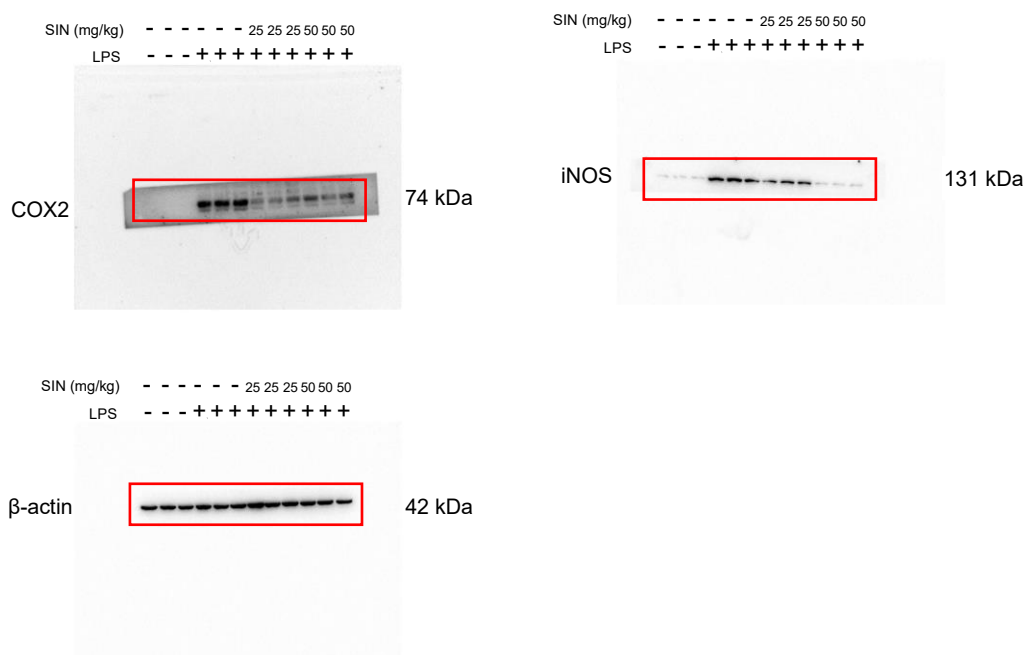

**Fig. 4A**

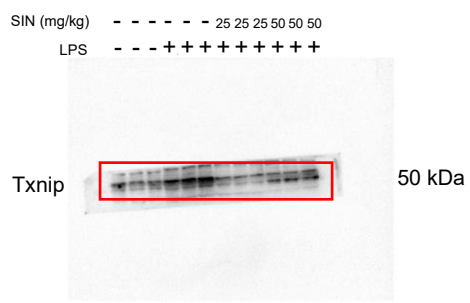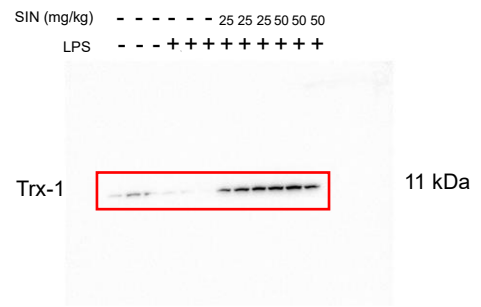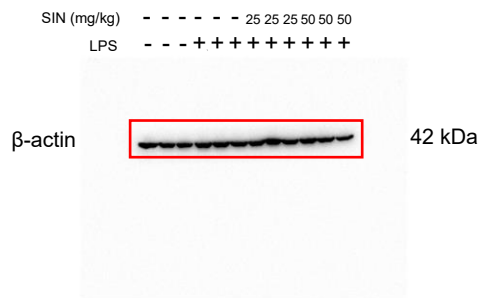



**Fig. 5H**

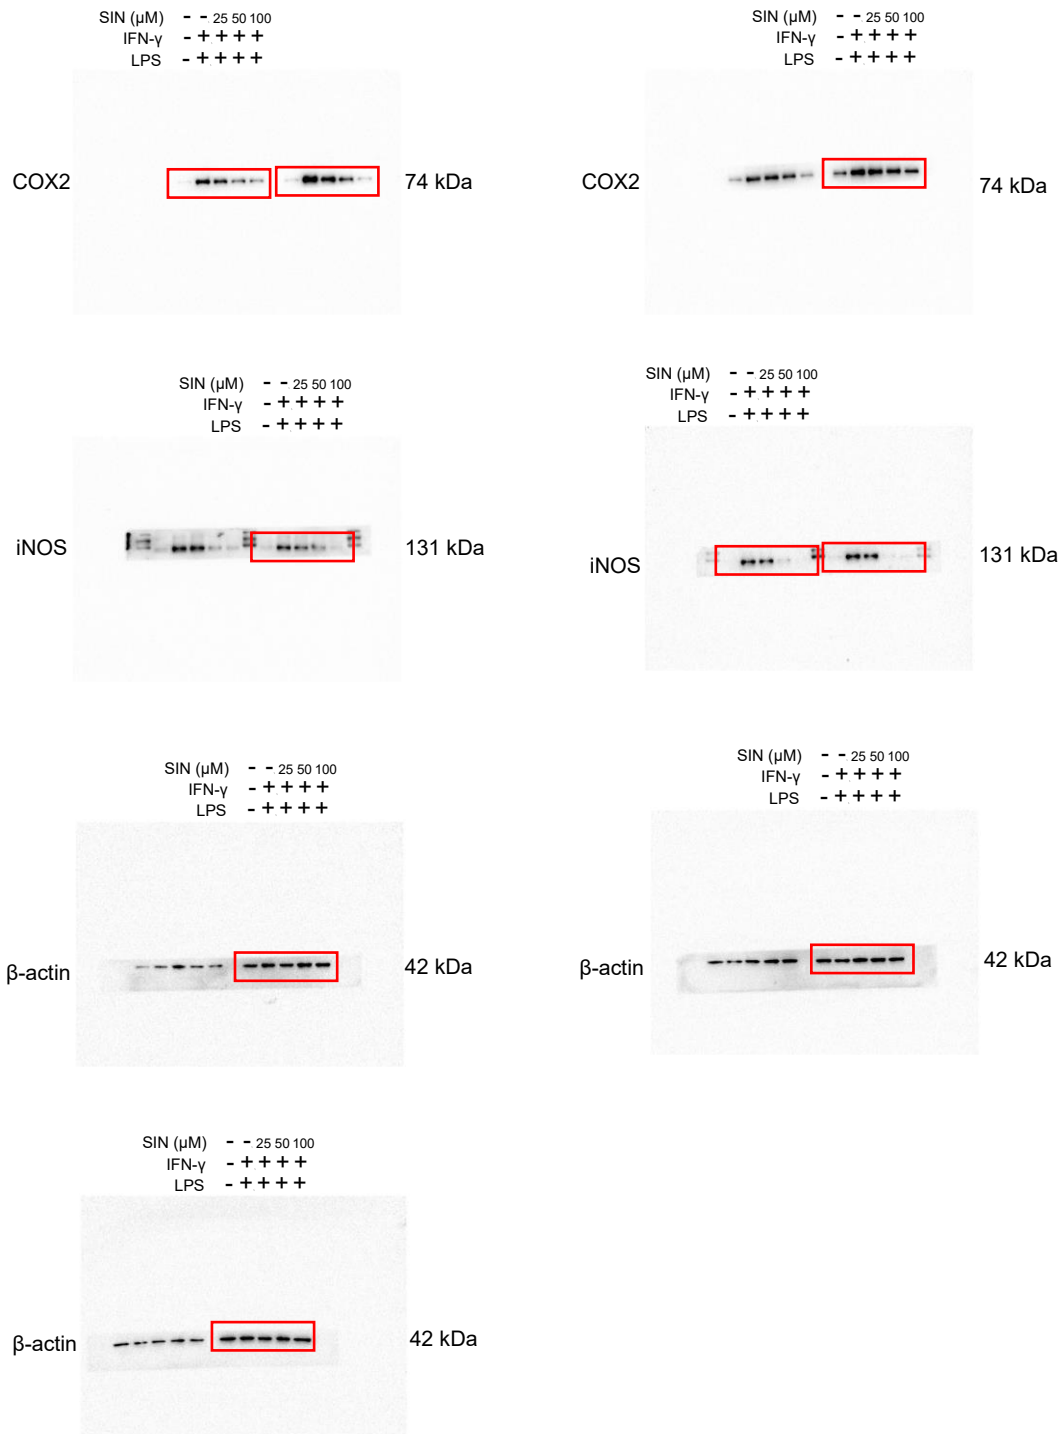

**Fig. 6B**

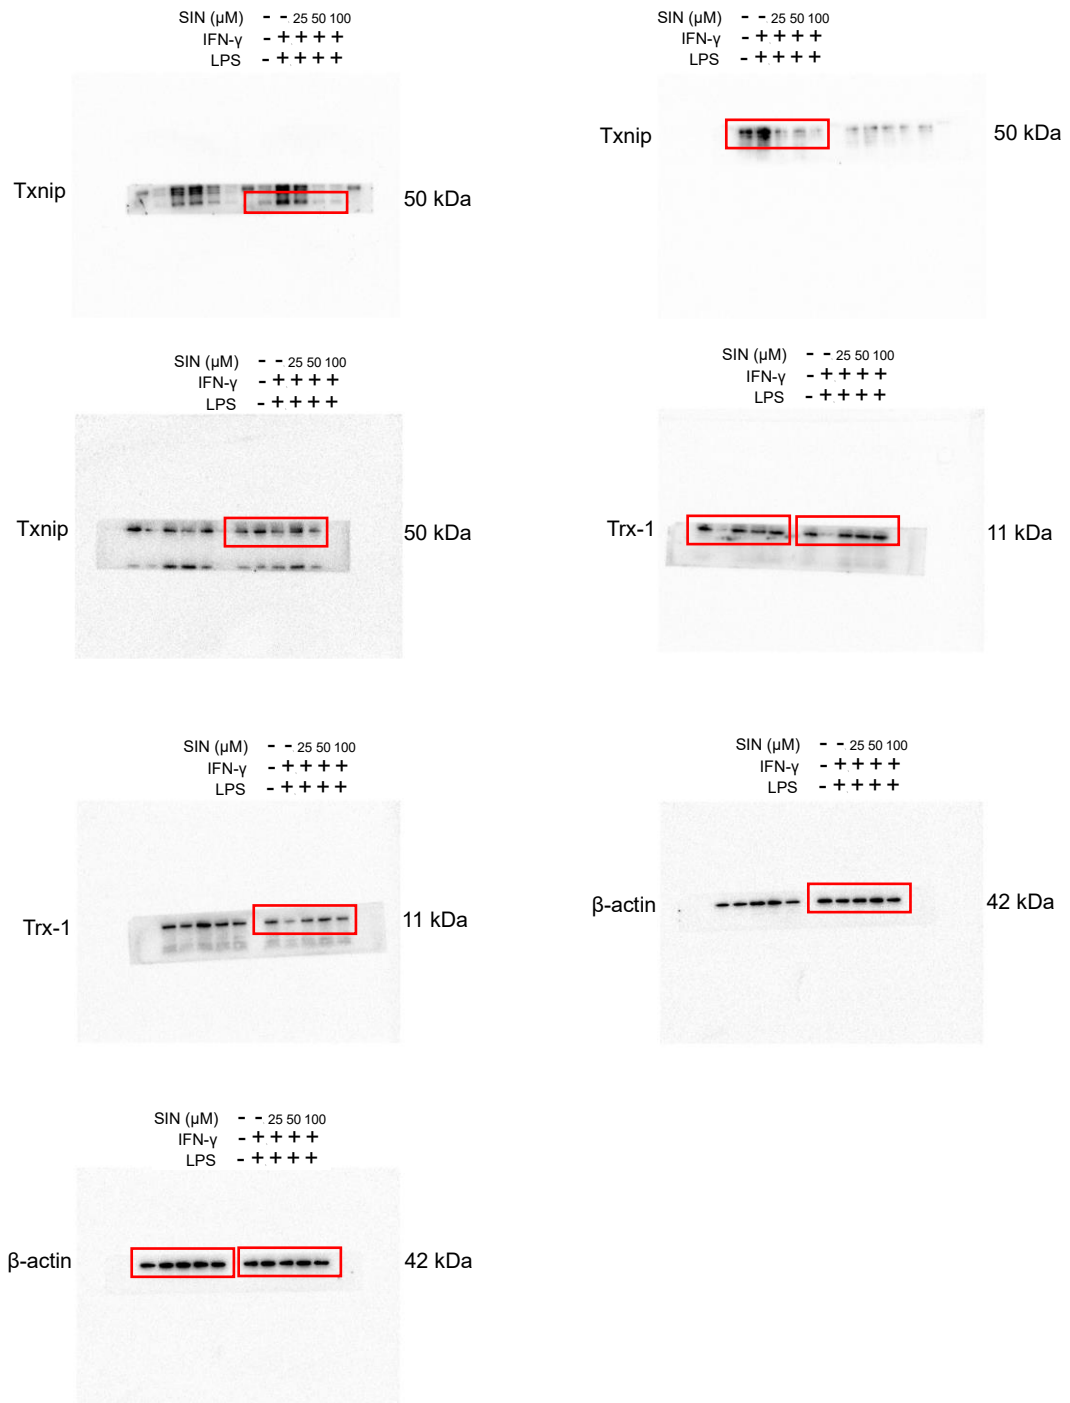

**Fig. 6E**

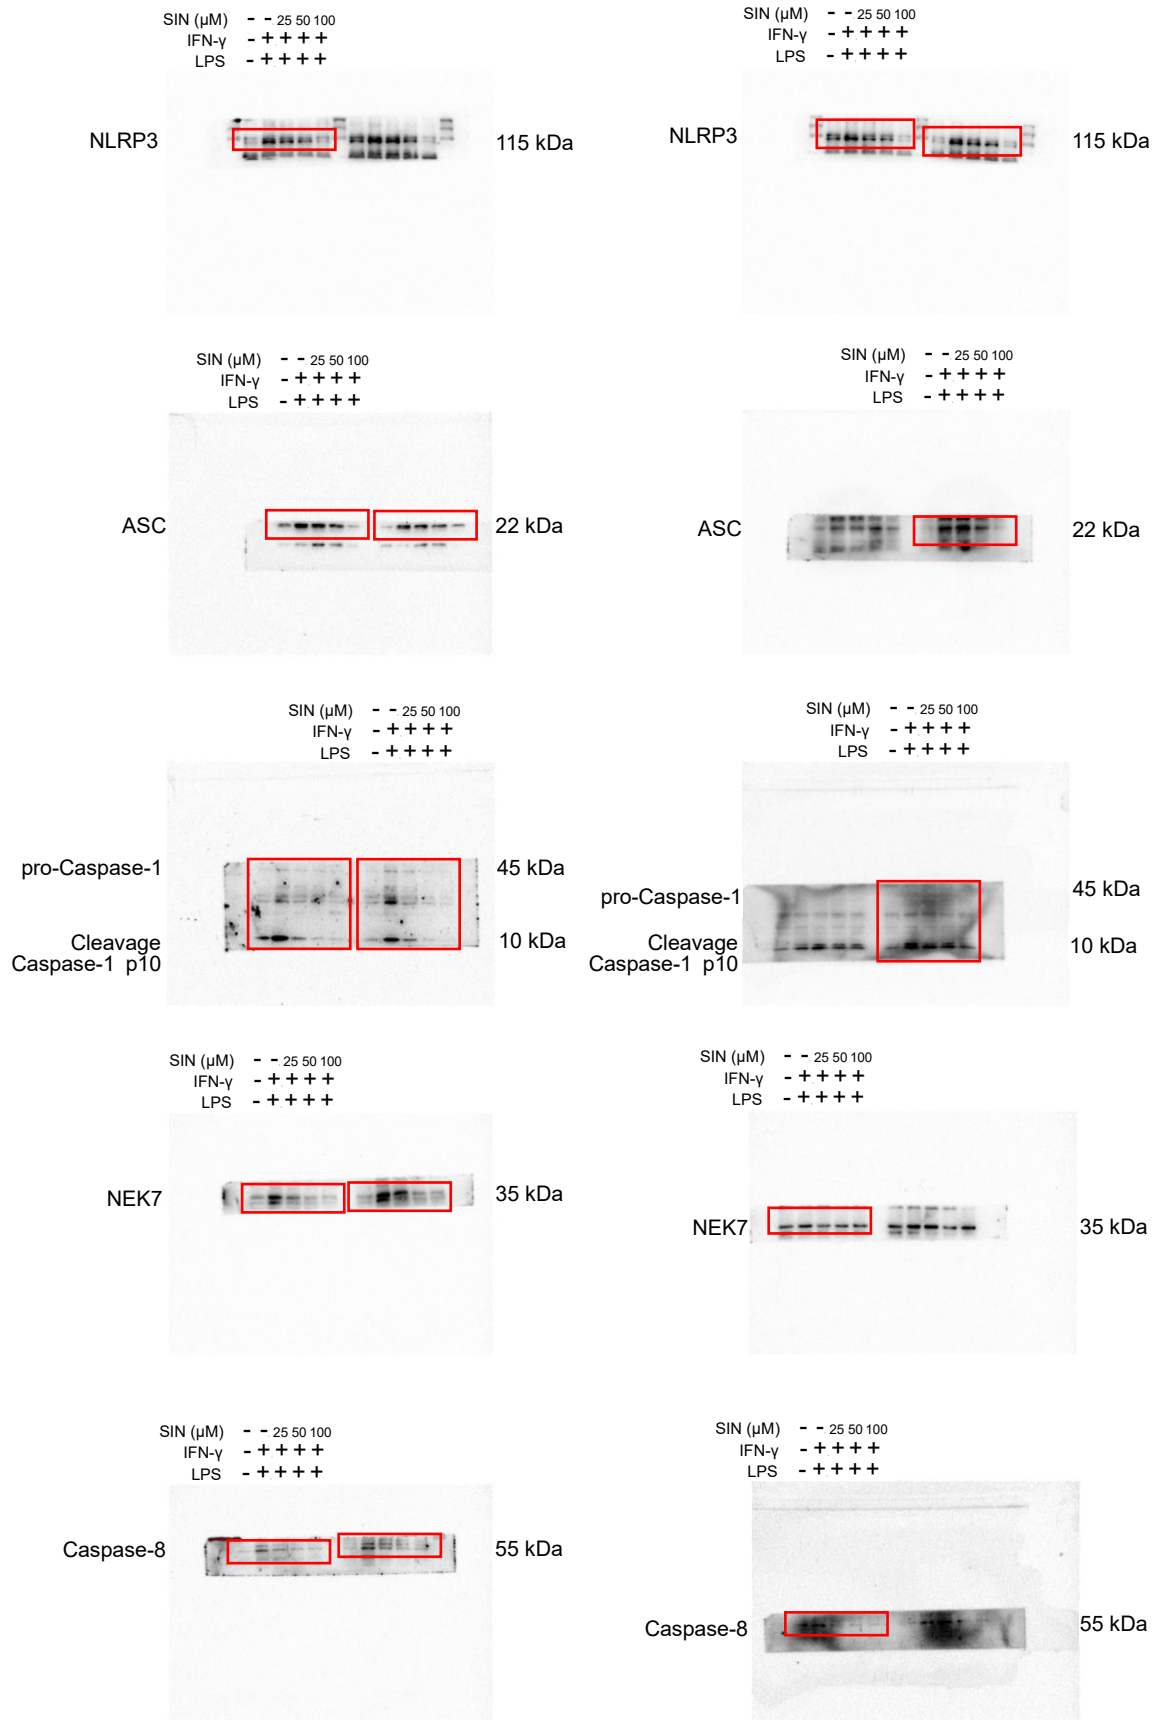

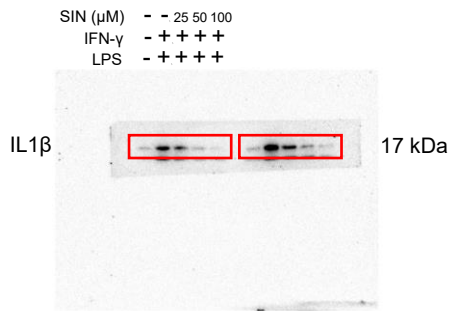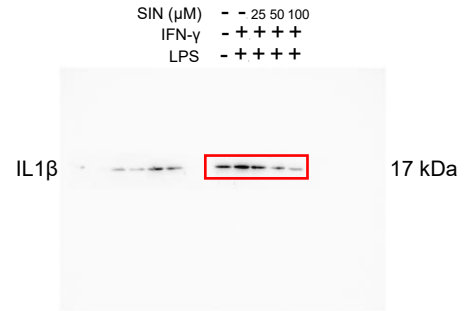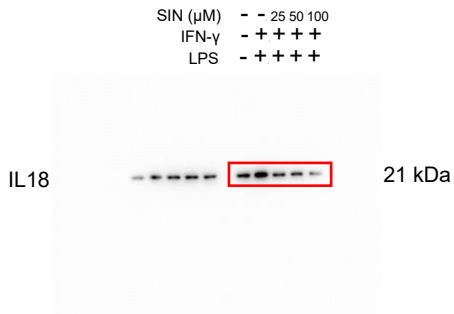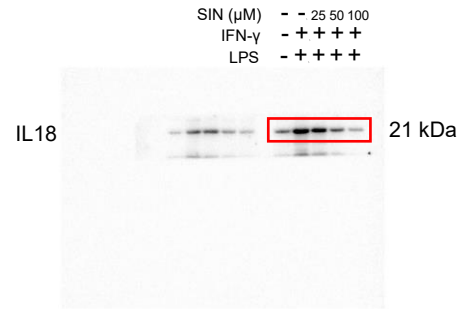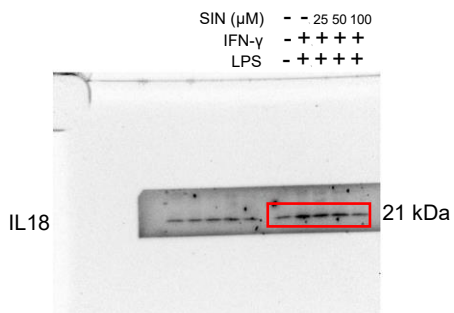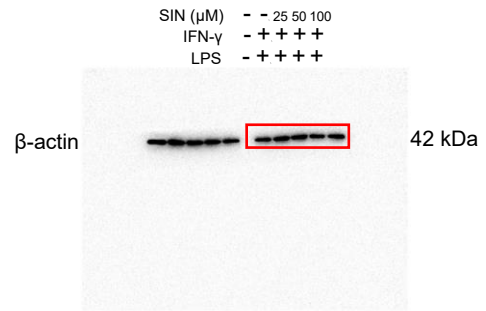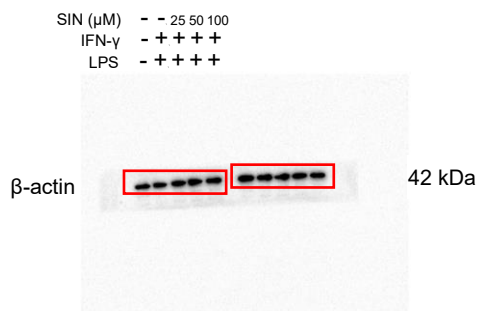

**Fig. 6P**

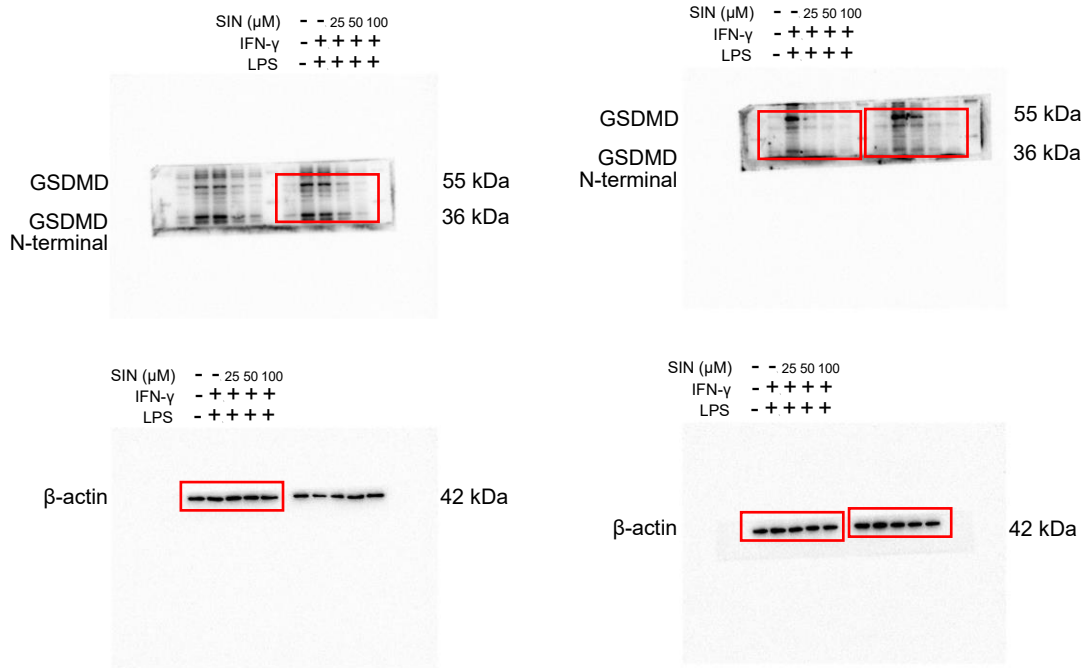

Supplement: d4fo01704h1.pdf [file d4fo01704h1.pdf]
